# Supplementary material for: New ent-kaurane diterpenoid acids from Nouelia insignis Franch and their anti-inflammatory activity
Source: Royal Society of Chemistry journal article supplement (doi:10.1039/d2ra01684b), 2022-01-01
Supplement: d2ra01684b1.pdf [file d2ra01684b1.pdf]

## Supporting Information

### **New *ent*-kaurane diterpenoid acids from *Nouelia insignis* Franch and their anti-inflammatory activity**

Zhi-li Wu <sup>a,b</sup>, Jia-yu Li <sup>b</sup>, Peng-li Huang <sup>b</sup>, Ze-shi Sun <sup>b</sup>, Hui-liang Li <sup>a, b, \*</sup>, Wei-dong Zhang <sup>a, b, \*</sup>

#### **Affiliation**

<sup>a</sup> School of Traditional Chinese Pharmacy, China Pharmaceutical University, Nanjing, Jiangsu 211198, P.R. China

<sup>b</sup> School of Pharmacy, Second Military Medical University, Shanghai 200433, P.R. China

Corresponding authors

Tel.: +86 21 81871245

*E-mail addresses:* faranli@hotmail.com (H.-L. Li), wdzhangy@hotmail.com (W.-D. Zhang).

## Contents

|                                                                                                                                                           |         |
|-----------------------------------------------------------------------------------------------------------------------------------------------------------|---------|
| <u>Table S1-S3<sup>1</sup>H NMR (500 MHz, CD<sub>3</sub>OD, <i>J</i> in Hz) and <sup>13</sup>C NMR (125 MHz, CD<sub>3</sub>OD) Spectroscopic Data for</u> |         |
| <u>1-11</u> .....                                                                                                                                         | 3       |
| <u>Materials and methods</u> .....                                                                                                                        | 6       |
| <u>Compound characterizations of 1-11</u> .....                                                                                                           | 8       |
| <u>Figure S1-S11. HRESIMS, IR, OR, CD, 1D and 2D NMR spectrum of <i>Noeinsiancin A (1)</i></u> .....                                                      | 13-23   |
| Figure S12. X-ray structure of <i>Noeinsiancin A (1)</i> .....                                                                                            | 24      |
| <u>Figure S13-S23. HRESIMS, IR, OR, CD, 1D and 2D NMR spectrum of <i>Noeinsiancin B (2)</i></u> .....                                                     | 25-35   |
| Figure S24. X-ray structure of <i>Noeinsiancin B (2)</i> .....                                                                                            | 36      |
| <u>Figure S25-S35. HRESIMS, IR, OR, CD, 1D and 2D NMR spectrum of <i>Noeinsiancin C (3)</i></u> .....                                                     | 37-47   |
| <u>Figure S36-S46. HRESIMS, IR, OR, CD, 1D and 2D NMR spectrum of <i>Noeinsiancin D (4)</i></u> .....                                                     | 48-58   |
| Figure S47. X-ray structure of <i>Noeinsiancin D (4)</i> .....                                                                                            | 59      |
| <u>Figure S48-S58. HRESIMS, IR, OR, CD, 1D and 2D NMR spectrum of <i>Noeinsiancin E (5)</i></u> .....                                                     | 60-70   |
| Figure S59. X-ray structure of <i>Noeinsiancin E (5)</i> .....                                                                                            | 71      |
| <u>Figure S60-S70. HRESIMS, IR, OR, CD, 1D and 2D NMR spectrum of <i>Noeinsiancin F (6)</i></u> .....                                                     | 72-82   |
| Figure S71. X-ray structure of <i>Noeinsiancin F (6)</i> .....                                                                                            | 83      |
| <u>Figure S72-S82. HRESIMS, IR, OR, CD, 1D and 2D NMR spectrum of <i>Noeinsiancin G (7)</i></u> .....                                                     | 84-94   |
| <u>Figure S83-S93. HRESIMS, IR, OR, CD, 1D and 2D NMR spectrum of <i>Noeinsiancin H (8)</i></u> .....                                                     | 95-105  |
| Figure S94. X-ray structure of <i>Noeinsiancin H (8)</i> .....                                                                                            | 106     |
| <u>Figure S95-S105. HRESIMS, IR, OR, CD, 1D and 2D NMR spectrum of <i>Noeinsiancin I (9)</i></u> .....                                                    | 107-117 |
| Figure S106. X-ray structure of <i>Noeinsiancin I (9)</i> .....                                                                                           | 118     |
| <u>Figure S107-S117. HRESIMS, IR, OR, CD, 1D and 2D NMR spectrum of <i>Noeinsiancin J (10)</i></u> .....                                                  | 119-129 |
| <u>Figure S118-S128. HRESIMS, IR, OR, CD, 1D and 2D NMR spectrum of <i>Noeinsiancin K (11)</i></u> .....                                                  | 130-140 |

**Table S1 <sup>13</sup>C NMR Spectroscopic Data for compounds 1–11 <sup>a</sup> ( $\delta$  in ppm).**

| NO | 1     | 2     | 3     | 4     | 5     | 6     | 7     | 8     | 9     | 10    | 11    |
|----|-------|-------|-------|-------|-------|-------|-------|-------|-------|-------|-------|
| 1  | 42.6  | 35.7  | 41.2  | 41.4  | 49.7  | 49.9  | 35.0  | 33.9  | 42.0  | 40.3  | 34.4  |
| 2  | 20.2  | 27.1  | 18.8  | 20.1  | 64.7  | 64.8  | 27.2  | 25.9  | 20.3  | 18.9  | 27.0  |
| 3  | 39.1  | 71.5  | 37.7  | 39.0  | 47.7  | 47.7  | 72.0  | 70.3  | 39.3  | 37.8  | 71.5  |
| 4  | 44.5  | 48.3  | 43.0  | 44.7  | 45.8  | 45.9  | 45.0  | 47.7  | 44.7  | 43.3  | 48.6  |
| 5  | 57.9  | 50.3  | 56.7  | 57.3  | 56.9  | 56.9  | 49.6  | 48.3  | 57.7  | 56.4  | 49.3  |
| 6  | 22.2  | 21.9  | 20.9  | 21.4  | 21.4  | 21.2  | 21.1  | 21.0  | 23.1  | 21.4  | 21.2  |
| 7  | 35.1  | 35.9  | 34.4  | 34.5  | 35.4  | 34.9  | 34.9  | 38.7  | 36.0  | 34.3  | 35.2  |
| 8  | 45.6  | 46.6  | 45.3  | 53.5  | 53.9  | 53.7  | 54.0  | 45.6  | 49.3  | 45.9  | 54.5  |
| 9  | 52.3  | 51.6  | 51.0  | 52.3  | 53.1  | 53.1  | 53.2  | 45.4  | 47.6  | 46.0  | 53.1  |
| 10 | 37.8  | 37.6  | 36.5  | 40.8  | 42.4  | 42.7  | 41.4  | 38.8  | 40.4  | 39.0  | 41.0  |
| 11 | 82.5  | 77.8  | 76.3  | 29.0  | 19.4  | 19.6  | 19.5  | 17.5  | 19.7  | 18.5  | 19.5  |
| 12 | 79.8  | 39.7  | 38.2  | 71.9  | 25.6  | 33.2  | 33.4  | 33.1  | 27.5  | 26.2  | 25.8  |
| 13 | 50.7  | 43.3  | 38.3  | 49.4  | 36.3  | 39.4  | 39.5  | 40.1  | 45.0  | 39.5  | 33.6  |
| 14 | 37.3  | 38.9  | 37.5  | 37.5  | 38.2  | 37.7  | 37.7  | 36.1  | 41.6  | 40.6  | 38.0  |
| 15 | 82.3  | 82.9  | 77.7  | 226.2 | 227.0 | 212.3 | 212.8 | 81.8  | 90.4  | 79.9  | 224.0 |
| 16 | 85.4  | 85.6  | 86.8  | 42.9  | 49.0  | 151.2 | 151.4 | 157.6 | 84.1  | 77.1  | 57.3  |
| 17 | 21.0  | 20.7  | 61.8  | 11.7  | 10.3  | 115.4 | 115.1 | 103.7 | 64.6  | 69.1  | 59.9  |
| 18 | 181.6 | 181.3 | 180.2 | 181.3 | 180.7 | 181.2 | 183.0 | 180.2 | 181.7 | 180.3 | 181.0 |
| 19 | 29.6  | 25.1  | 28.2  | 29.4  | 29.3  | 29.5  | 25.3  | 23.6  | 29.5  | 28.1  | 24.9  |
| 20 | 18.8  | 18.2  | 17.0  | 16.3  | 17.2  | 17.3  | 16.2  | 14.8  | 16.3  | 14.7  | 15.8  |

<sup>a</sup> NMR Data were measured at 125 MHz in CD<sub>3</sub>OD for **1-11**.

**Table S2 <sup>1</sup>H NMR Spectroscopic Data for compounds 1–6<sup>a</sup> ( $\delta$  in ppm, *J* in Hz).**

| NO | 1                     | 2                      | 3                     | 4                     | 5                     | 6                     |
|----|-----------------------|------------------------|-----------------------|-----------------------|-----------------------|-----------------------|
| 1  | 1.88, 1.19            | 1.58                   | 1.85, 1.18            | 1.86, 0.85            | 2.17, 0.67, t, (12.0) | 2.19, 0.70, t, (12.0) |
| 2  | 1.85, 1.43, m         | 2.13, 1.57, m          | 1.86, 1.42, m         | 1.91, 1.42, m         | 4.08, m               | 4.09, m               |
| 3  | 2.16, 1.05, m         | 3.99, overlap          | 2.16, 1.04, m         | 2.13, 1.04, m         | 2.41, 0.96, t, (12.2) | 2.41, 0.97, t, (12.3) |
| 5  | 1.05, m               | 1.47, m                | 1.06, m               | 1.17, m               | 1.11, m               | 1.11, m               |
| 6  | 1.84, 1.70, m         | 1.76, m                | 1.85, 1.75, m         | 1.90, 1.78, m         | 1.93, 1.81, m         | 1.95, m               |
| 7  | 1.54, 1.25, m         | 1.78, 1.21, m          | 1.56, 1.22, m         | 1.74, 1.39, m         | 1.67, 1.36, m         | 1.82, 1.34, m         |
| 9  | 1.72                  | 1.68                   | 1.70                  | 1.16                  | 1.06                  | 1.19                  |
| 11 | 4.09, overlap         | 4.28, overlap          | 4.33, overlap         | 1.93, m               | 1.71, 1.23, m         | 1.77, 1.47, m         |
| 12 | 4.14, overlap         | 2.00, d, (11.4), 1.82, | 2.00, d, (11.2), 1.80 | 4.09, m               | 1.69, m               | 1.89, 1.69, m         |
| 13 | 2.14                  | 2.19                   | 2.45                  | 2.41, m               | 2.44, m               | 3.07, m               |
| 14 | 1.95, d, (12.7), 1.19 | 1.95, d, (12.3), 1.14  | 1.97, d, (12.3), 1.11 | 2.33, d, (12.5), 1.48 | 2.45, 1.43            | 2.43, 1.40            |
| 15 | 2.82, s               | 2.87, s                | 3.06, s               |                       |                       |                       |
| 16 |                       |                        |                       | 2.59                  | 2.30                  |                       |
| 17 | 1.34, s               | 1.27, s                | 3.59 dd, (11.5, 5.8)  | 1.25, d, (7.2)        | 1.09, d, (7.2)        | 5.89, 5.32, s         |
| 19 | 1.19, s               | 1.24, s                | 1.19, s               | 1.21, s               | 1.27, s               | 1.27, s               |
| 20 | 0.99, s               | 1.01, s                | 1.02, s               | 0.98, s               | 1.04, s               | 1.06, s               |

<sup>a</sup> NMR Data were measured at 500 MHz in CD<sub>3</sub>OD for **1-6**.

**Table S3 <sup>1</sup>H NMR Spectroscopic Data for compounds 7–11 <sup>a</sup> ( $\delta$  in ppm, *J* in Hz).**

| NO | 7                     | 8                      | 9                     | 10                              | 11                                          |
|----|-----------------------|------------------------|-----------------------|---------------------------------|---------------------------------------------|
| 1  | 1.54, 1.24            | 1.63, 1.32             | 1.90, 0.89            | 1.92, 0.89                      | 1.55, 1.23                                  |
| 2  | 2.24, 1.53, m         | 2.19, 1.55, m          | 1.91, 1.40, m         | 1.91, 1.40, m                   | 2.18, 1.54, m                               |
| 3  | 4.00                  | 3.98                   | 2.12, 1.02, m         | 2.12, 1.01, m                   | 3.97, overlap                               |
| 5  | 1.54, m               | 1.48, m                | 1.05, m               | 1.04, m                         | 1.57, m                                     |
| 6  | 1.92, 1.80, m         | 1.86, 1.73, m          | 1.83, m               | 1.82, 1.60, m                   | 1.86, 1.76, m                               |
| 7  | 1.82, 1.31, m         | 1.65, 1.29, m          | 1.91, 1.45, m         | 1.94, 0.88, m                   | 1.72, 1.34, m                               |
| 9  | 1.22                  | 1.44                   | 1.40                  | 1.40                            | 1.14                                        |
| 11 | 1.72, 1.43, m         | 1.63, 1.49, m          | 1.61, 1.53, m         | 1.69, 1.47, m                   | 1.69, 1.21, m                               |
| 12 | 1.89, 1.67, m         | 1.63, 1.45, m          | 1.63, 1.47, m         | 1.76, 1.40, m                   | 1.75, m                                     |
| 13 | 3.06, m               | 2.59, m                | 1.92, m               | 1.96, m                         | 2.65, m                                     |
| 14 | 2.46, d, (12.1), 1.38 | 2.00, d, (11.9), 1.01  | 1.58, 1.42            | 1.60, 1.33                      | 2.50, d, (12.2), 1.42                       |
| 15 |                       | 3.68                   | 3.42, s               | 3.06, s                         |                                             |
| 16 |                       |                        |                       |                                 | 2.50                                        |
| 17 | 5.88, 5.30, s         | 5.04, s, 4.91, overlap | 3.75 dd, (11.9, 10.2) | 3.42, d, (11.2), 3.27 d, (11.3) | 3.94, dd, (11.3, 6.6), 3.59, dd, (9.2, 2.1) |
| 19 | 1.24, s               | 1.23, s                | 1.18, s               | 1.18, s                         | 1.24, s                                     |
| 20 | 1.08, s               | 0.99, s                | 0.99, s               | 0.97, s                         | 1.05, s                                     |

<sup>a</sup> NMR Data were measured at 500 MHz in CD<sub>3</sub>OD for **7-11**.

## **Materials and methods**

### **1. General experimental procedures**

Column chromatography (CC): silica gel H (10-40  $\mu\text{m}$ ) and silica gel (200-300 mesh) (Marine Chemical Factory, Qingdao, P. R. China); MCI gel CHP-20P: (Daiso, Co., Japan) and RP-C<sub>18</sub> gel (40–63  $\mu\text{m}$ ; Daiso, Co., Japan) were used for column chromatography; Sephadex LH-20 (Pharmacia Fine Chemicals, Piscataway, NJ, USA). TLC: silica gel plates, visualization by spraying with 10 % H<sub>2</sub>SO<sub>4</sub> in EtOH and dragendorff's reagent. Semi-preparative HPLC: Agilent 1260 series (Agilent Technologies, US) with a Zorbax SB-C<sub>18</sub> (5  $\mu\text{M}$ , 9.4 mm  $\times$  25 cm) column. NMR Spectra: Bruker Avance III-500 spectrometer (Bruker, Switzerland). MS: Agilent MSD-Trap-XCT (for ESI) and Agilent-6520 Q-TOF mass spectrometer (for HR-ESI). IR: Thermo Scientific Nicolet 6700 (Thermo Scientific, US). UV spectra: Agilent 1260 series DAD detector (Agilent Technologies, US). CD spectrum: Brighttime Chirascan (Applied Photophysics Ltd, UK). Optical rotation: Rudolph Autopo V (Rudolph Research Analytical, Hackettstown, NJ).

### **2. Plant material**

*Nouelia insignis* Franch were collected from Sichun province of China in August 2020, and identified by Prof. Bao-kang Huang (Department of pharmacognosy, Second Military Medical University, Shanghai, China). A voucher specimen (No. 202008-VS) is deposited in the department of pharmacognosy, Second Military Medical University.

### **3 Extraction and isolation**

The dried and crushed branch of *Nouelia insignis* Franch (20.0 kg) were

ultrasonically extracted with 95% methanol overnight at room temperature (20 L × 3). After remove of solvent, the methanol extract (550.5 g) was extracted with water, petroleum ether (PE) and ethyl acetate (EtOAc) (3 times with 5 L each). The PE extract (124.3 g) was segmented by Silica gel H (10-40 μm) column chromatography eluting with petroleum ether- ethyl acetate (PE / EtOAc, 50:1 to 0:1 v/v) to afford 7 fractions (Fr. 1-7). Fraction 4 (21.6 g) was separated by MCI column chromatography (MeOH/H<sub>2</sub>O, 10:90 to 100:0 v/v) to provide 5 subfractions (Fr. 4.1-4.5). Then, fraction 4.3 was separated by ODS (CH<sub>3</sub>CN /H<sub>2</sub>O, 10:90 to 40:60 v/v) to afford 6 subfractions (Fr. 4.3.1- 4.3.6). Fr. 4.3.2 and Fr. 4.3.4 were purified by semi-preparative RP-C<sub>18</sub> HPLC (CH<sub>3</sub>OH/H<sub>2</sub>O, 63:37 v/v 1.0 mL/min) to give compounds **4** (12.3 mg), **5** (10.2 mg), **13** (9.4 mg), **14** (13.6 mg) and **8** (9.5 mg), **18** (10.6 mg), **19** (9.2 mg), **21** (8.2 mg). Fraction 4.5 was also separated by ODS (CH<sub>3</sub>OH /H<sub>2</sub>O, 10:90 to 40:60 v/v) to afford compounds **22** (15.2 mg), **23** (9.4 mg). Fraction 5 was initially separated by Sephadex LH-20 CC eluting with CH<sub>3</sub>OH/H<sub>2</sub>O (55:45) to yield 5 subfractions (Fr. 5.1-5.5). Compounds **1** (14.3 mg) and **2** (10.3 mg) were obtained from Fr. 5.2 by ODS column chromatography (CH<sub>3</sub>OH /H<sub>2</sub>O, 30:70 to 55:45 v/v). Fr. 5.3-5.4 were purified by ODS column chromatography (CH<sub>3</sub>OH /H<sub>2</sub>O, 30:70 to 80:20 v/v) and further purified by semi-preparative RP-C<sub>18</sub> HPLC (CH<sub>3</sub>OH /H<sub>2</sub>O, 65:35 v/v 1.0 mL/min) to afford compounds **3** (13.3 mg), **12** (9.8 mg) and **9** (8.3 mg), **10** (11.8 mg), **24** (14.1 mg), **25** (9.7 mg). Fraction 6 was separated on a Sephadex LH-20 CC eluted with MeOH/H<sub>2</sub>O (60:40, v/v) to yield 7 sufractions (Fr. 6.1-6.7), Compound **11** (8.3 mg) was obtained from Fr. 6.1 through the ODS column chromatography (CH<sub>3</sub>OH /H<sub>2</sub>O, 30:70 to 55:45 v/v). Meanwhile,

Purifications of Fr. 6.3 and 6.4 by RP-HPLC (CH<sub>3</sub>OH/H<sub>2</sub>O, 60:40 v/v 1.0 mL/min) yielded compounds **6** (9.8 mg), **7** (13.1 mg) and **17** (9.1 mg). Fr. 6.5 was separated with ODS column chromatography (CH<sub>3</sub>OH /H<sub>2</sub>O, 10:90 to 50:50 v/v) and further purified by semi-preparative RP-C<sub>18</sub> HPLC (CH<sub>3</sub>OH/H<sub>2</sub>O, 60:34 v/v 1.0 mL/min) to get compounds **15** (8.8 mg), **16** (12.7 mg) and **26** (13.3 mg). Fraction 7 was separated with ODS column chromatography (CH<sub>3</sub>OH /H<sub>2</sub>O, 10:90 to 40:60 v/v) and semi-preparative RP-C<sub>18</sub> HPLC (CH<sub>3</sub>CN/H<sub>2</sub>O, 62:38 v/v 1.0 mL/min) to give compounds **20** (9.3 mg) and **27** (8.6 mg). Above all, the whole compounds were obtained (Fig. 1).

## Compound characterizations of 1–11

### *Noeinsiancin A (1)*

Colorless needle crystals;  $[\alpha]_{25}^D -71.4$  (c 0.06, CH<sub>3</sub>OH); IR (KBr)  $\nu_{\max}$  3592, 3411, 2974, 2913, 2854, 1677, 1470, 1453, 1197, 1094, 1023, 982, 797, cm<sup>-1</sup>; <sup>1</sup>H- and <sup>13</sup>C-NMR data (500 MHz/125 MHz), see Tables S2 and S1; positive HRESIMS  $m/z$  373.1962 ([M+Na]<sup>+</sup>, calcd for C<sub>20</sub>H<sub>30</sub>O<sub>5</sub>Na, 373.1985). Crystal data for **1**, size 0.20 × 0.14 × 0.09 mm<sup>3</sup>, orthorhombic, space group P 21 21 21,  $a = 7.4300$  (3) Å,  $b = 12.6486$  (5) Å,  $c = 21.6486$  (13) Å,  $V = 1952.27$  (13) Å<sup>3</sup>,  $T = 293.0$  K,  $Z = 4$ ,  $D = 1.315$  Mg/m<sup>3</sup>,  $\lambda$  (CuK $\alpha$ ) = 1.54178 Å,  $F(000) = 840$ , reflections collected/unique 15527/3520 [ $R$  (int) = 0.0500],  $h$  (−8/8),  $k$  (−14/14),  $l$  (−26/24), Final  $R$  indices  $R1 = 0.0389$  and  $wR2 = 0.1043$  ( $I > 2\sigma(I)$ ),  $R1 = 0.0404$  and  $wR2 = 0.1057$  (all data), GOF = 1.093, largest diff. peak/hole, 0.387/−0.236 eÅ<sup>-3</sup>. Absolute structure parameter: 0.04(8). CCDC: 2127069.

### *Noeinsiancin B (2)*

Colorless needle crystals;  $[\alpha]_{25}^D -44.8$  (c 0.07, CH<sub>3</sub>OH); IR (KBr)  $\nu_{\max}$  3593, 3413, 2975, 2911, 1677, 1471, 1445, 1265, 1180, 1394, 1093, 1023, 935, 797 cm<sup>-1</sup>; <sup>1</sup>H- and



<sup>13</sup>C-NMR data (500 MHz/125 MHz), see Tables S2 and S1; positive HRESIMS *m/z* 373.1963 ([M+Na]<sup>+</sup>, calcd for C<sub>20</sub>H<sub>30</sub>O<sub>5</sub>Na, 373.1985). Crystal data for **2**, size 0.19 × 0.15 × 0.12 mm<sup>3</sup>, orthorhombic, space group P21, *a* = 6.6713 (2) Å, *b* = 19.5694 (7) Å, *c* = 7.1999 (2) Å, *V* = 939.04 (5) Å<sup>3</sup>, *T* = 293.0 K, *Z* = 2, *D* = 1.303 Mg/m<sup>3</sup>, λ (CuKα) = 1.54178 Å, *F*(000) = 400, reflections collected/unique 11475/3259 [*R* (int) = 0.0428], *h* (−8/8), *k* (−23/23), *l* (−8/8), Final *R* indices *R*1 = 0.0492 and *wR*2 = 0.1288 (*I* > 2σ(*I*)), *R*1 = 0.0503 and *wR*2 = 0.1304 (all data), GOF = 1.040, largest diff. peak/hole, 0.459/−0.227 eÅ<sup>−3</sup>. Absolute structure parameter 0.02(9), CCDC: 2127070.

#### *Noeinsiancin C (3)*

White powder; [α]<sub>D</sub><sup>25</sup> −80.3 (*c* 0.065, CH<sub>3</sub>OH); IR (KBr) *v*<sub>max</sub> 3412, 2960, 2916, 2870, 1732, 1690, 1602, 1466, 1447, 1252, 1196, 1088, 1013, 996, 789 cm<sup>−1</sup>; <sup>1</sup>H- and <sup>13</sup>C-NMR data (500 MHz/125 MHz), see Tables S2 and S1; positive HRESIMS *m/z* 373.1960 ([M+Na]<sup>+</sup>, calcd for C<sub>20</sub>H<sub>30</sub>O<sub>5</sub>Na, 373.1985).

#### *Noeinsiancin D (4)*

Colorless needle crystals; [α]<sub>D</sub><sup>25</sup> −108.3 (*c* 0.06, CH<sub>3</sub>OH); IR (KBr) *v*<sub>max</sub> 3199, 2945, 2872, 1738, 1708, 1466, 1449, 1245, 1172, 1047, 976, 795, cm<sup>−1</sup>; <sup>1</sup>H- and <sup>13</sup>C-NMR data (500 MHz/125 MHz), see Tables S2 and S1; positive HRESIMS *m/z* 357.2023 ([M+Na]<sup>+</sup>, calcd for C<sub>20</sub>H<sub>30</sub>O<sub>4</sub>Na, 357.2036). Crystal data for **4**: size 0.200 × 0.150 × 0.130 mm<sup>3</sup>, orthorhombic, space group P 21, *a* = 11.7128 (3) Å, *b* = 7.9902 (2) Å, *c* = 11.8269 (3) Å, *V* = 1001.54 (4) Å<sup>3</sup>, *T* = 293 K, *Z* = 2, *D* = 1.215 Mg/m<sup>3</sup>, λ (CuKα) = 1.541789 Å, *F*(000) = 400, reflections collected/unique 123977/3447 [*R* (int) = 0.0331], *h* (−13/13), *k* (−8/9), *l* (−13/14), Final *R* indices *R*1 = 0.0302 and *wR*2 = 0.0800 (*I* > 2σ(*I*)), *R*1 = 0.0310 and *wR*2 = 0.0911 (all data), GOF = 1.047, largest diff. peak/hole, 0.124/−0.094 eÅ<sup>−3</sup>. Absolute structure parameter 0.09(6), CCDC: 2090338.

### *Noeinsiancin E (5)*

Colorless needle crystals;  $[\alpha]_{25}^D$  -140.2 (c 0.10, CH<sub>3</sub>OH); IR (KBr)  $\nu_{\max}$  3370, 2964, 2869, 1714, 1448, 1366, 1288, 1169, 1018, 976, 755, cm<sup>-1</sup>; <sup>1</sup>H- and <sup>13</sup>C-NMR data (500 MHz/125 MHz), see Tables S2 and S1; positive HRESIMS  $m/z$  357.2023 ([M+Na]<sup>+</sup>, calcd for C<sub>20</sub>H<sub>30</sub>O<sub>4</sub>Na, 357.2036). Crystal data for **5**: size 0.200 × 0.160 × 0.130 mm<sup>3</sup>, orthorhombic, space group P 1,  $a = 6.4700$  (4) Å,  $b = 7.6635$  (5) Å,  $c = 9.8461$  (6) Å,  $V = 447.19$  (5) Å<sup>3</sup>,  $T = 293$  K,  $Z = 1$ ,  $D = 1.242$  Mg/m<sup>3</sup>,  $\lambda$  (CuK $\alpha$ ) = 1.541789 Å,  $F(000) = 182$ , reflections collected/unique 13755/2977 [ $R$  (int) = 0.0359],  $h$  (-7/7),  $k$  (-9/9),  $l$  (-11/11), Final  $R$  indices  $R1 = 0.0304$  and  $wR2 = 0.0799$  ( $I > 2\sigma(I)$ ),  $R1 = 0.0305$  and  $wR2 = 0.0800$  (all data), GOF = 1.069, largest diff. peak/hole, 0.138/-0.097 eÅ<sup>-3</sup>. Absolute structure parameter 0.07(4), *CCDC*: 2090337.

### *Noeinsiancin F (6)*

Colorless needle crystals;  $[\alpha]_{25}^D$  -116.7 (c 0.05, CH<sub>3</sub>OH); IR (KBr)  $\nu_{\max}$  3426, 2931, 1723, 1467, 1447, 1373, 1270, 1168, 1065, 977, 787 cm<sup>-1</sup>; <sup>1</sup>H- and <sup>13</sup>C-NMR data (500 MHz/125 MHz), see Tables S2 and S1; positive HRESIMS  $m/z$  355.1861 ([M+Na]<sup>+</sup>, calcd for C<sub>20</sub>H<sub>28</sub>O<sub>4</sub>Na, 355.1880). Crystal data for **6**: size 0.15 × 0.07 × 0.05 mm<sup>3</sup>, orthorhombic, space group P 1.21.1,  $a = 6.4502$  (3) Å,  $b = 14.2302$  (6) Å,  $c = 9.9729$  (4) Å,  $V = 905.16$  (7) Å<sup>3</sup>,  $T = 293$  K,  $Z = 2$ ,  $D = 1.220$  Mg/m<sup>3</sup>,  $\lambda$  (CuK $\alpha$ ) = 1.34139 Å,  $F(000) = 360$ , reflections collected/unique 11155/3409 [ $R$  (int) = 0.0564],  $h$  (-7/7),  $k$  (-17/17),  $l$  (-12/12), Final  $R$  indices  $R1 = 0.0407$  and  $wR2 = 0.1083$  ( $I > 2\sigma(I)$ ),  $R1 = 0.0431$  and  $wR2 = 0.1090$  (all data), GOF = 1.080, largest diff. peak/hole, 0.138/-0.097 eÅ<sup>-3</sup>. Absolute structure parameter 0.01(11), *CCDC*: 2156441.

### *Noeinsiancin G (7)*

White powder;  $[\alpha]_{25}^D$  -139.3 (c 0.15, CH<sub>3</sub>OH); IR (KBr)  $\nu_{\max}$  3245, 2934, 2874,

1770, 1470, 1447, 1372, 1271, 1172, 1065, 976, 789 cm<sup>-1</sup>; <sup>1</sup>H- and <sup>13</sup>C-NMR data (500 MHz/125 MHz), see Tables S3 and S1; positive HRESIMS 355.1860 ([M+Na]<sup>+</sup>, calcd for C<sub>20</sub>H<sub>28</sub>O<sub>4</sub>Na, 355.1880)

*Noeinsiancin H (8)*

Colorless needle crystals; [ $\alpha$ ]<sub>D</sub><sup>25</sup> -85.8 (c 0.06, CH<sub>3</sub>OH); IR (KBr)  $\nu_{\max}$  3253, 2926, 2857, 1700, 1596, 1447, 1394, 1297, 1167, 1079, 976, 758 cm<sup>-1</sup>; <sup>1</sup>H- and <sup>13</sup>C-NMR data (500 MHz/125 MHz), see Tables S3 and S1; positive HRESIMS  $m/z$  357.2023 ([M+Na]<sup>+</sup>, calcd for C<sub>20</sub>H<sub>30</sub>O<sub>4</sub>Na, 357.2036). Crystal data for **8**: size 0.05 × 0.105 × 0.01 mm<sup>3</sup>, orthorhombic, space group P2<sub>1</sub>2<sub>1</sub>2<sub>1</sub>,  $a = 7.4299$  (10) Å,  $b = 10.3592$  (2) Å,  $c = 23.4977$  (3) Å,  $V = 1808.57$  (5) Å<sup>3</sup>,  $T = 173$  K,  $Z = 4$ ,  $D = 1.294$  Mg/m<sup>3</sup>,  $\lambda$  (CuK $\alpha$ ) = 1.34139 Å,  $F(000) = 768$ , reflections collected/unique 129313420 [ $R$  (int) = 0.0399],  $h$  (-8/9),  $k$  (-12/12),  $l$  (-24/28), Final  $R$  indices  $R1 = 0.0576$  and  $wR2 = 0.0799$  ( $I > 2\sigma(I)$ ),  $R1 = 0.0305$  and  $wR2 = 0.0800$  (all data), GOF = 1.069, largest diff. peak/hole, 0.138/-0.097 eÅ<sup>-3</sup>. Absolute structure parameter 0.07(4), CCDC: 2090340.

*Noeinsiancin I (9)*

Colorless needle crystals; [ $\alpha$ ]<sub>D</sub><sup>25</sup> -91.3 (c 0.05, CH<sub>3</sub>OH); IR (KBr)  $\nu_{\max}$  3421, 2941, 1695, 1467, 1444, 1370, 1284, 1160, 1066, 990, 793 cm<sup>-1</sup>; <sup>1</sup>H- and <sup>13</sup>C-NMR data (500 MHz/125 MHz), see Tables S3 and S1; positive HRESIMS  $m/z$  375.2123 ([M+Na]<sup>+</sup>, calcd for C<sub>20</sub>H<sub>32</sub>O<sub>5</sub>Na, 375.2142). Crystal data for **9**: size 0.20 × 0.14 × 0.10 mm<sup>3</sup>, orthorhombic, space group P 2<sub>1</sub>,  $a = 8.4122$  (2) Å,  $b = 19.7326$  (6) Å,  $c = 11.0321$  (3) Å,  $V = 1829.87$  (9) Å<sup>3</sup>,  $T = 293$  K,  $Z = 4$ ,  $D = 1.279$  Mg/m<sup>3</sup>,  $\lambda$  (CuK $\alpha$ ) = 1.54178 Å,  $F(000) = 768$ , reflections collected/unique 21478/6401 [ $R$  (int) = 0.0438],  $h$  (-10/10),  $k$  (-23/23),  $l$  (-12/13), Final  $R$  indices  $R1 = 0.0322$  and  $wR2 = 0.0841$  ( $I > 2\sigma(I)$ ),  $R1 = 0.0327$  and  $wR2 = 0.0846$  (all data), GOF = 1.052, largest diff. peak/hole, 0.151/-0.138 eÅ<sup>-3</sup>.

Absolute structure parameter -0.02(5), *CCDC: 2127071*.

*Noeinsiancin J (10)*

White powder;  $[\alpha]_{25}^D$  -87.0 (c 0.10, CH<sub>3</sub>OH); IR (KBr)  $\nu_{\max}$  3366, 2937, 2898, 1696, 1470, 1408, 1384, 1325, 1264, 1180, 1051, 996, 798 cm<sup>-1</sup>; <sup>1</sup>H- and <sup>13</sup>C-NMR data (500 MHz/125 MHz), see Tables S3 and S1; positive HRESIMS  $m/z$  375.2121 ([M+Na]<sup>+</sup>, calcd for C<sub>20</sub>H<sub>32</sub>O<sub>5</sub>Na, 375.2142).

*Noeinsiancin K (11)*

White powder;  $[\alpha]_{25}^D$  -96.0 (c 0.05, CH<sub>3</sub>OH); IR (KBr)  $\nu_{\max}$  3483, 2950, 2869, 1721, 1683, 1469, 1402, 1368, 1230, 1160, 1038, 977, 803 cm<sup>-1</sup>; <sup>1</sup>H- and <sup>13</sup>C-NMR data (500 MHz/125 MHz), see Tables S3 and S1; positive HRESIMS  $m/z$  373.1966 ([M+Na]<sup>+</sup>, calcd for C<sub>20</sub>H<sub>30</sub>O<sub>5</sub>Na, 373.1985).

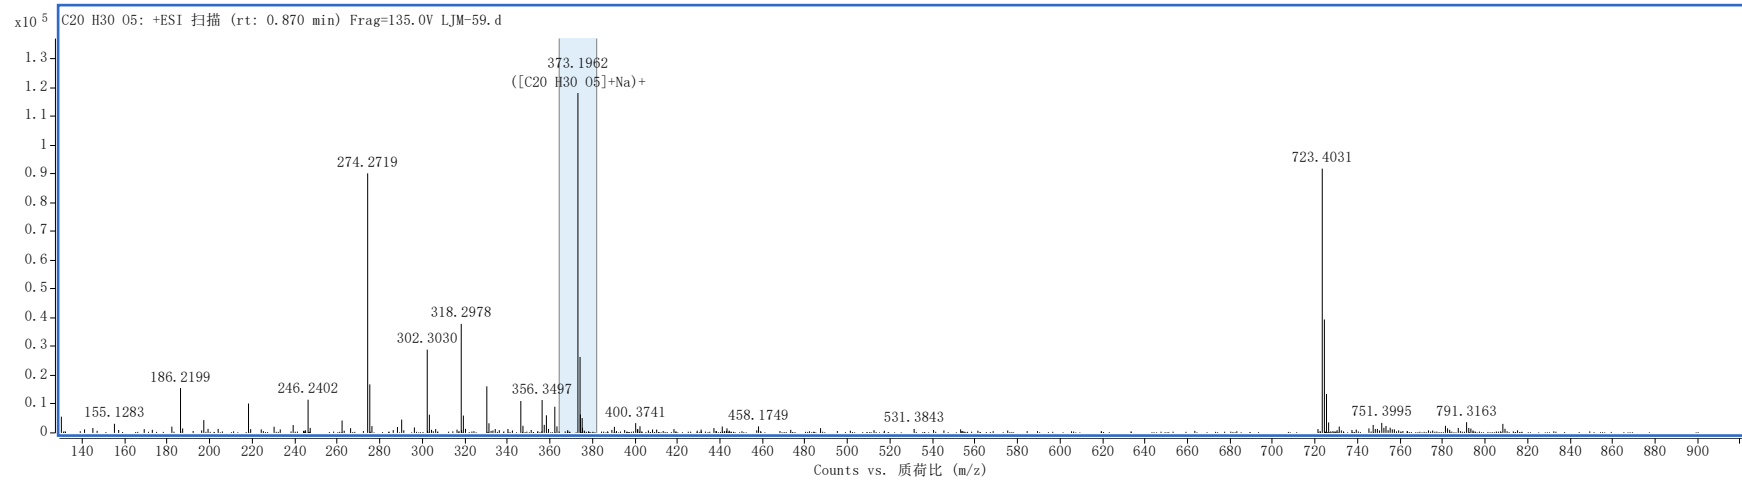

| 最佳   | ID 来源 | 分子式        | 种类      | m/z      | 分数    | Diff (ppm) | 分数 (MFG) |
|------|-------|------------|---------|----------|-------|------------|----------|
| TRUE | MFG   | C20 H30 O5 | (M+Na)+ | 373.1962 | 80.62 | 7.45       | 80.62    |

| 峰高总百分比 (Calc) | 峰高 (计算值) | 峰高百分比(计算值) | m/z (Calc) | Diff (mDa) | 峰高       | 峰高百分比 | 峰高总百分比 | m/z      | Diff (ppm) |
|---------------|----------|------------|------------|------------|----------|-------|--------|----------|------------|
| 79.7          | 119354.7 | 100        | 373.1985   | 2.3        | 118255.6 | 100   | 78.9   | 373.1962 | 6.24       |

Figure S1. HRESIMS spectrum of Noueinsiancin A (1)

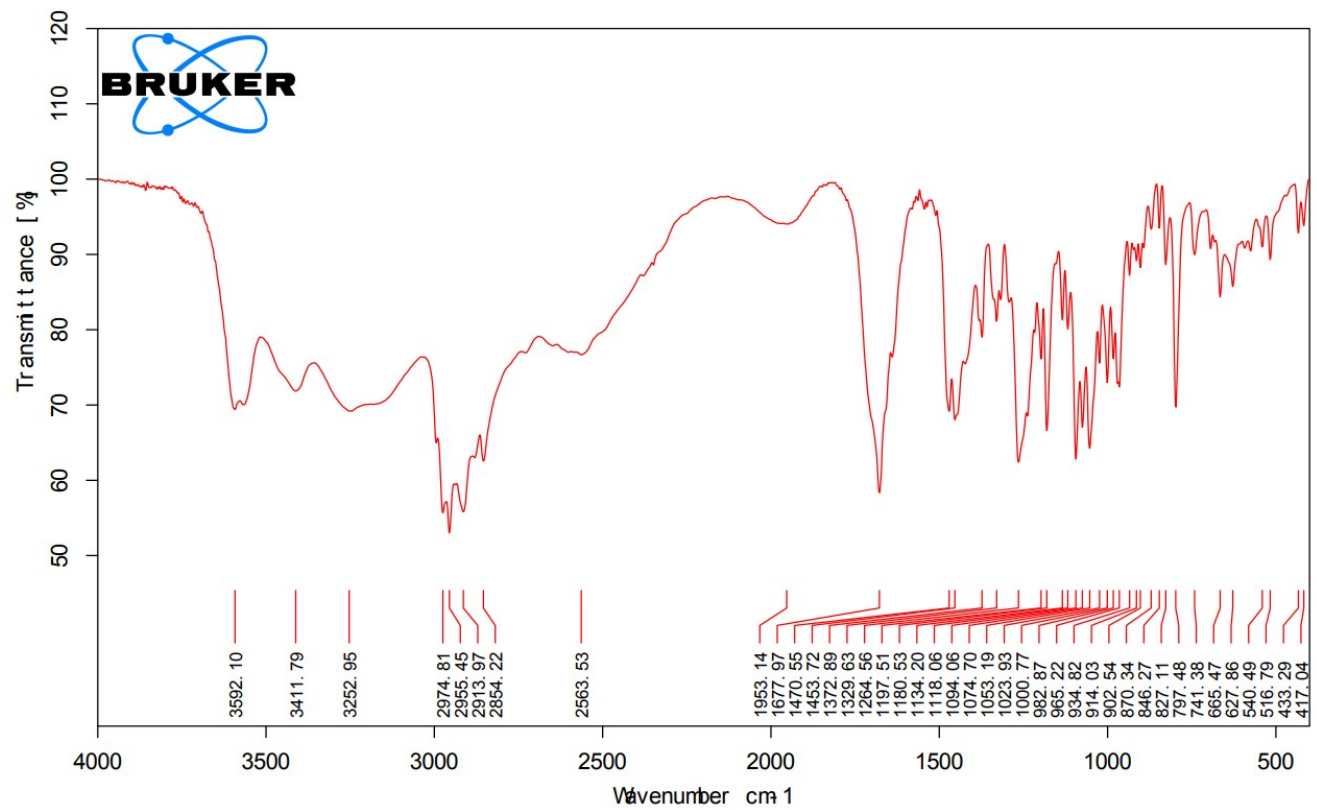

Figure S2. IR spectrum of Noueinsiancin A (1)

### Rudolph Research Analytical

Wednesday, 02/09/2022

This sample was measured on an Autopol VI, serial number 90079,  
manufactured by Rudolph Research Analytical, Hackettstown, NJ.

LotID : LJM-59  
Set Temperature : 20.0  
Temp Corr : OFF

| n | Average | Std.Dev. | Maximum | Minimum |
|---|---------|----------|---------|---------|
| 6 | -71.389 | 0.6213   | -70.000 | -71.667 |

| S.No | Sample ID | Time        | Result  | Scale | OR ° Arc | WLG | Lg.mm  | Conc. | Temp. | Comment |
|------|-----------|-------------|---------|-------|----------|-----|--------|-------|-------|---------|
| 1    | LJM-59    | 04:28:05 PM | -71.667 | SR    | -0.043   | 589 | 100.00 | 0.060 | 19.7  |         |
| 2    | LJM-59    | 04:28:11 PM | -71.667 | SR    | -0.043   | 589 | 100.00 | 0.060 | 19.7  |         |
| 3    | LJM-59    | 04:28:17 PM | -71.667 | SR    | -0.043   | 589 | 100.00 | 0.060 | 19.7  |         |
| 4    | LJM-59    | 04:28:22 PM | -71.667 | SR    | -0.043   | 589 | 100.00 | 0.060 | 19.7  |         |
| 5    | LJM-59    | 04:28:28 PM | -70.000 | SR    | -0.042   | 589 | 100.00 | 0.060 | 19.8  |         |
| 6    | LJM-59    | 04:28:34 PM | -71.667 | SR    | -0.043   | 589 | 100.00 | 0.060 | 19.8  |         |

\_\_\_\_\_  
Signature

**Figure S3. OR Value of Noueinsiancin A (1) in CH<sub>3</sub>OH**

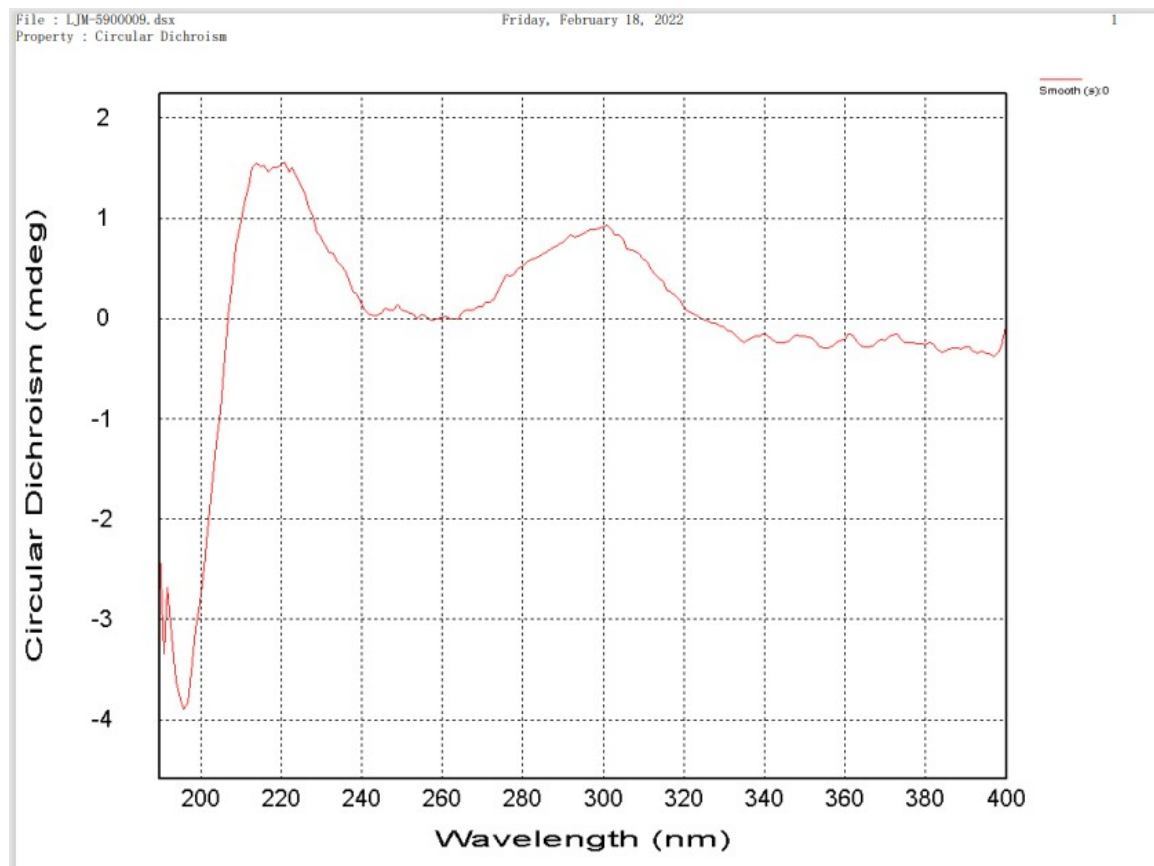

Figure S4. CD Value of Noueinsiancin A (1) in CH<sub>3</sub>OH



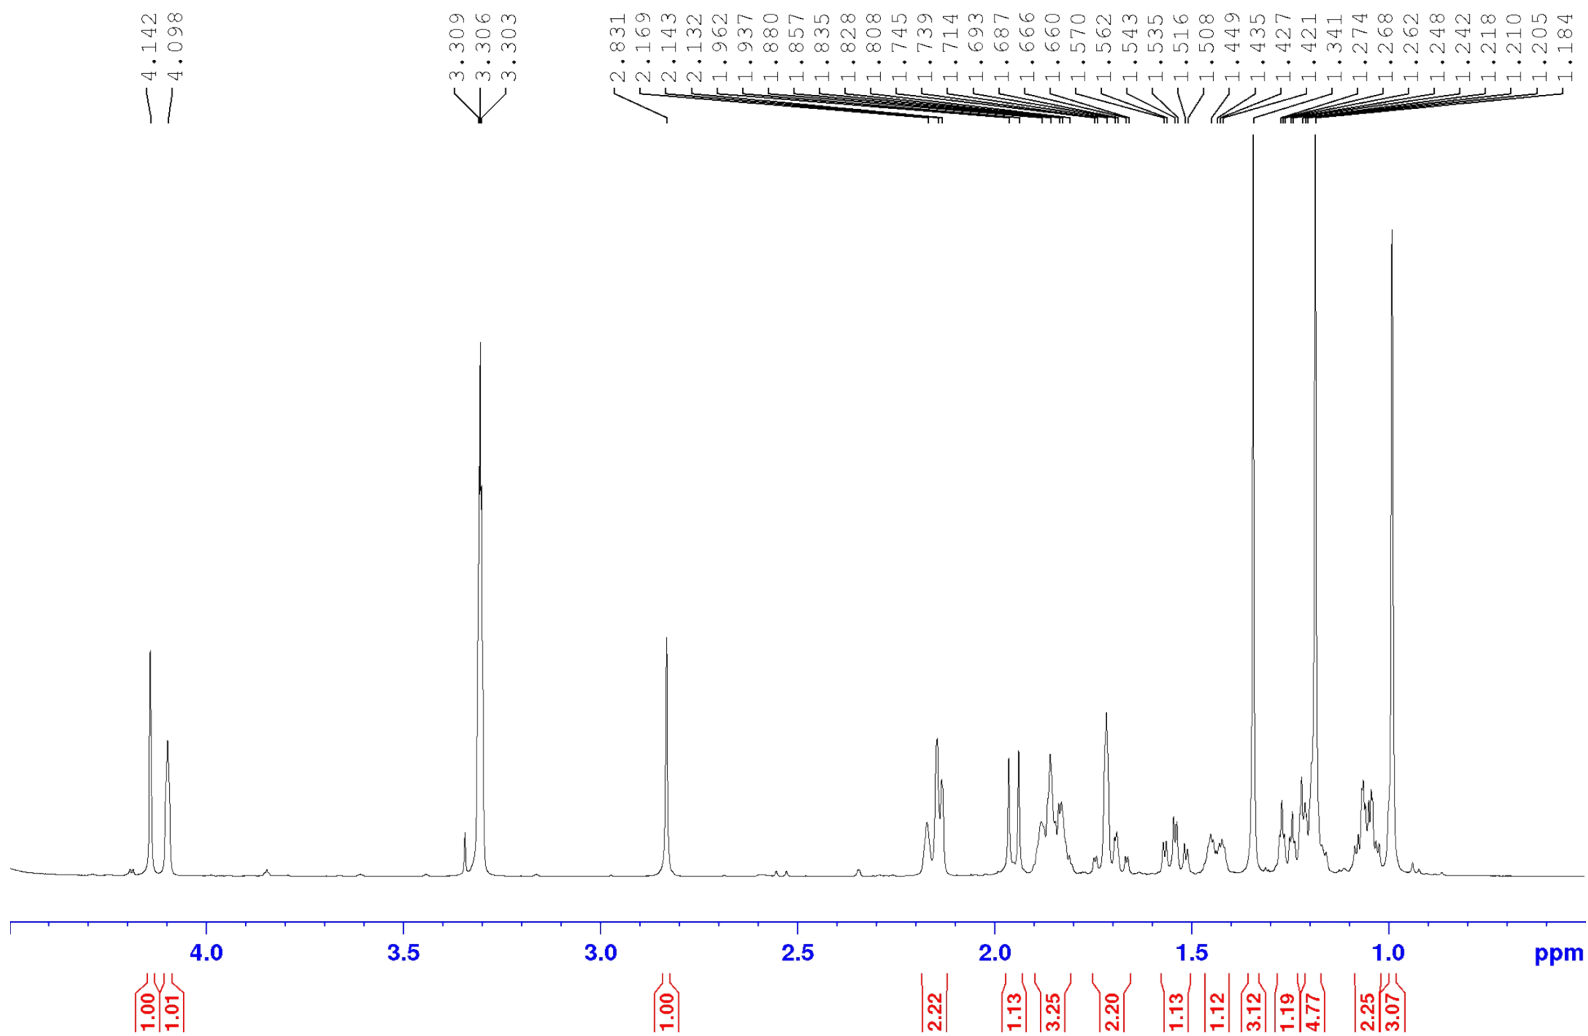

Figure S5. <sup>1</sup>H NMR spectrum of Noueinsiancins A (1) in CD<sub>3</sub>OD

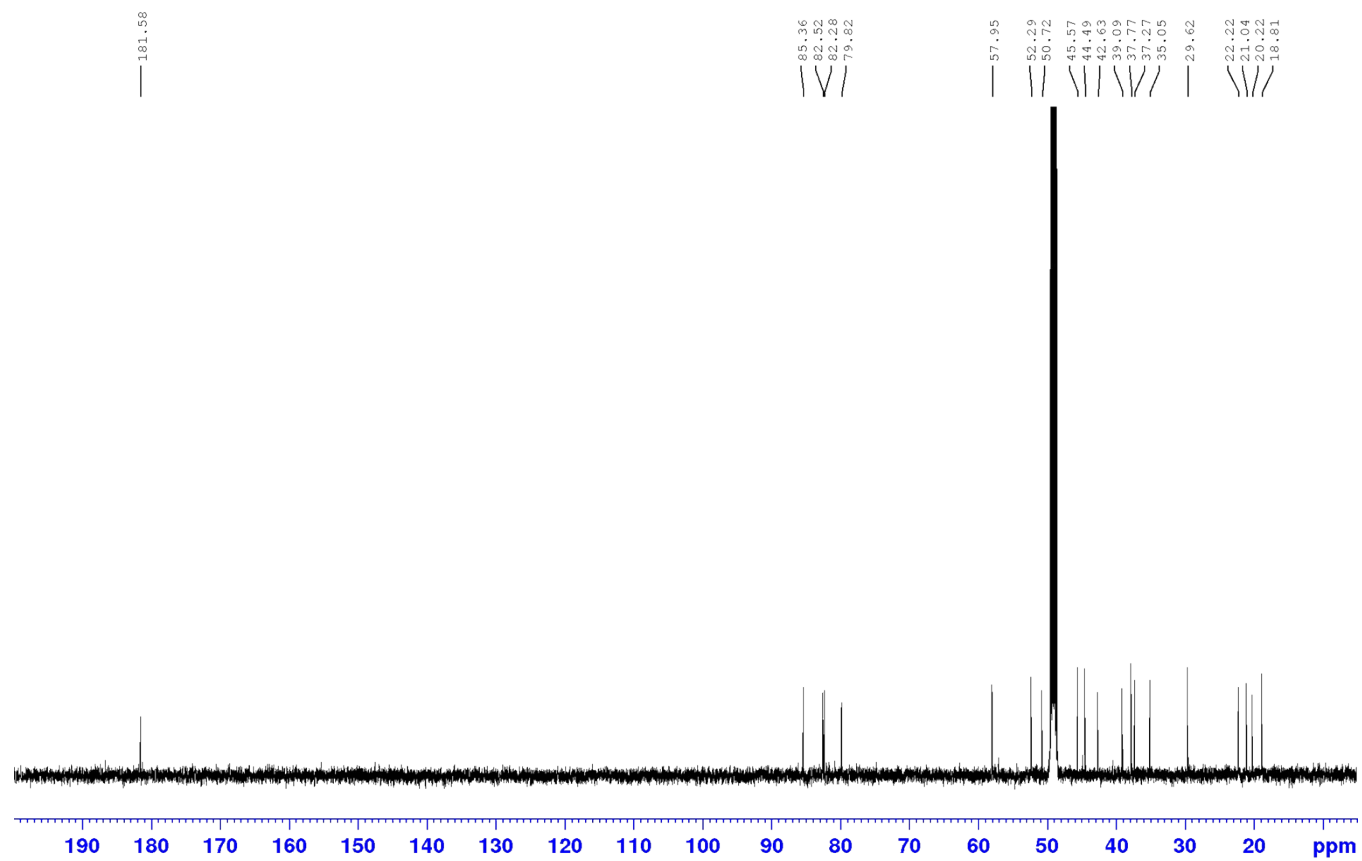

Figure S6.  $^{13}\text{C}$  NMR spectrum of Noueinsiancin A (1) in  $\text{CD}_3\text{OD}$

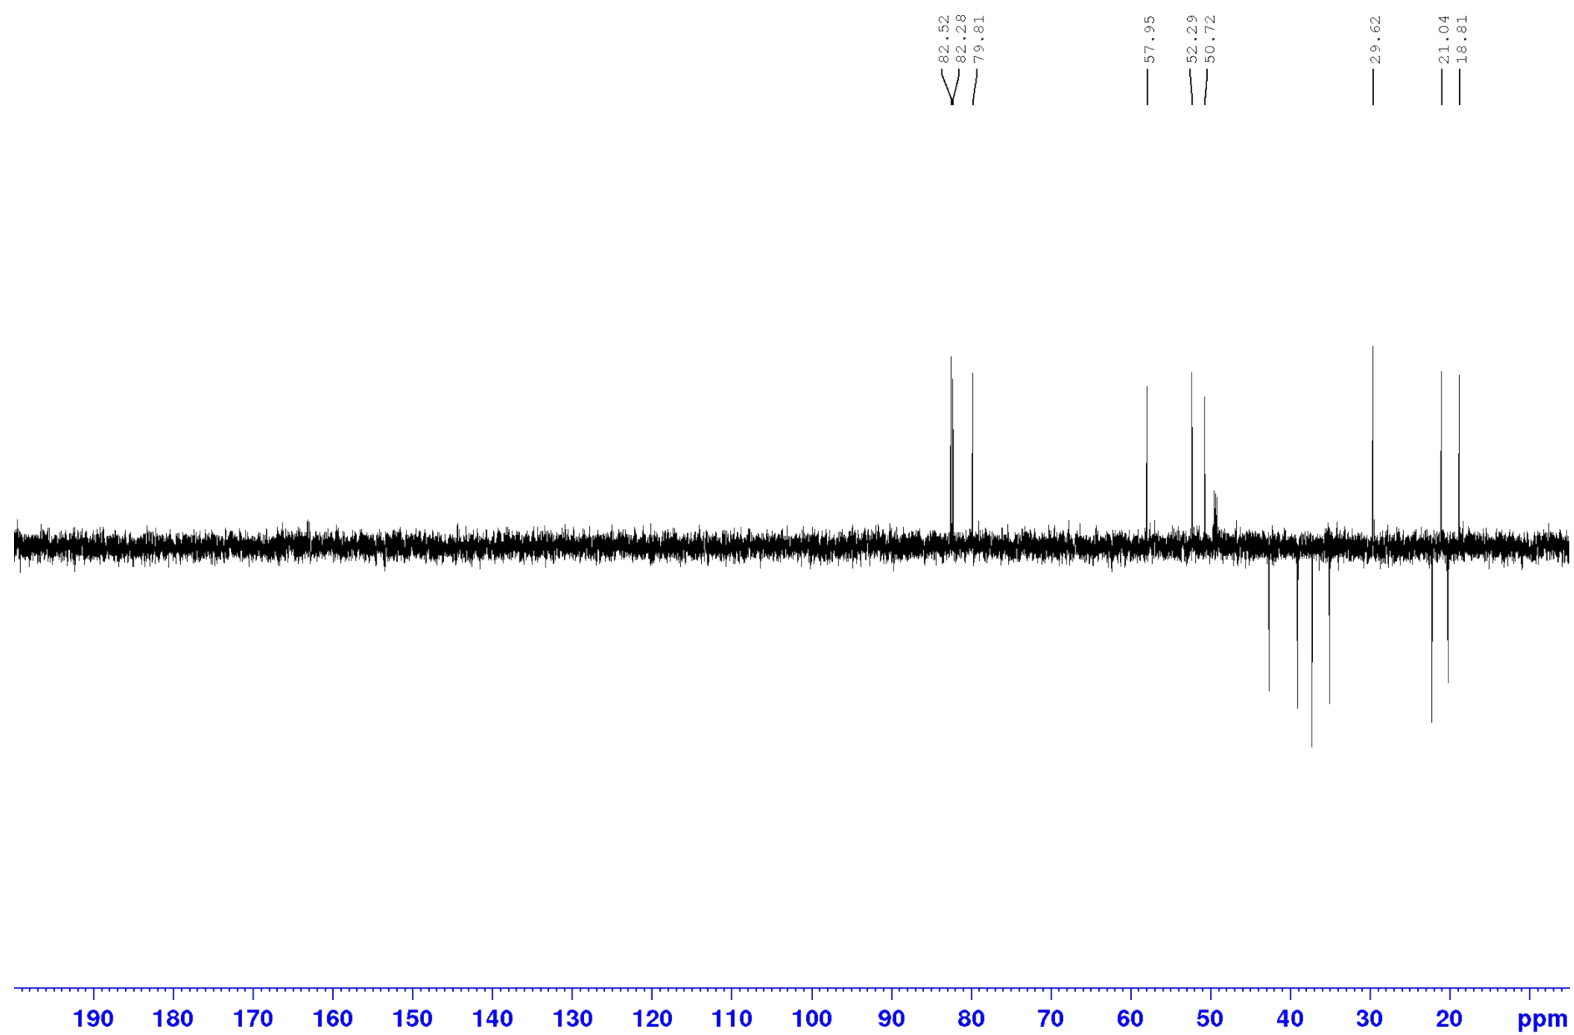

Figure S7. DEPT-135 NMR spectrum of Nouveinsiancin A (1) in CD<sub>3</sub>OD

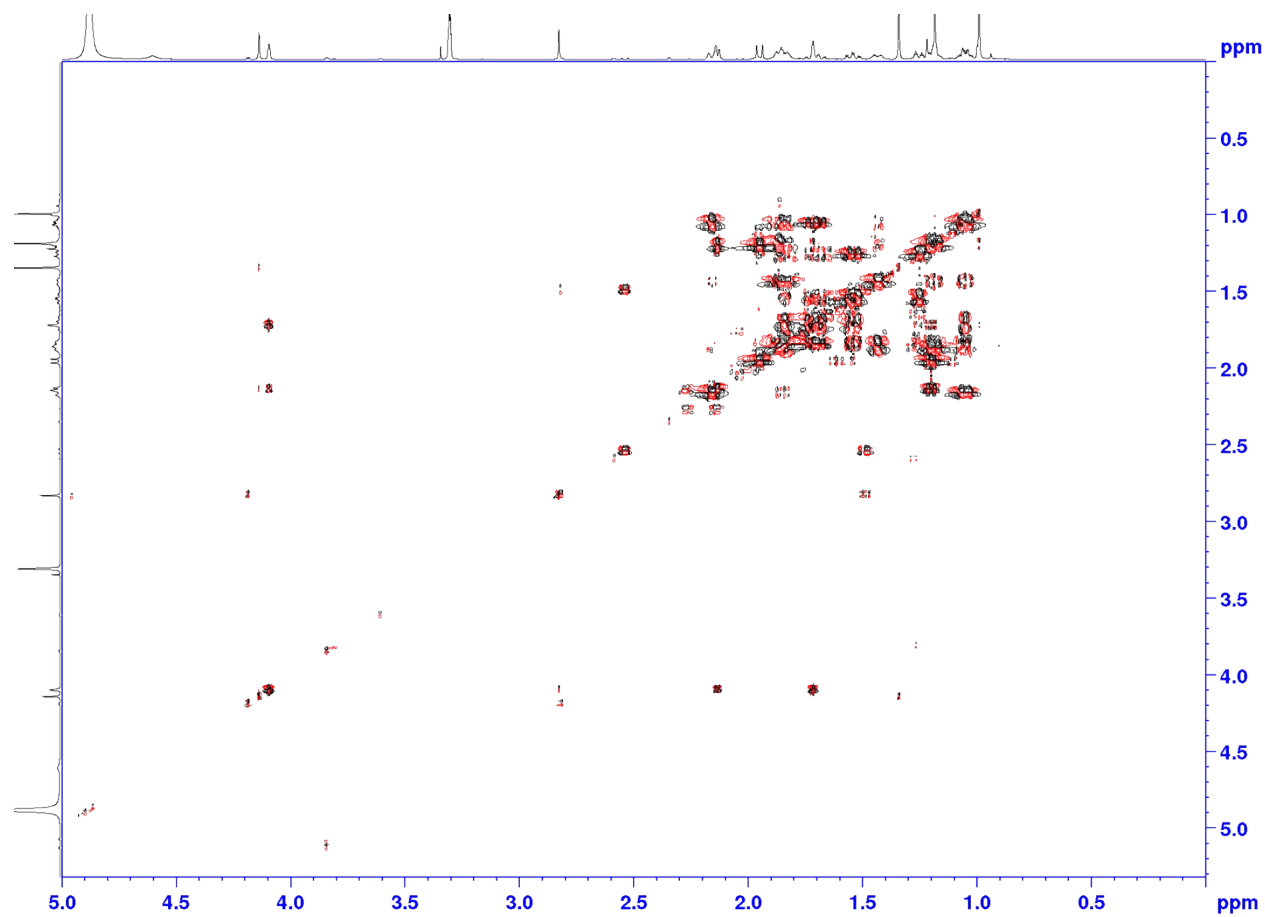

**Figure S8.**  $^1\text{H}$ - $^1\text{H}$  COSY spectrum of Noueinsiancin A (1) in  $\text{CD}_3\text{OD}$

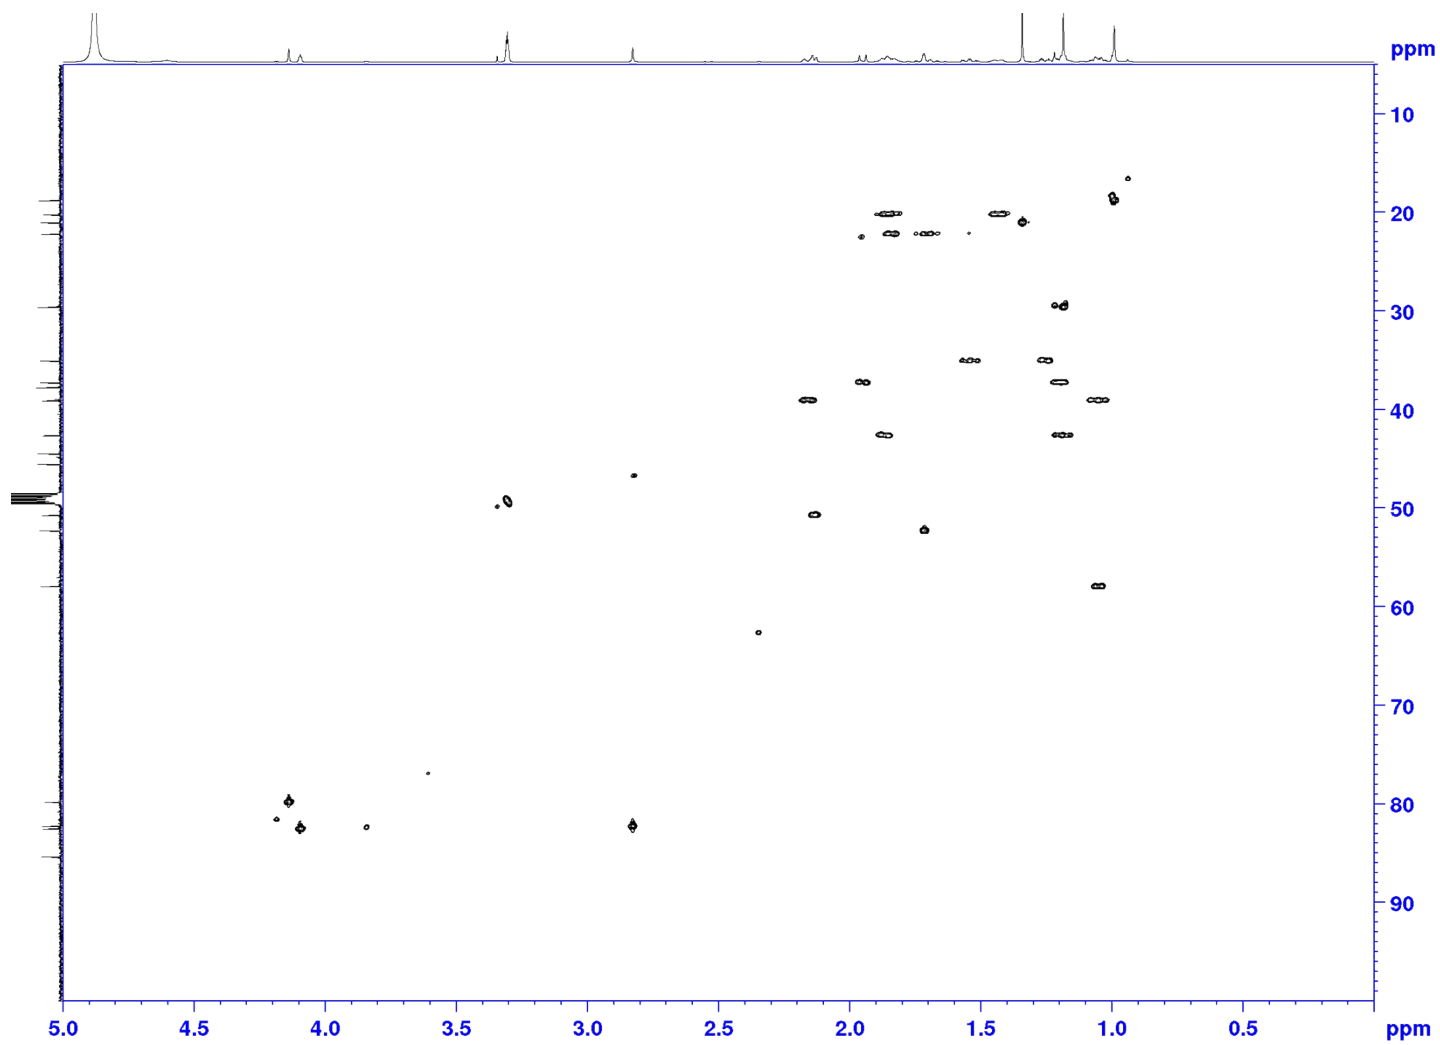

Figure S9. HSQC spectrum of Noueinsiancin A (1) in CD<sub>3</sub>OD

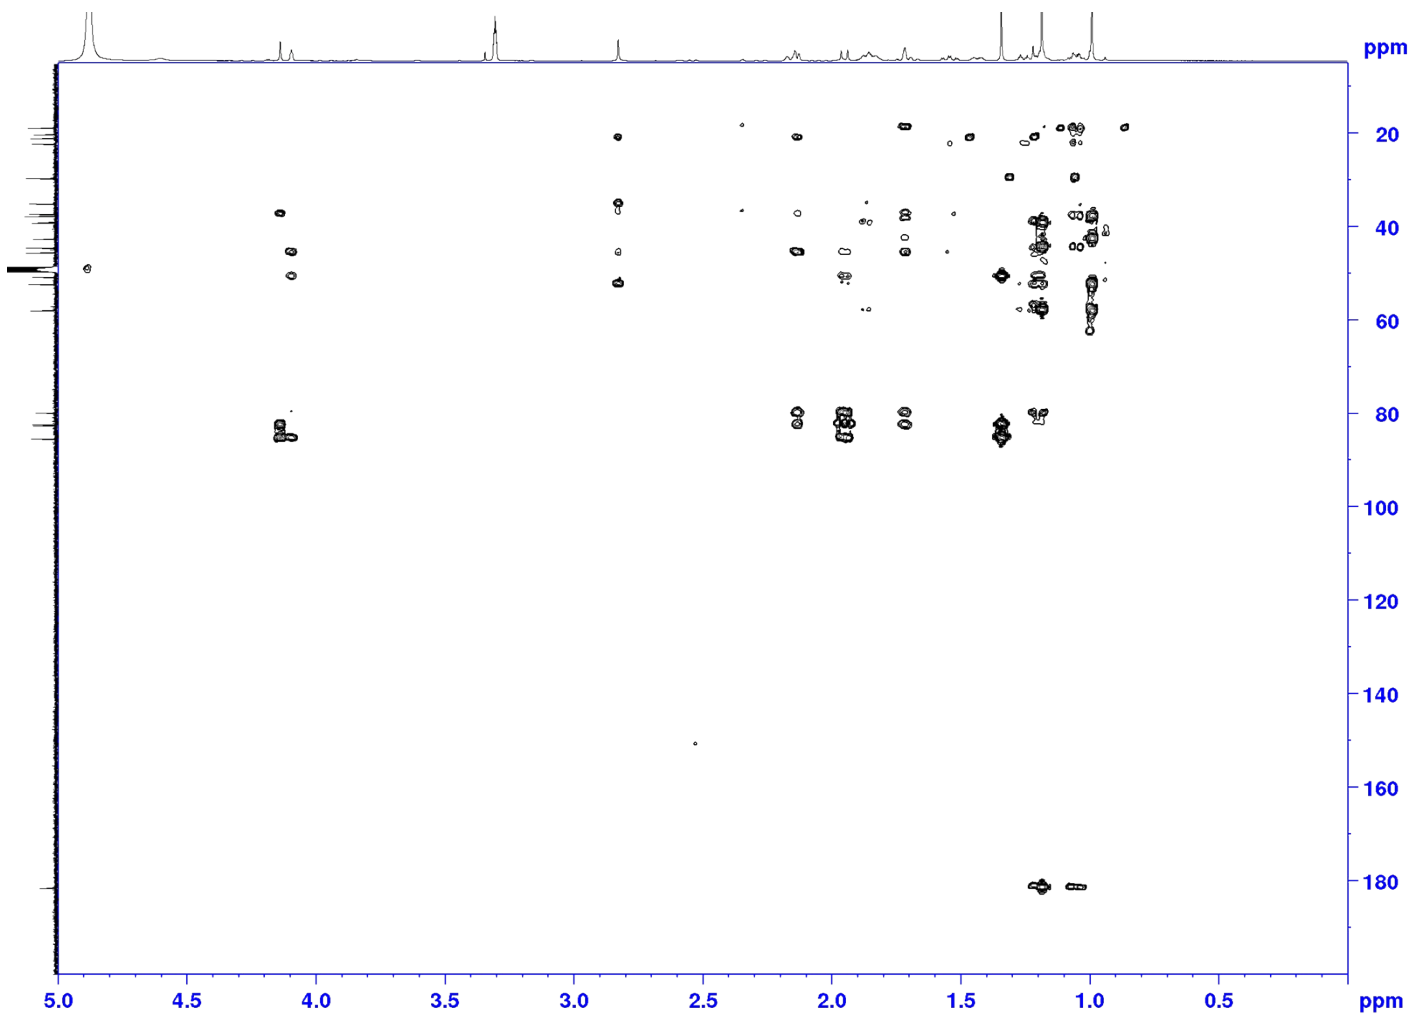

Figure S10. HMBC spectrum of Noueinsiancin A (1) in CD<sub>3</sub>OD

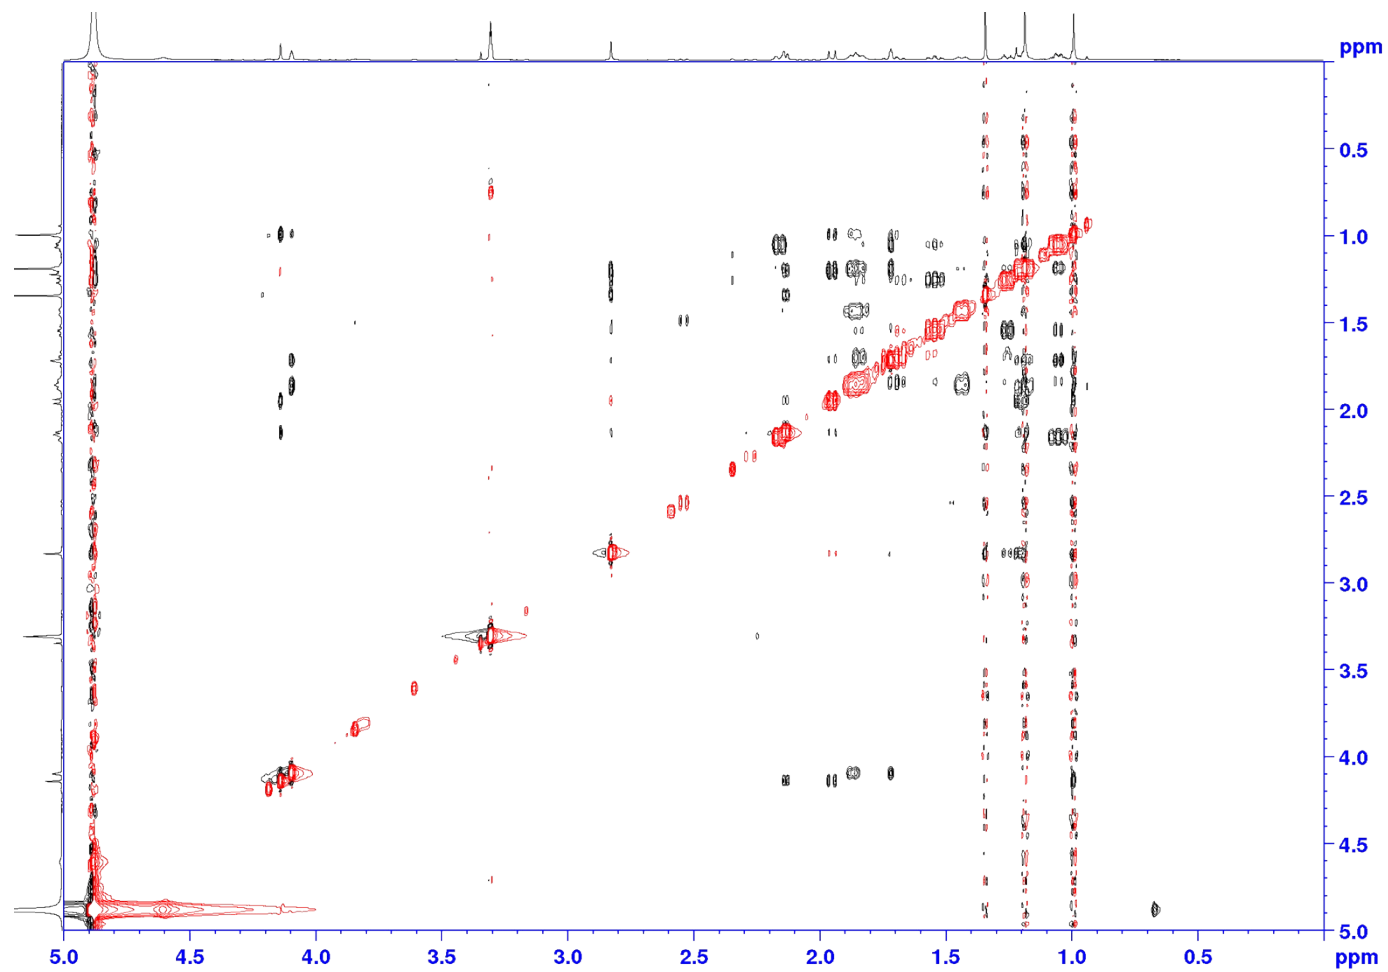

Figure S11. NOESY spectrum of Noueinsiancin A (1) in CD<sub>3</sub>OD

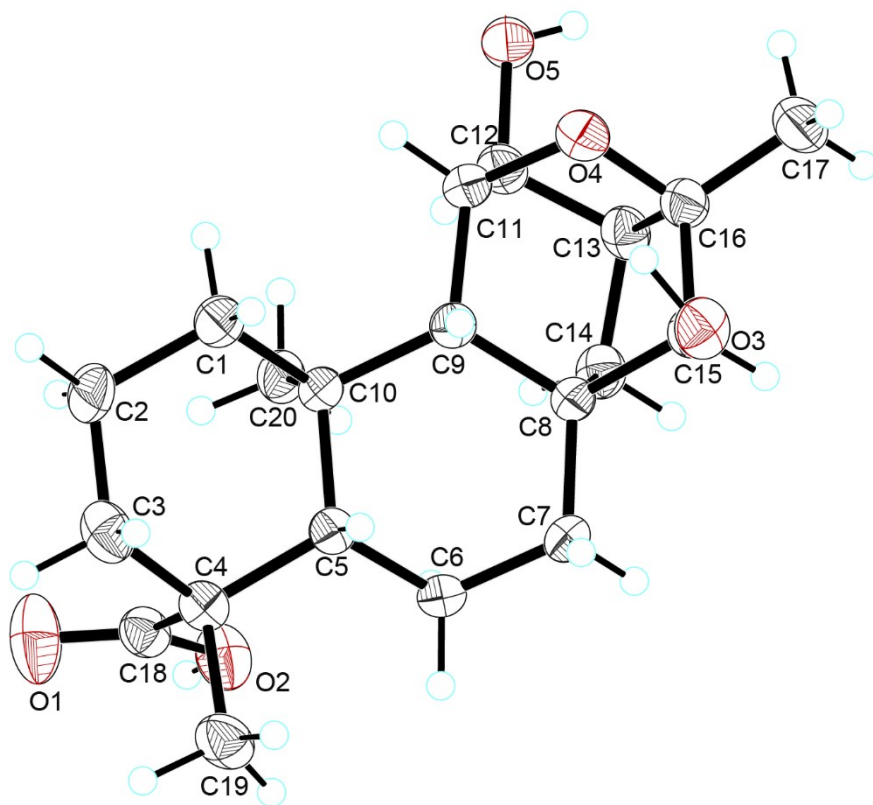

**Figure S12. X-ray structure of Nouveinsiancin A (1)**



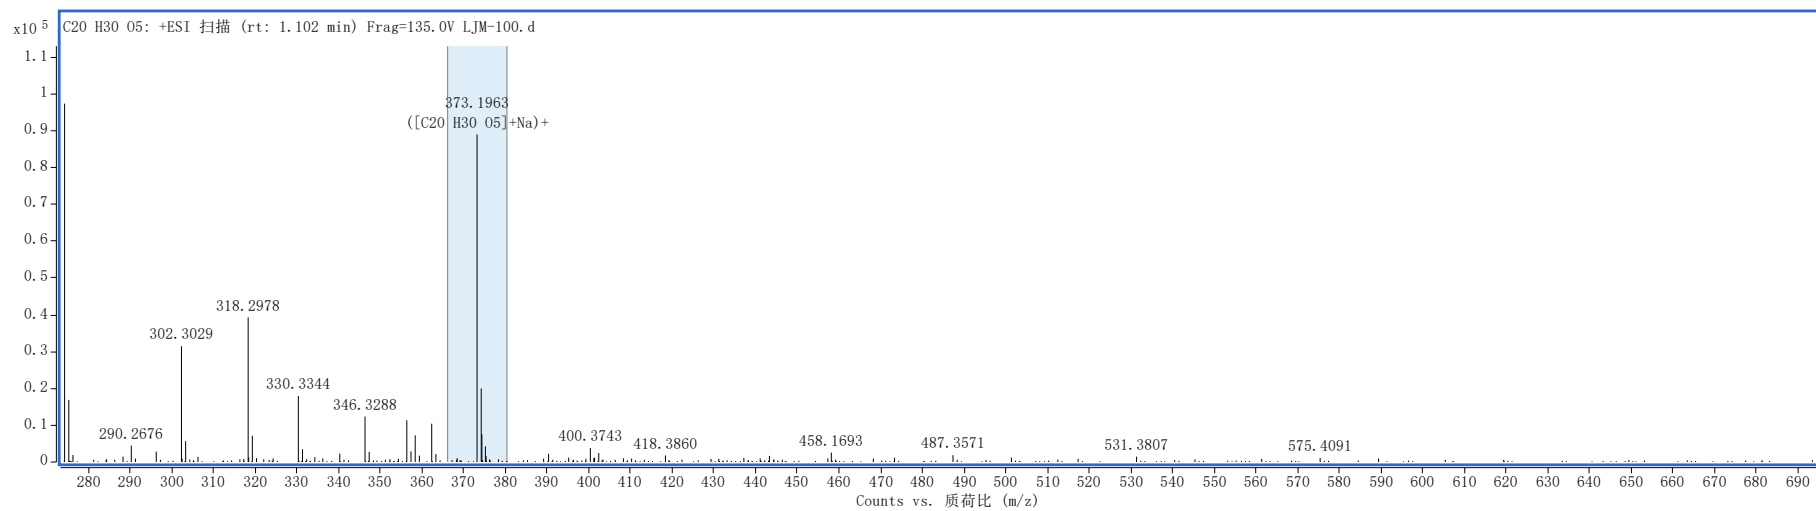

| 最佳   | ID 来源 | 分子式        | 种类      | m/z      | 分数    | Diff (ppm) | 分数 (MFG) |
|------|-------|------------|---------|----------|-------|------------|----------|
| TRUE | MFG   | C20 H30 O5 | (M+Na)+ | 373.1963 | 81.76 | 7.22       | 81.76    |

| 峰高总百分比 (Calc) | 峰高 (计算值) | 峰高百分数(计算值) | m/z (Calc) | Diff (mDa) | 峰高      | 峰高百分数 | 峰高总百分比 | m/z      | Diff (ppm) |
|---------------|----------|------------|------------|------------|---------|-------|--------|----------|------------|
| 79.7          | 90242.2  | 100        | 373.1985   | 2.2        | 89005.8 | 100   | 78.6   | 373.1963 | 6          |

Figure S13. HRESIMS spectrum of Noueinsiancin B (2)

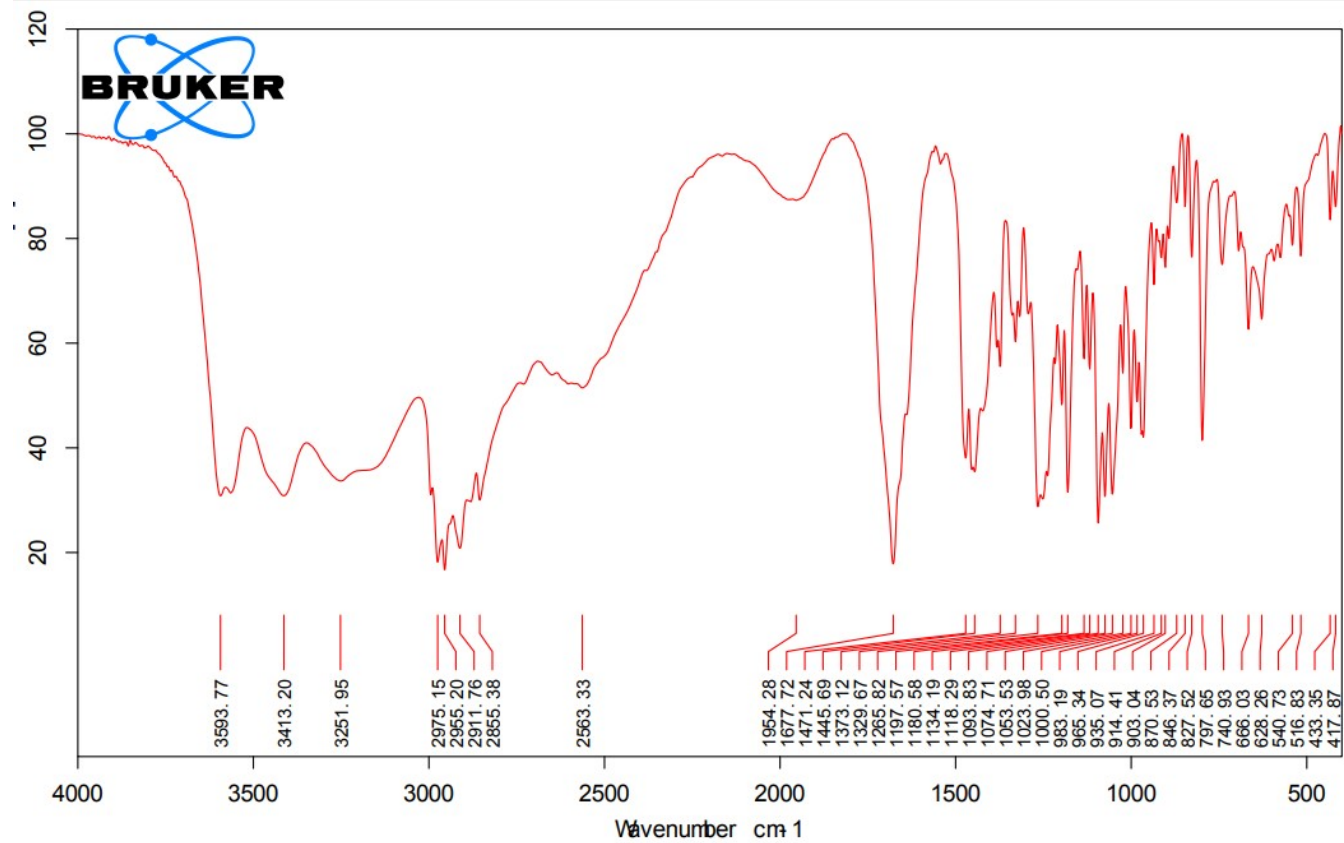

Figure S14. IR spectrum of Nouveinsiancin B (2)

**Rudolph Research Analytical**

Thursday, 02/10/2022

This sample was measured on an Autopol VI, serial number 90079,  
manufactured by Rudolph Research Analytical, Hackettstown, NJ.

LotID : LJM-100  
Set Temperature : 20.0  
Temp Corr : OFF

| n    | Average   | Std.Dev.    | Maximum | Minimum |          |     |        |       |       |         |
|------|-----------|-------------|---------|---------|----------|-----|--------|-------|-------|---------|
| 6    | -44.762   | 0.6732      | -44.286 | -45.714 |          |     |        |       |       |         |
| S.No | Sample ID | Time        | Result  | Scale   | OR ° Arc | WLG | Lg.mm  | Conc. | Temp. | Comment |
| 1    | LJM-100   | 07:18:04 PM | -45.714 | SR      | -0.032   | 589 | 100.00 | 0.070 | 19.7  |         |
| 2    | LJM-100   | 07:18:11 PM | -44.286 | SR      | -0.031   | 589 | 100.00 | 0.070 | 19.7  |         |
| 3    | LJM-100   | 07:18:17 PM | -44.286 | SR      | -0.031   | 589 | 100.00 | 0.070 | 19.7  |         |
| 4    | LJM-100   | 07:18:22 PM | -45.714 | SR      | -0.032   | 589 | 100.00 | 0.070 | 19.7  |         |
| 5    | LJM-100   | 07:18:27 PM | -44.286 | SR      | -0.031   | 589 | 100.00 | 0.070 | 19.8  |         |
| 6    | LJM-100   | 07:18:33 PM | -44.286 | SR      | -0.031   | 589 | 100.00 | 0.070 | 19.8  |         |

\_\_\_\_\_  
Signature

**Figure S15. OR Value of Noueinsiancin B (2) in CH<sub>3</sub>OH**

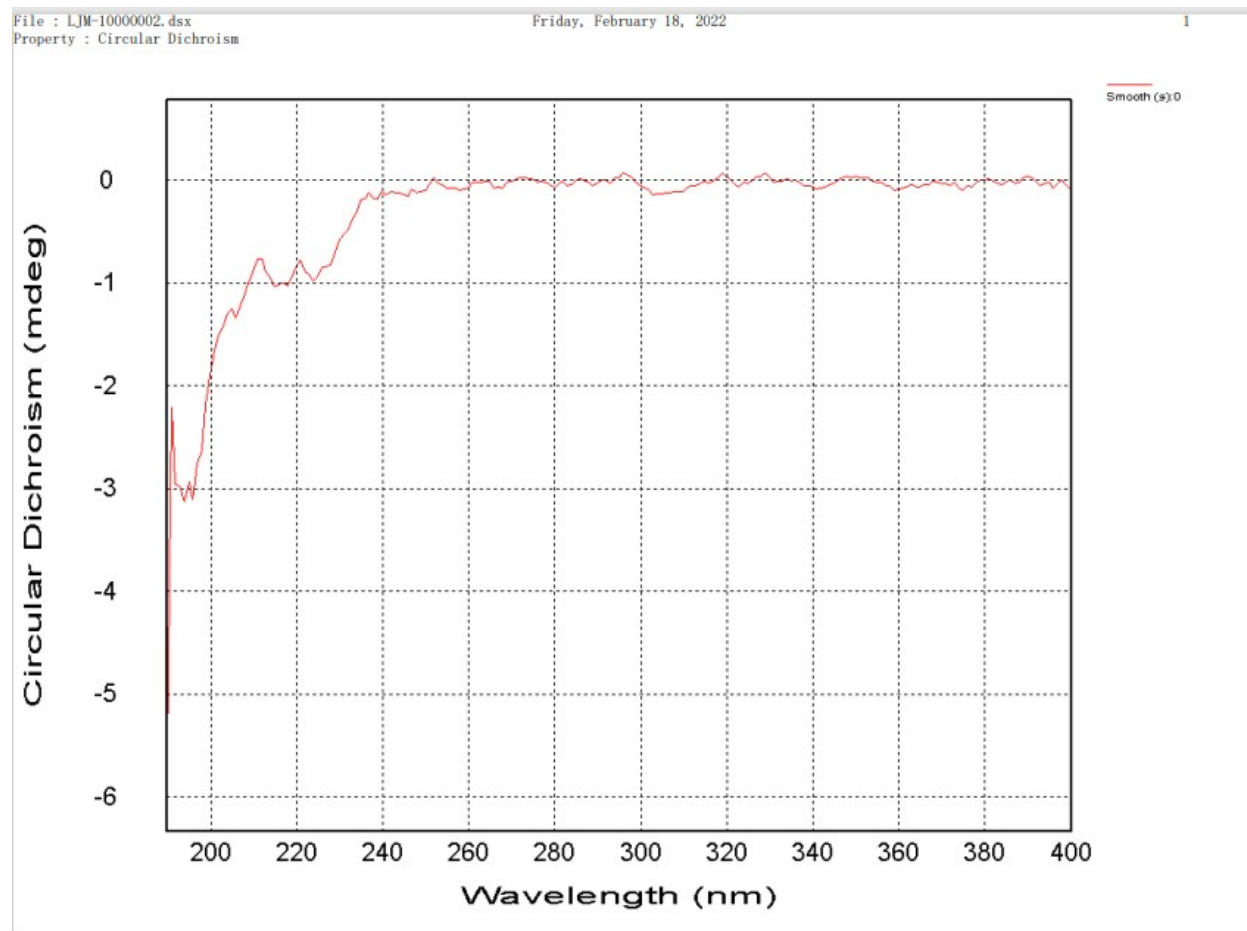

Figure S16. CD Value of Noueinsiancin B (2) in CH<sub>3</sub>OH

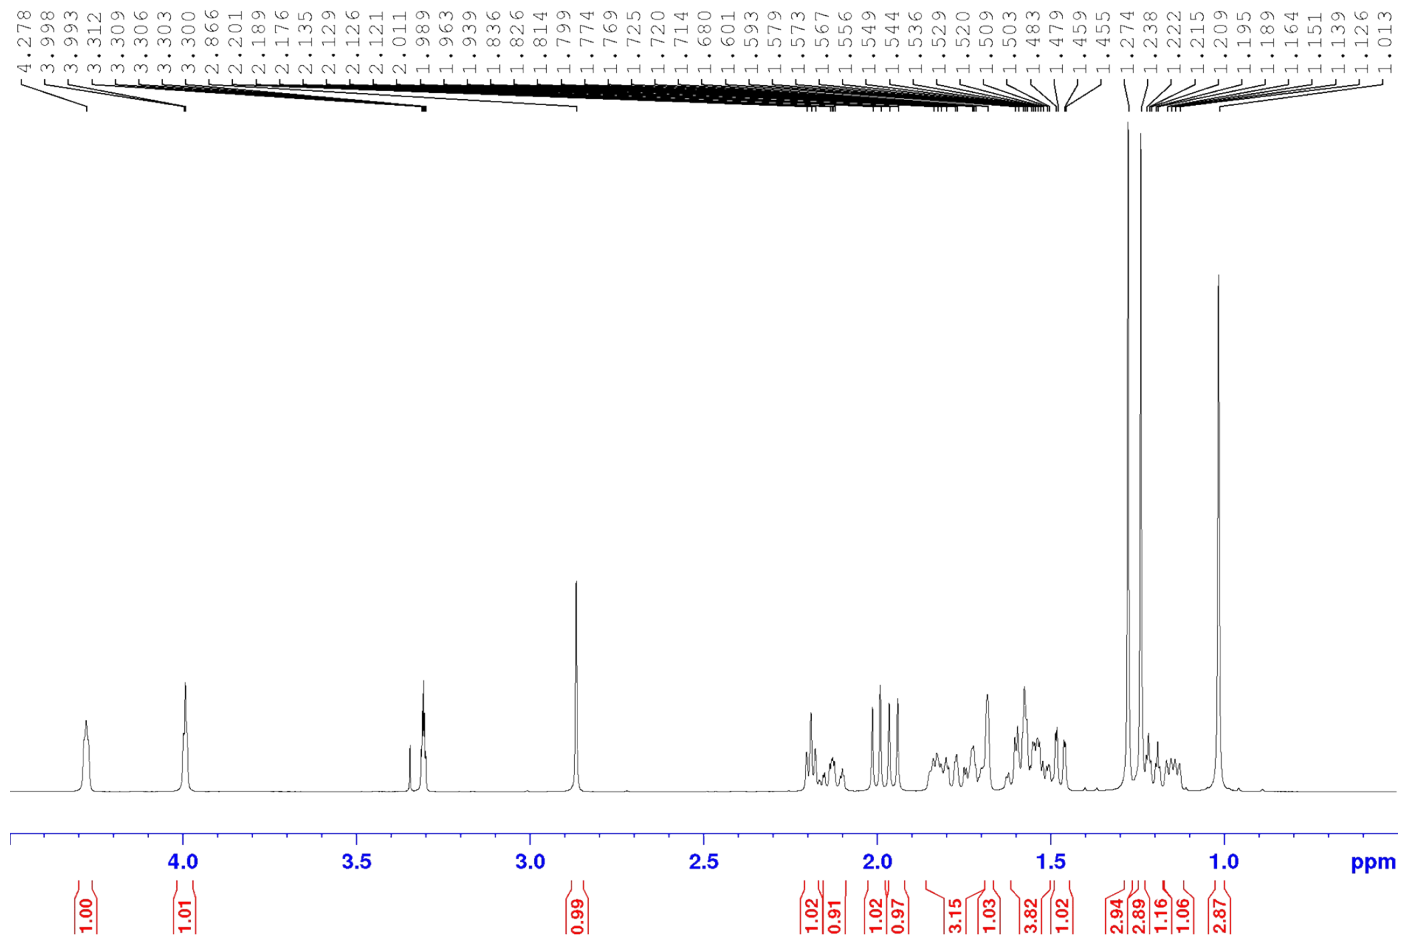

Figure S17. <sup>1</sup>H NMR spectrum of Noueinsiancin B (2) in CD<sub>3</sub>OD

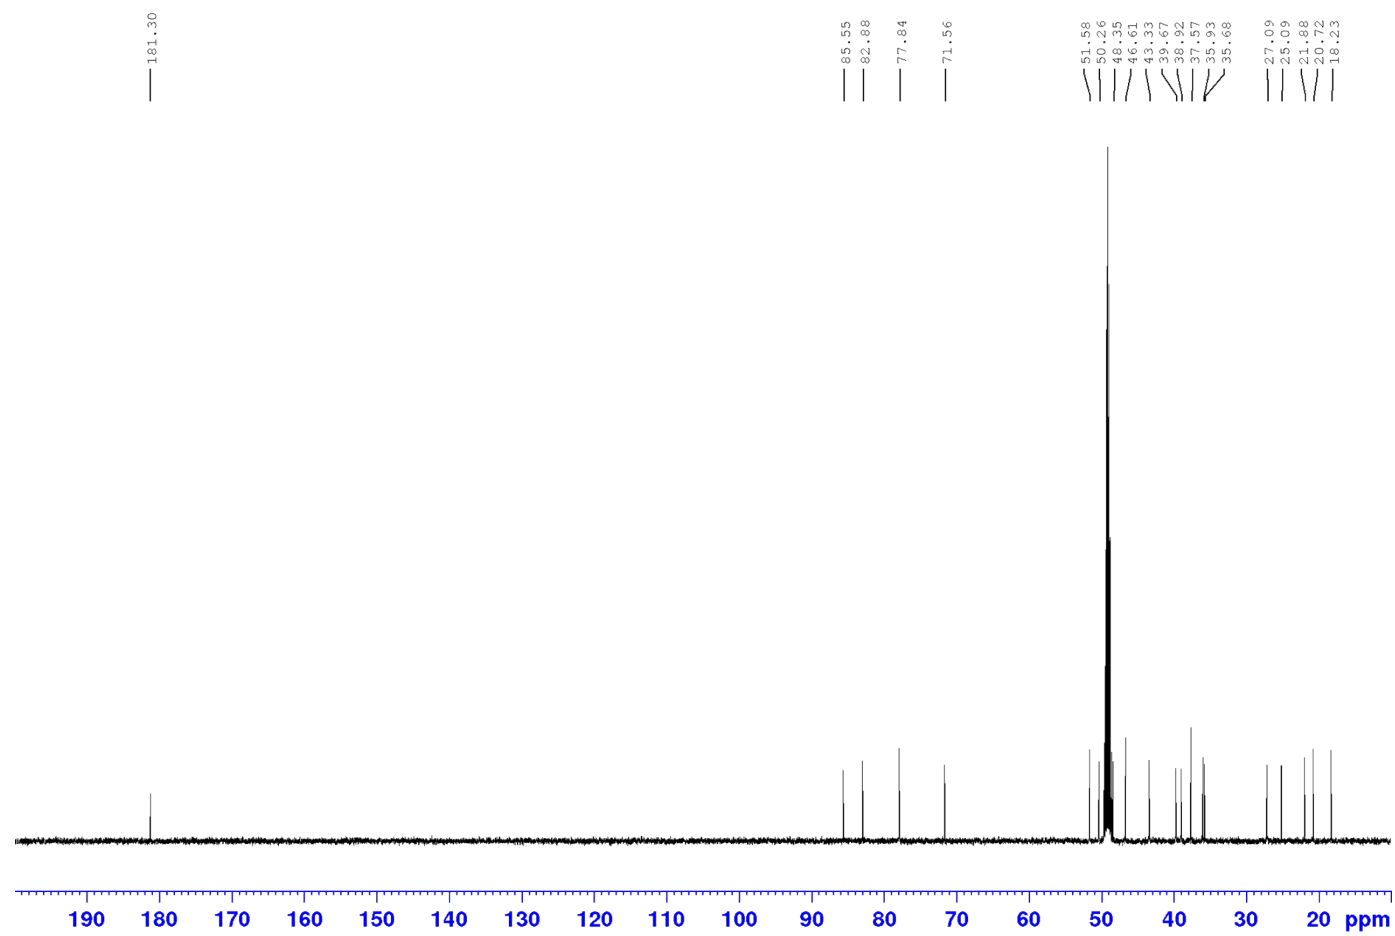

Figure S18. <sup>13</sup>C NMR spectrum of Noueinsiancin B (2) in CD<sub>3</sub>OD

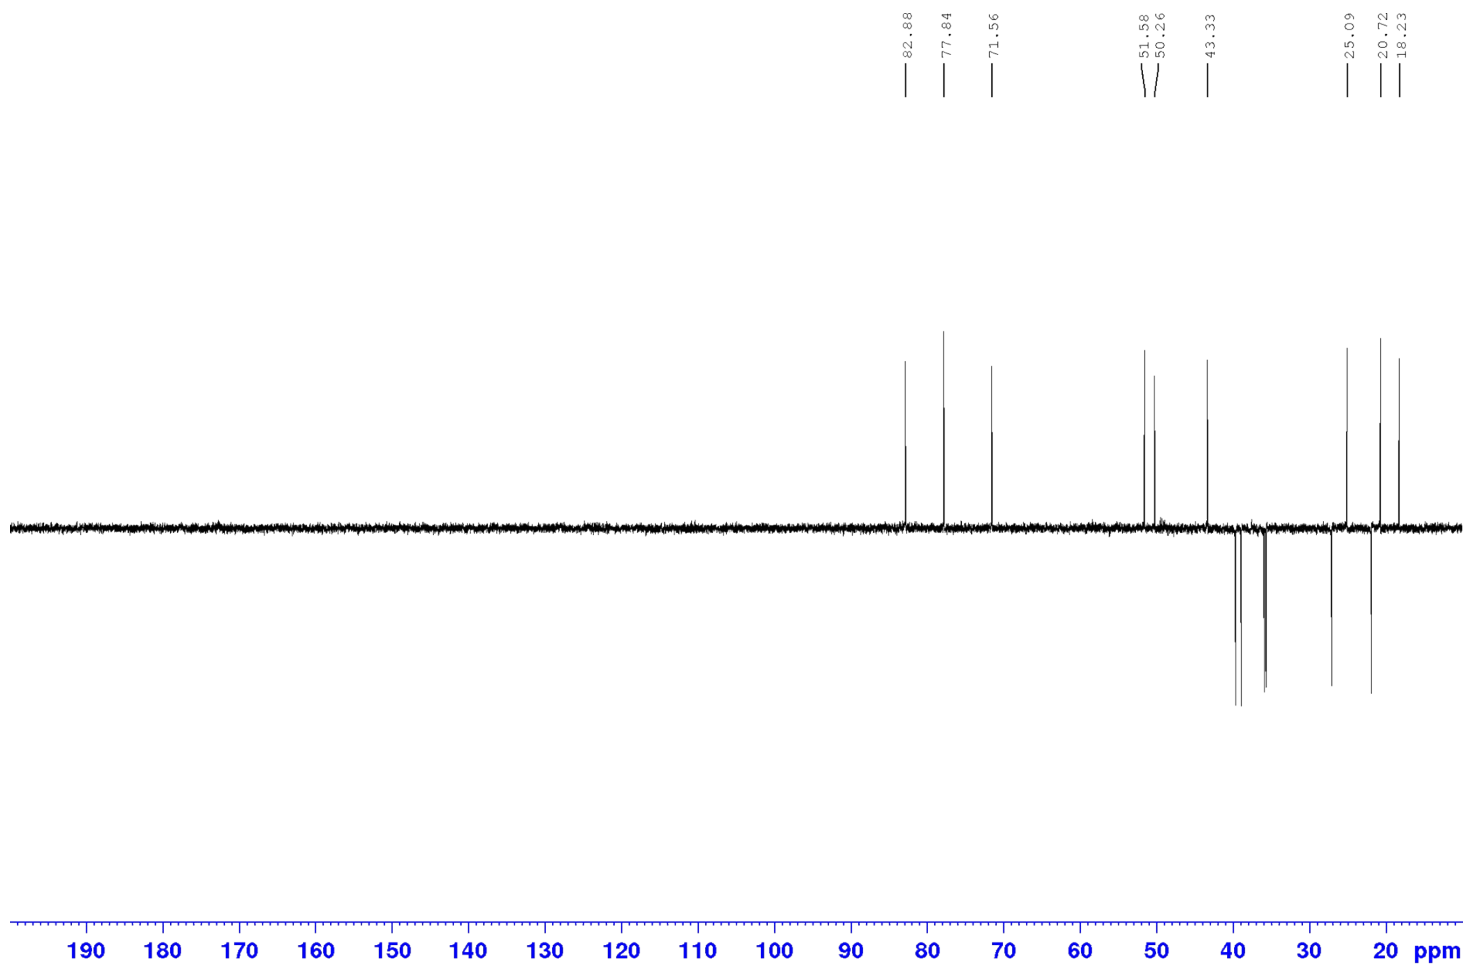

Figure S19. DEPT-135 NMR spectrum of Noueinsiancin B (2) in CD<sub>3</sub>OD

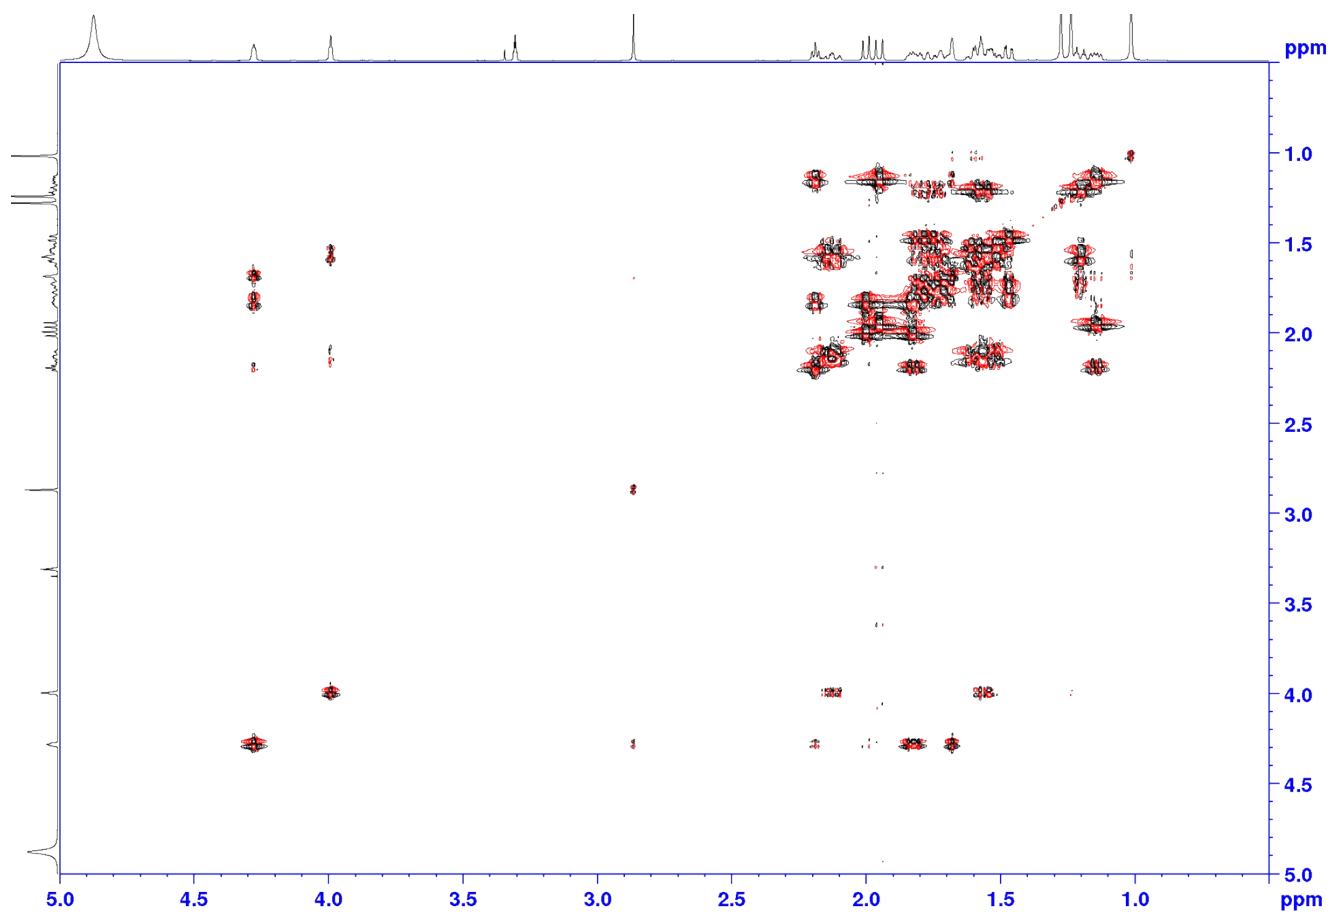

Figure S20.  $^1\text{H}$ - $^1\text{H}$  COSY spectrum of Nouveinsiancin B (2) in  $\text{CD}_3\text{OD}$



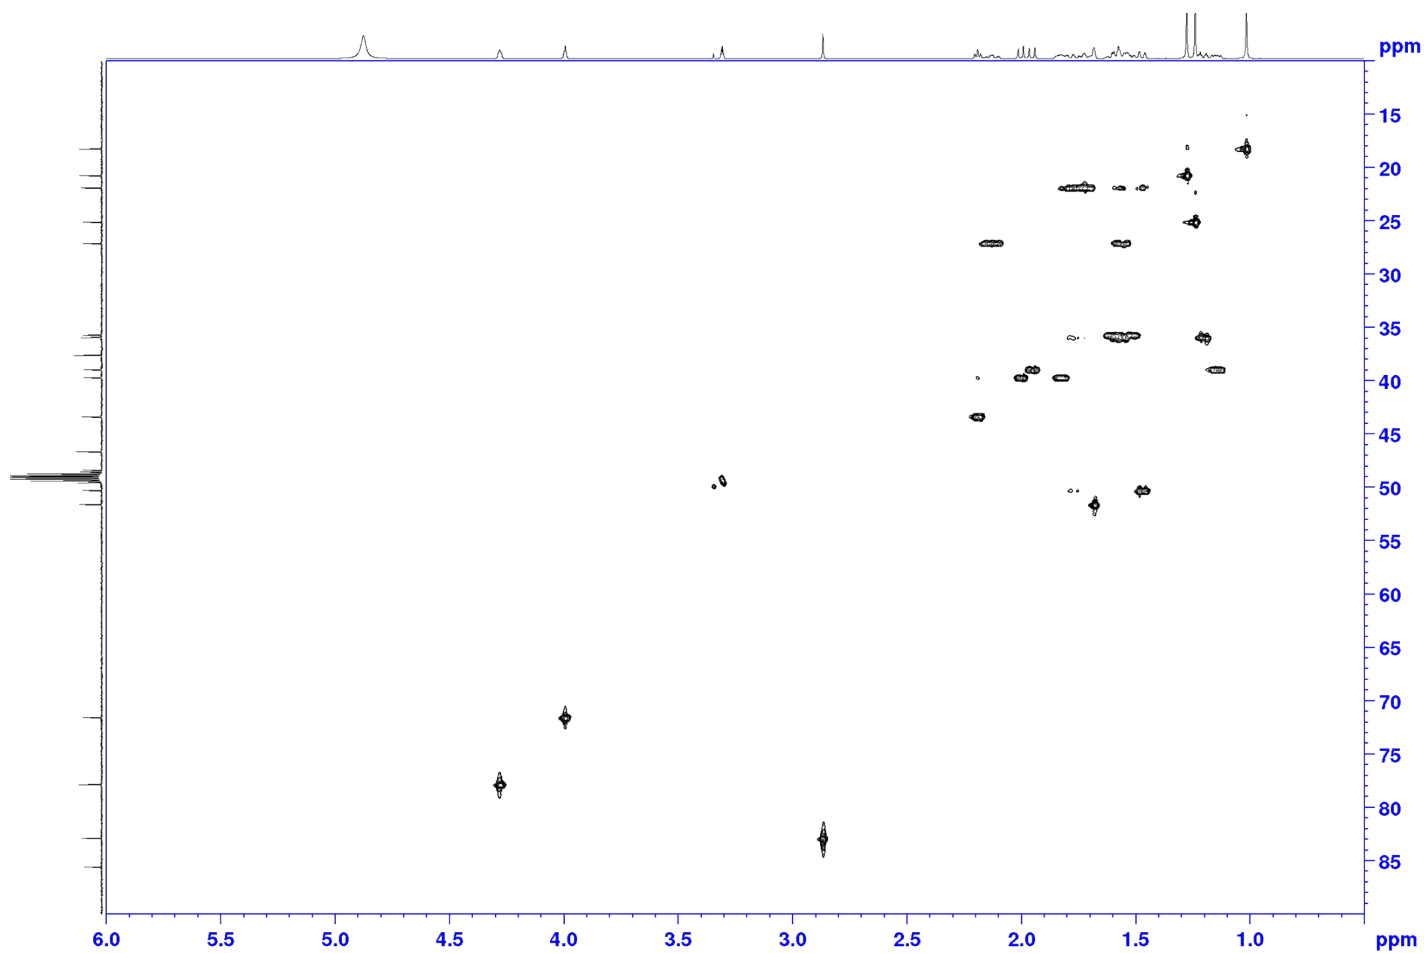

Figure S21. HSQC spectrum of Noueinsiancin B (2) in  $\text{CD}_3\text{OD}$

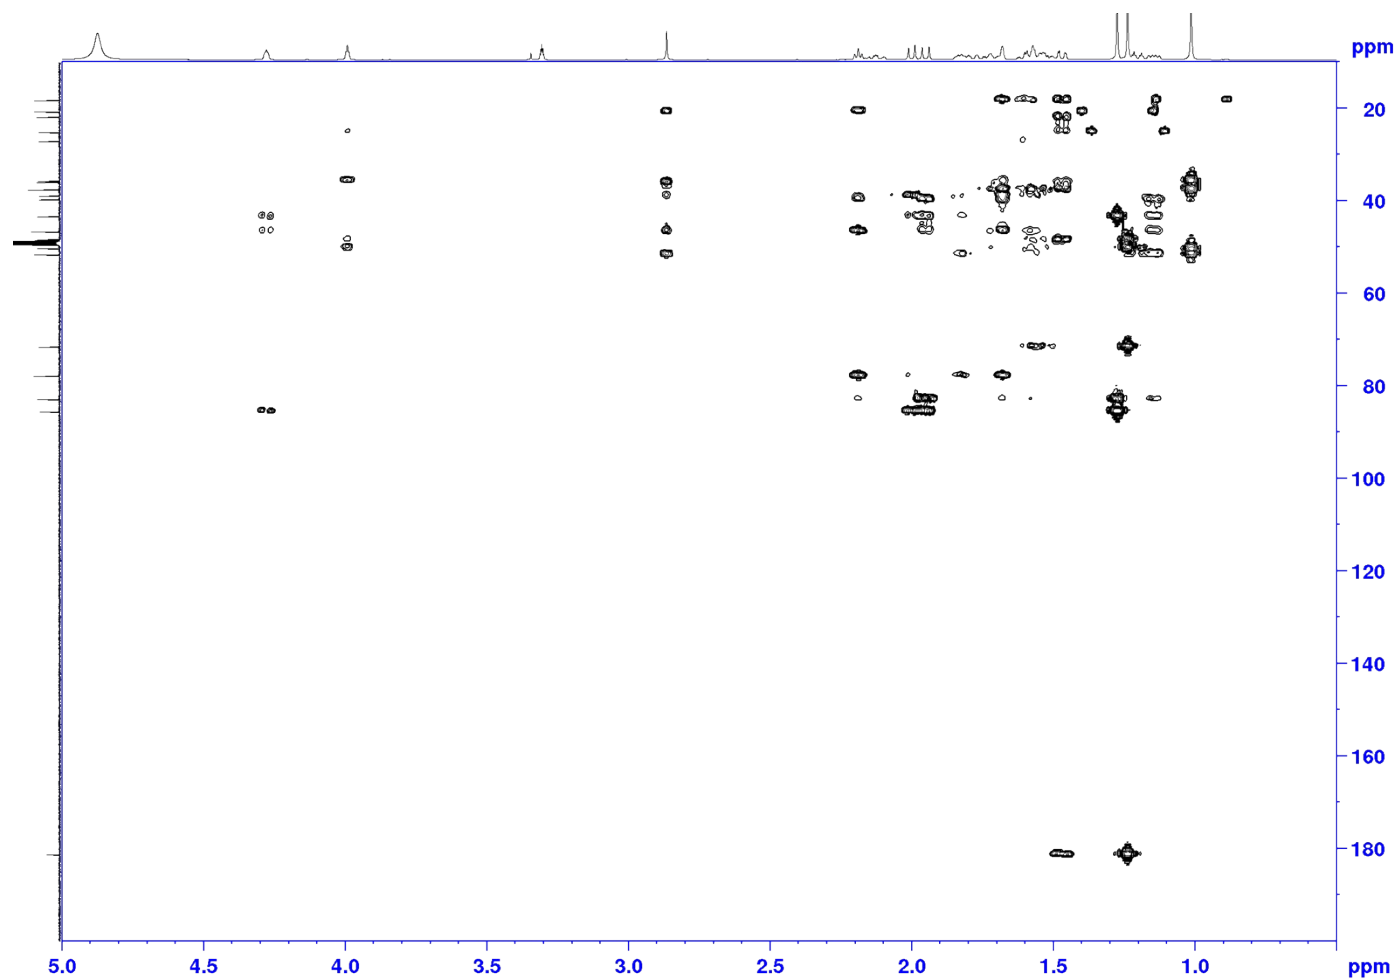

Figure S22. HMBC spectrum of Noueinsiancin B (2) in CD<sub>3</sub>OD

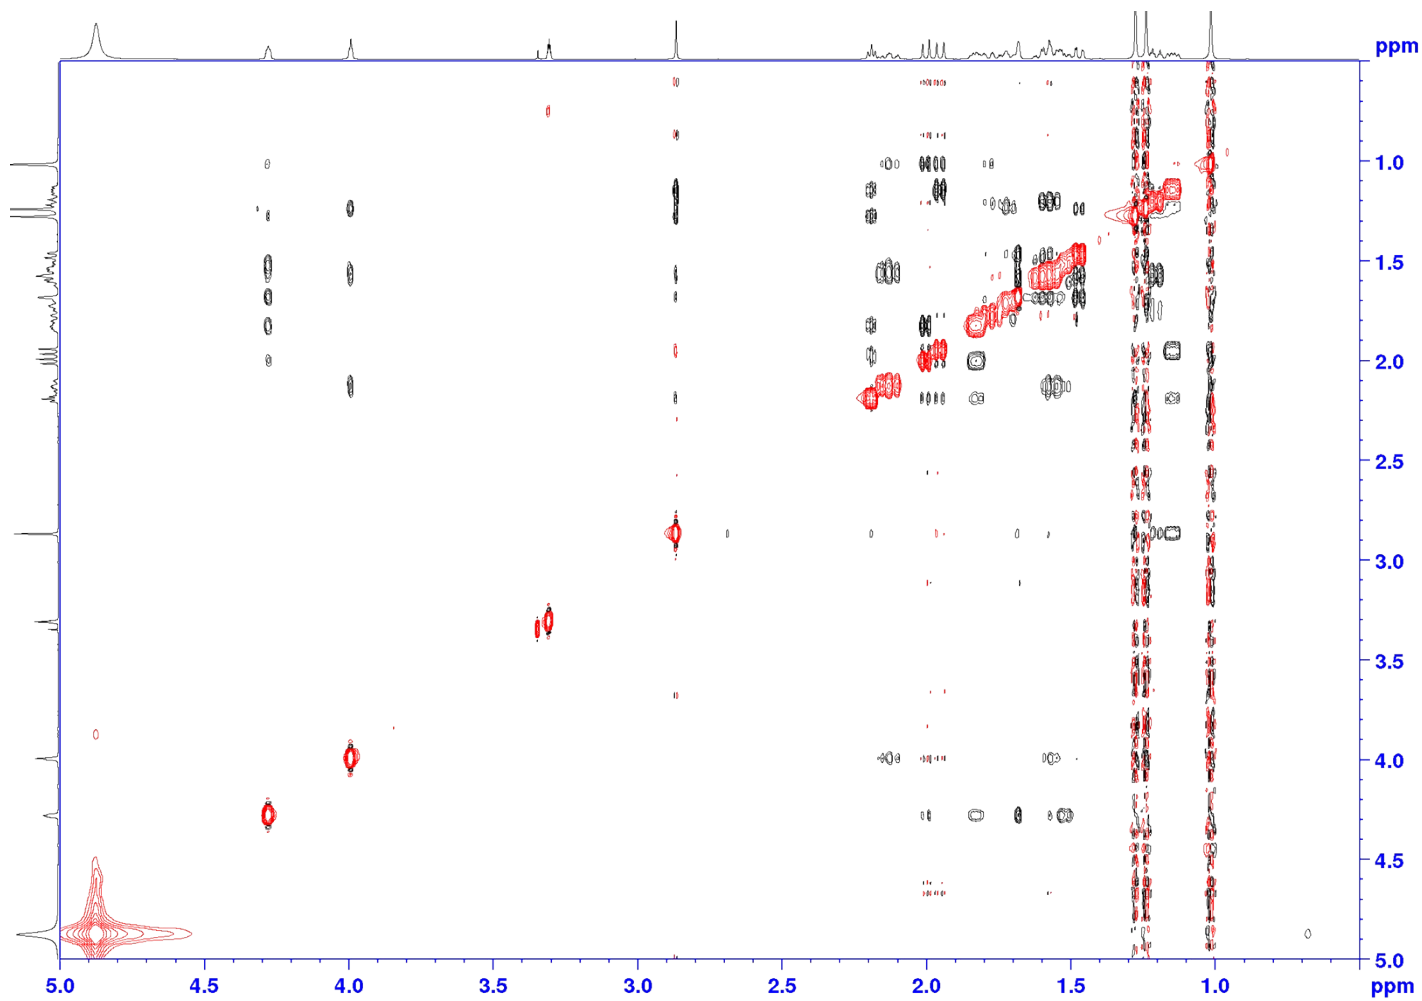

Figure S23. NOESY spectrum of Noueinsiancin B (2) in CD<sub>3</sub>OD

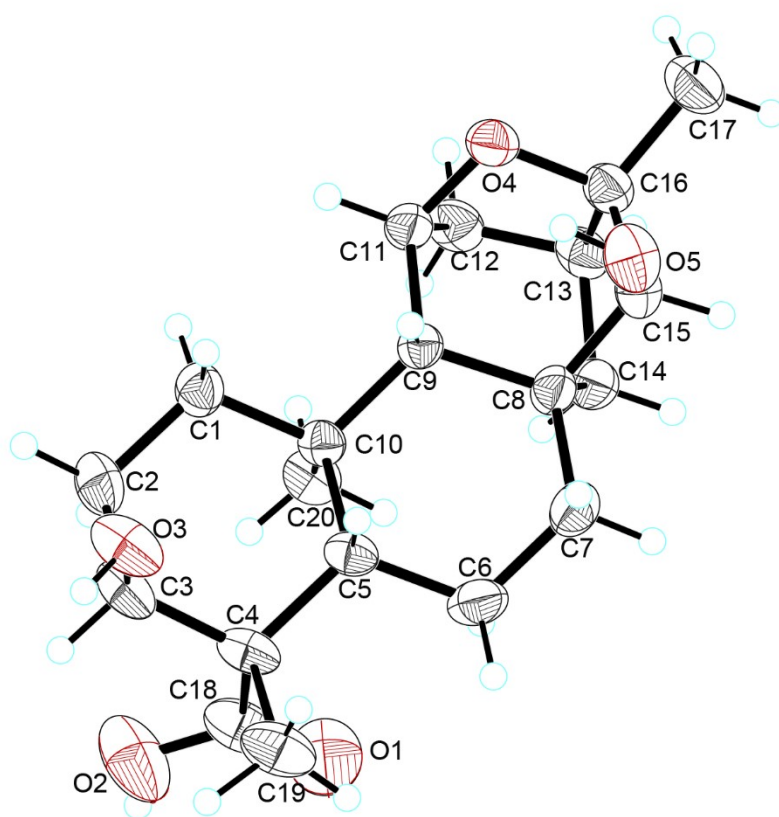

**Figure S24. X-ray structure of Nouveinsiancin B (2)**

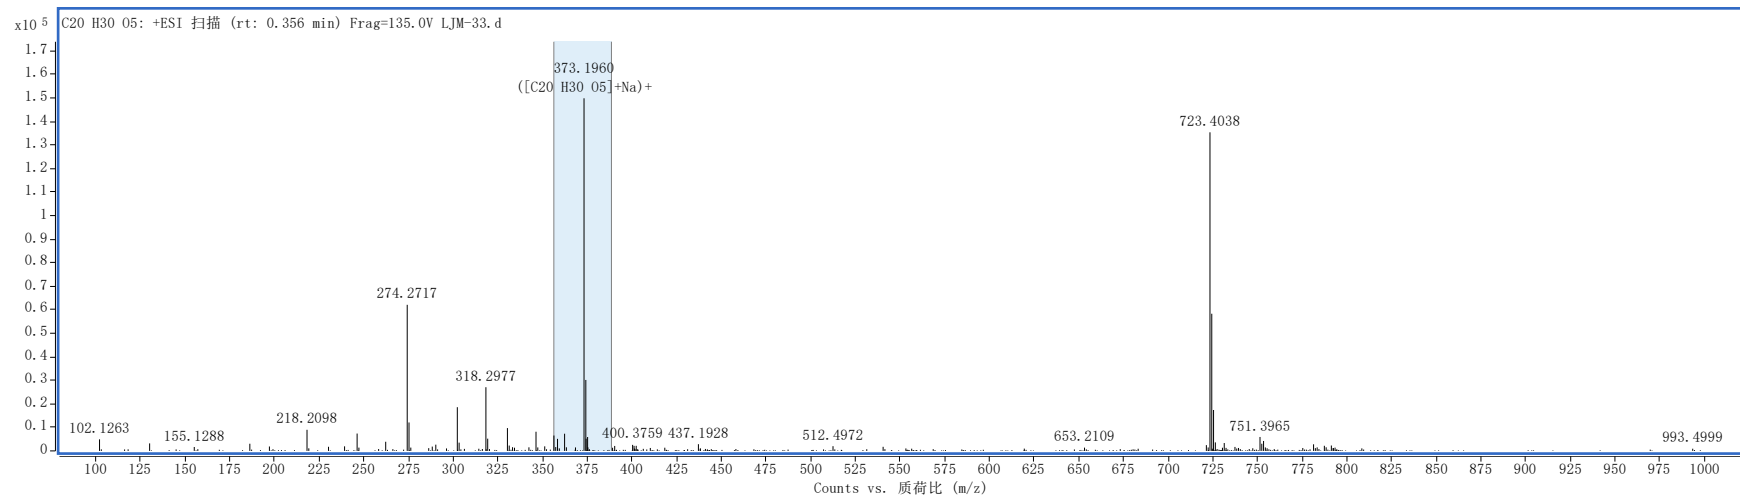

| 最佳   | ID 来源 | 分子式        | 种类      | m/z      | 分数    | Diff (ppm) | 分数 (MFG) |
|------|-------|------------|---------|----------|-------|------------|----------|
| TRUE | MFG   | C20 H30 O5 | (M+Na)+ | 373.1960 | 81.47 | 7.7        | 81.47    |

| 峰高总百分比 (Calc) | 峰高 (计算值) | 峰高百分数(计算值) | m/z (Calc) | Diff (mDa) | 峰高       | 峰高百分数 | 峰高总百分比 | m/z     | Diff (ppm) |
|---------------|----------|------------|------------|------------|----------|-------|--------|---------|------------|
| 79.7          | 148045.5 | 100        | 373.1985   | 2.6        | 149803.4 | 100   | 80.6   | 373.196 | 6.91       |

Figure S25. HRESIMS spectrum of Nouveinsiancin C (3)

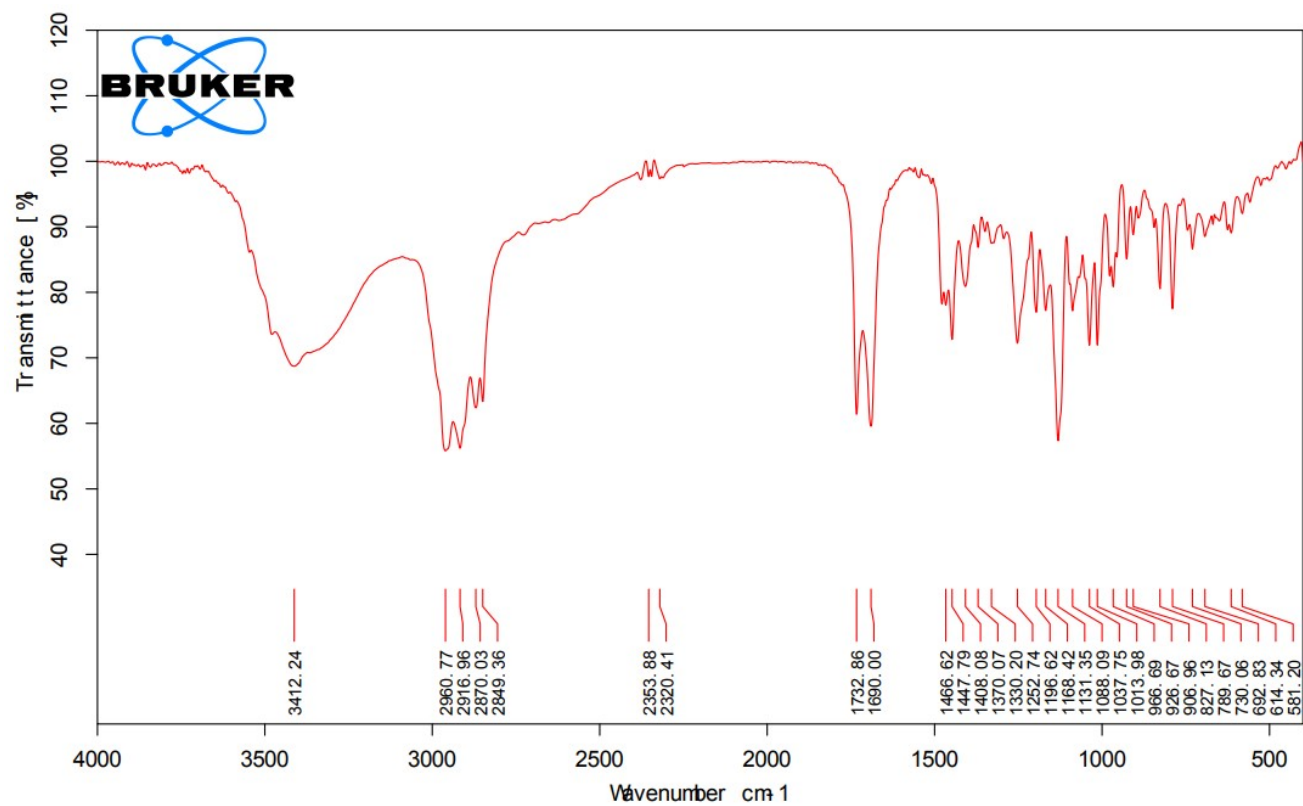

Figure S26. IR spectrum of Noueinsiancin C (3)

**Rudolph Research Analytical**

Wednesday, 02/09/2022

This sample was measured on an Autopol VI, serial number 90079,  
manufactured by Rudolph Research Analytical, Hackettstown, NJ.

LotID : LJM-33  
Set Temperature : 20.0  
Temp Corr : OFF

| <b>n</b> | <b>Average</b> | <b>Std.Dev.</b> | <b>Maximum</b> | <b>Minimum</b> |
|----------|----------------|-----------------|----------------|----------------|
| 6        | -80.256        | 0.5732          | -80.000        | -81.538        |

| <b>S.No</b> | <b>Sample ID</b> | <b>Time</b> | <b>Result</b> | <b>Scale</b> | <b>OR ° Arc</b> | <b>WLG</b> | <b>Lg.mm</b> | <b>Conc.</b> | <b>Temp.</b> | <b>Comment</b> |
|-------------|------------------|-------------|---------------|--------------|-----------------|------------|--------------|--------------|--------------|----------------|
| 1           | LJM-33           | 03:53:04 PM | -81.538       | SR           | -0.053          | 589        | 100.00       | 0.065        | 20.2         |                |
| 2           | LJM-33           | 03:53:10 PM | -80.000       | SR           | -0.052          | 589        | 100.00       | 0.065        | 20.2         |                |
| 3           | LJM-33           | 03:53:16 PM | -80.000       | SR           | -0.052          | 589        | 100.00       | 0.065        | 20.1         |                |
| 4           | LJM-33           | 03:53:22 PM | -80.000       | SR           | -0.052          | 589        | 100.00       | 0.065        | 20.1         |                |
| 5           | LJM-33           | 03:53:27 PM | -80.000       | SR           | -0.052          | 589        | 100.00       | 0.065        | 20.1         |                |
| 6           | LJM-33           | 03:53:33 PM | -80.000       | SR           | -0.052          | 589        | 100.00       | 0.065        | 20.1         |                |

\_\_\_\_\_  
Signature

**Figur**

**e S27. OR Value of Noueinsiancin C (3) in CH<sub>3</sub>OH**

Property : Circular Dichroism

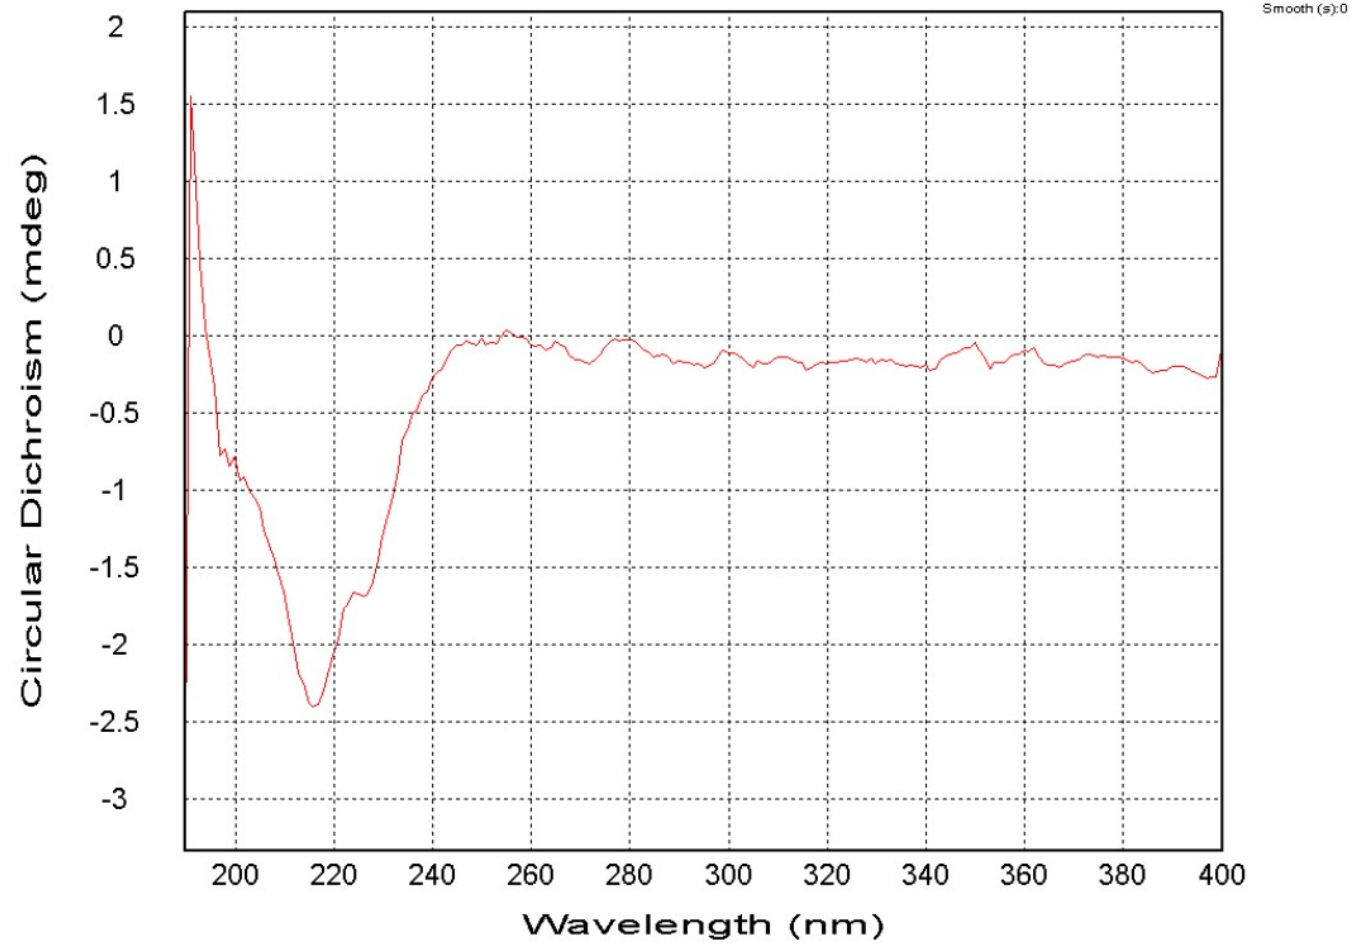

Figure S28. CD Value of Noueinsiancin C (3) in CH<sub>3</sub>OH



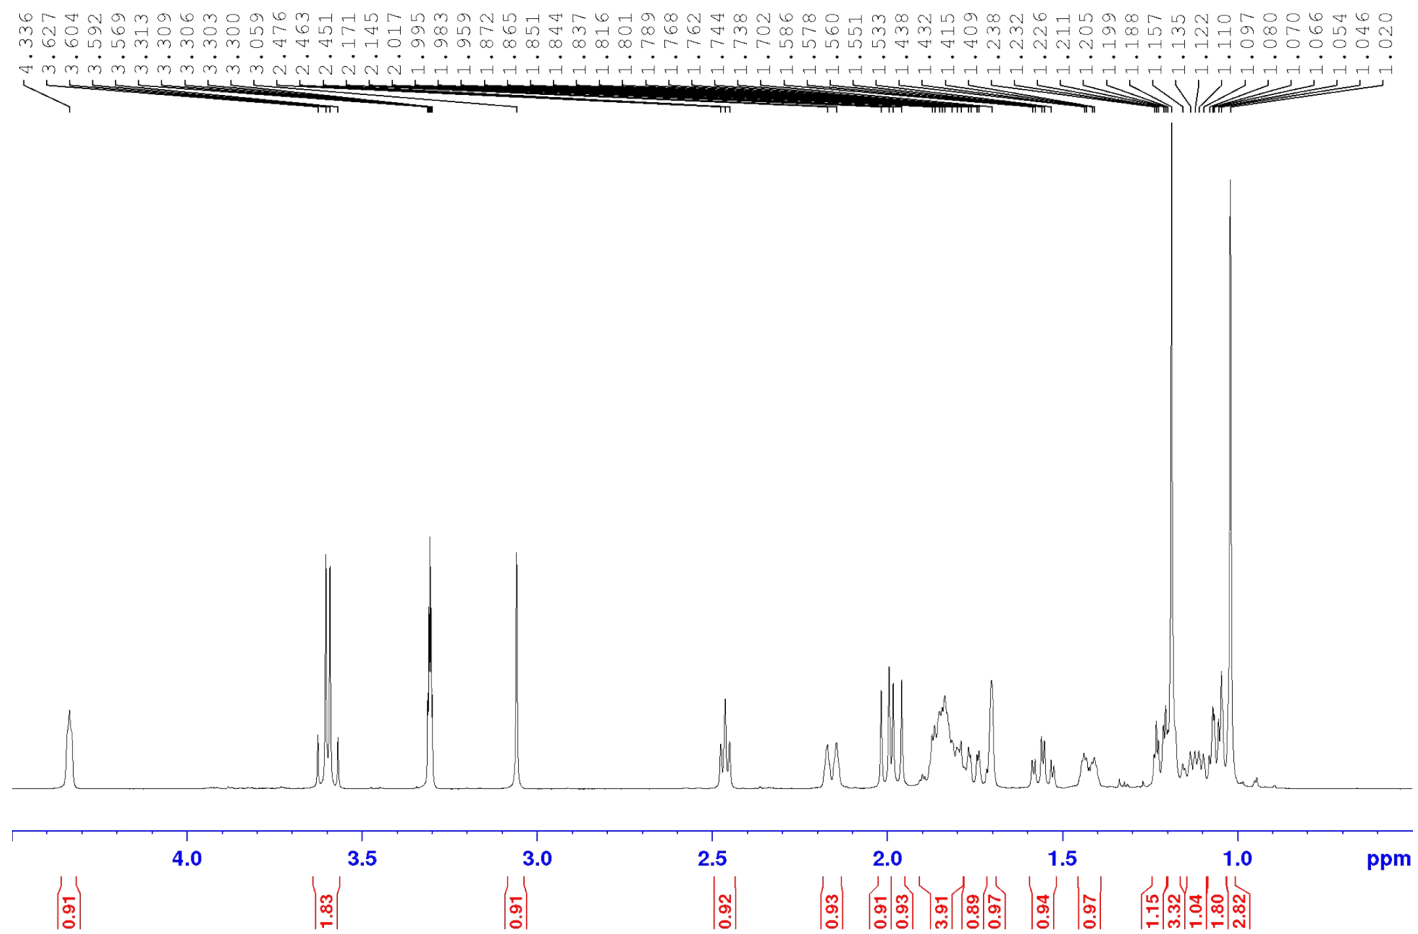

Figure S29. <sup>1</sup>H NMR spectrum of Noueinsiancin C (3) in CD<sub>3</sub>OD

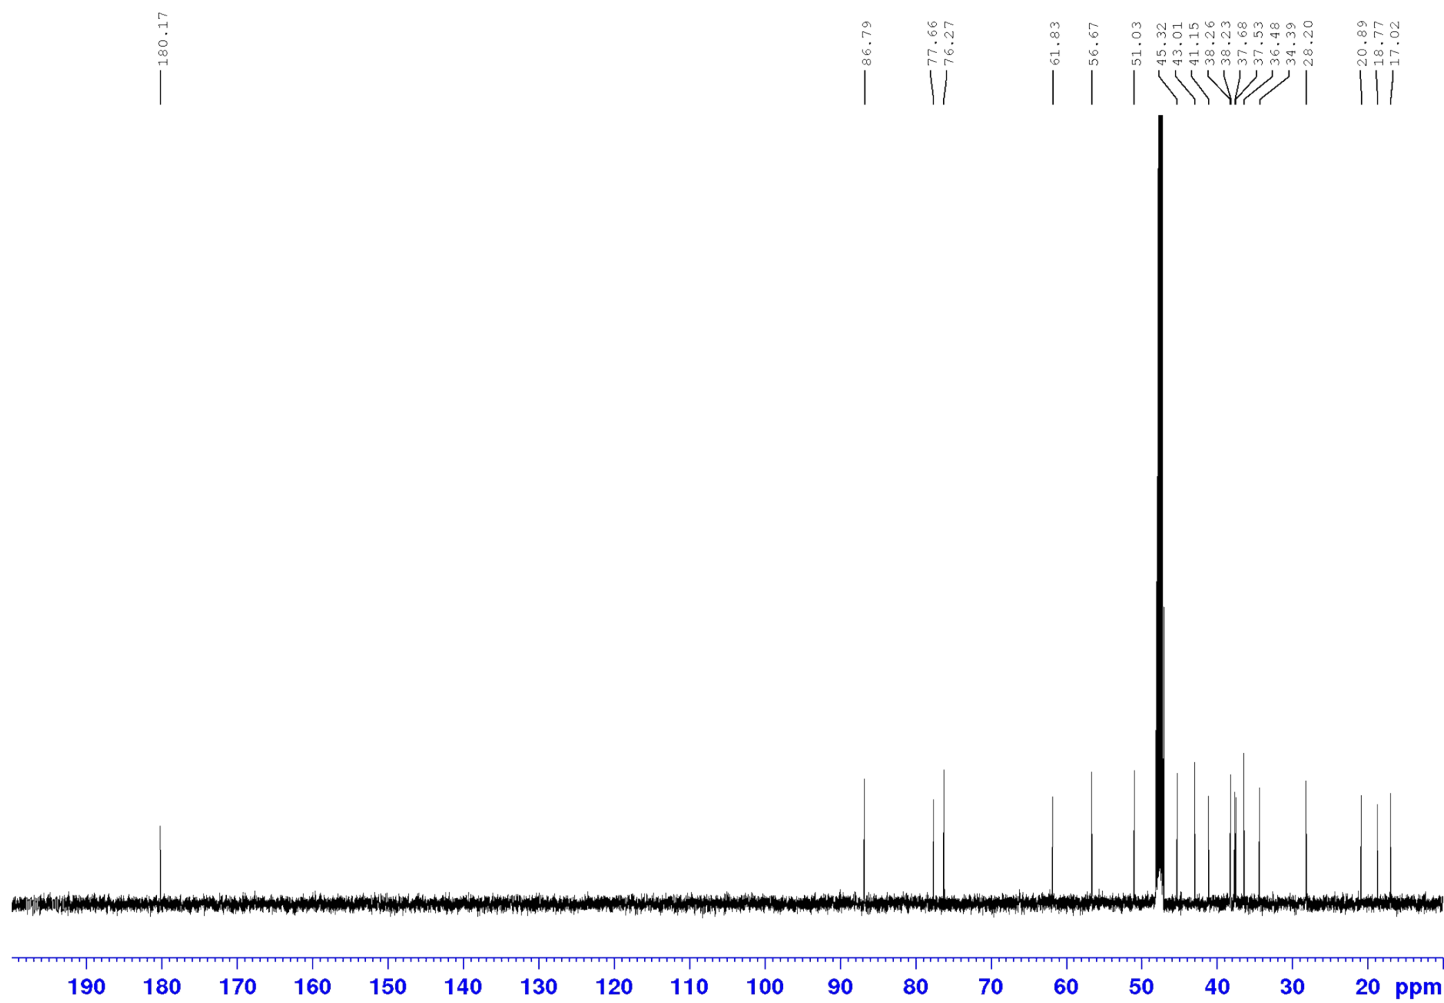

Figure S30. <sup>13</sup>C NMR spectrum of Noueinsiancin C (3) in CD<sub>3</sub>OD

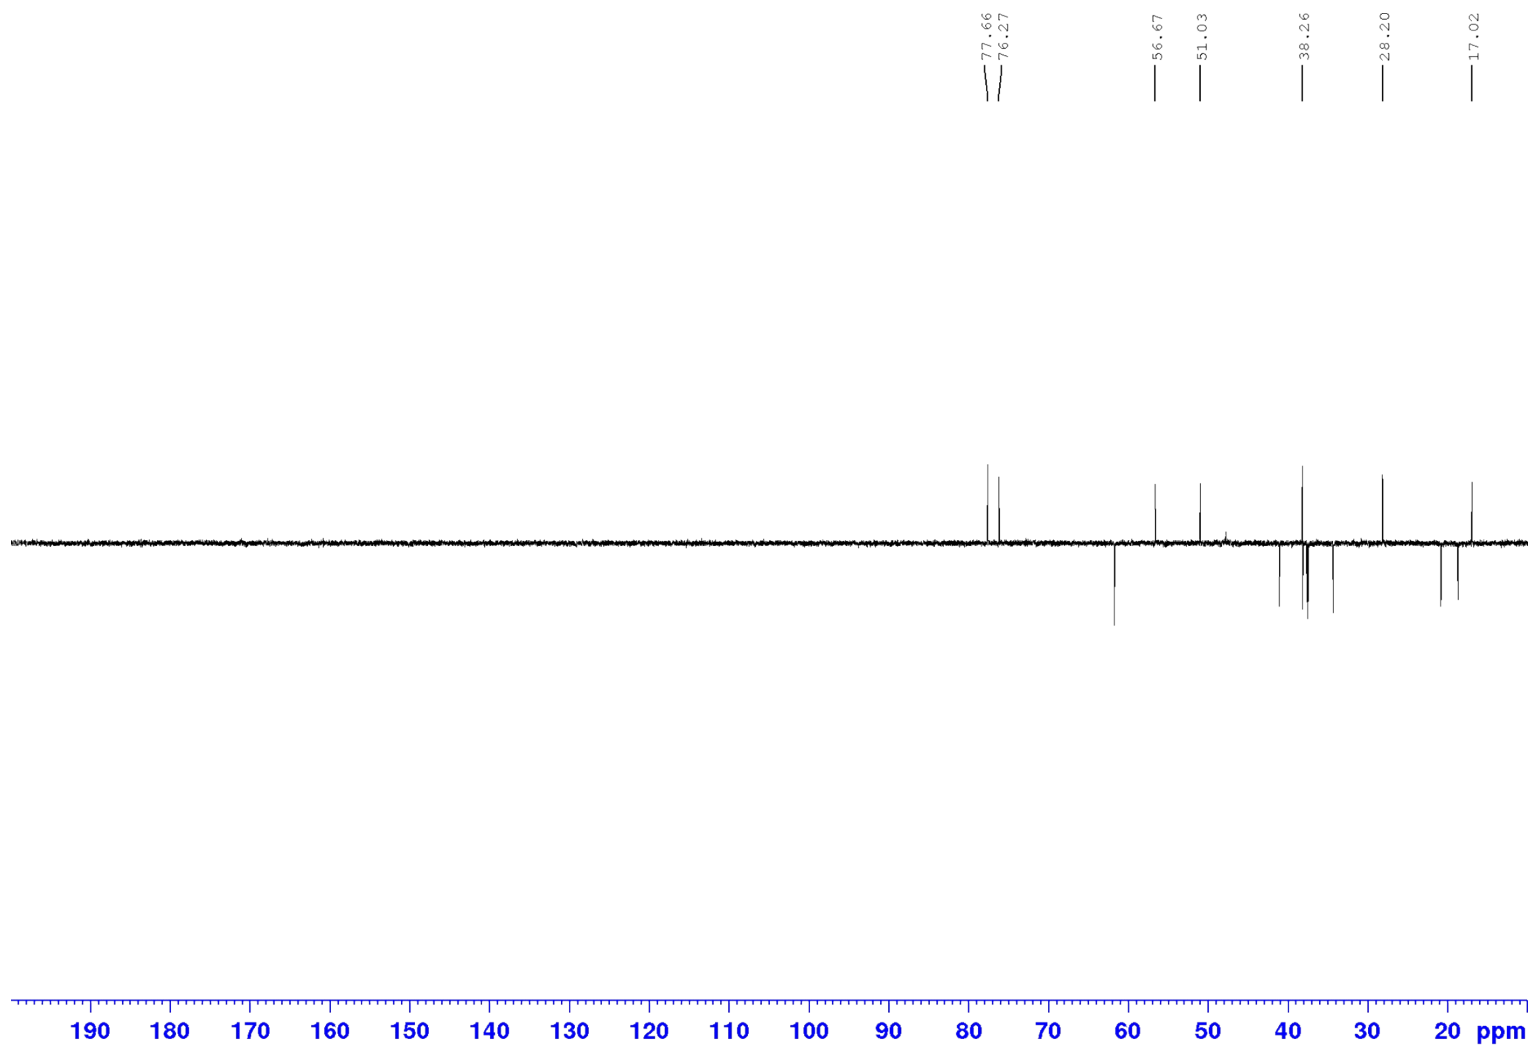

Figure S31. DEPT-135 NMR spectrum of Noueinsiancin C (3) in CD<sub>3</sub>OD

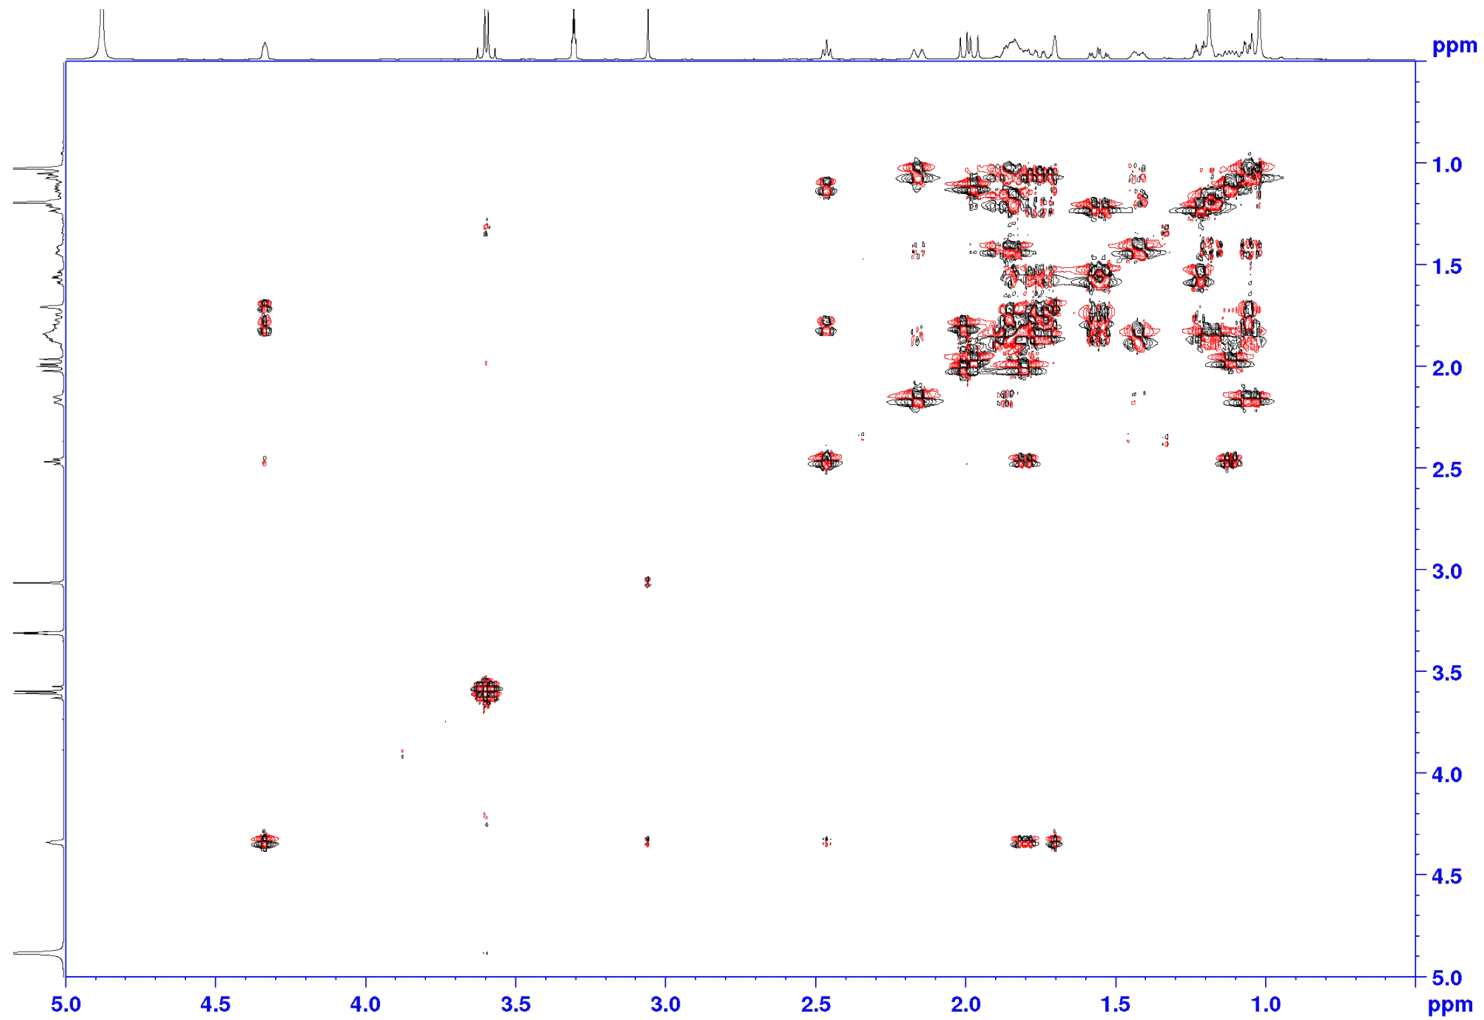

Figure S32.  $^1\text{H}$ - $^1\text{H}$  COSY spectrum of Noueinsiancin C (3) in  $\text{CD}_3\text{OD}$

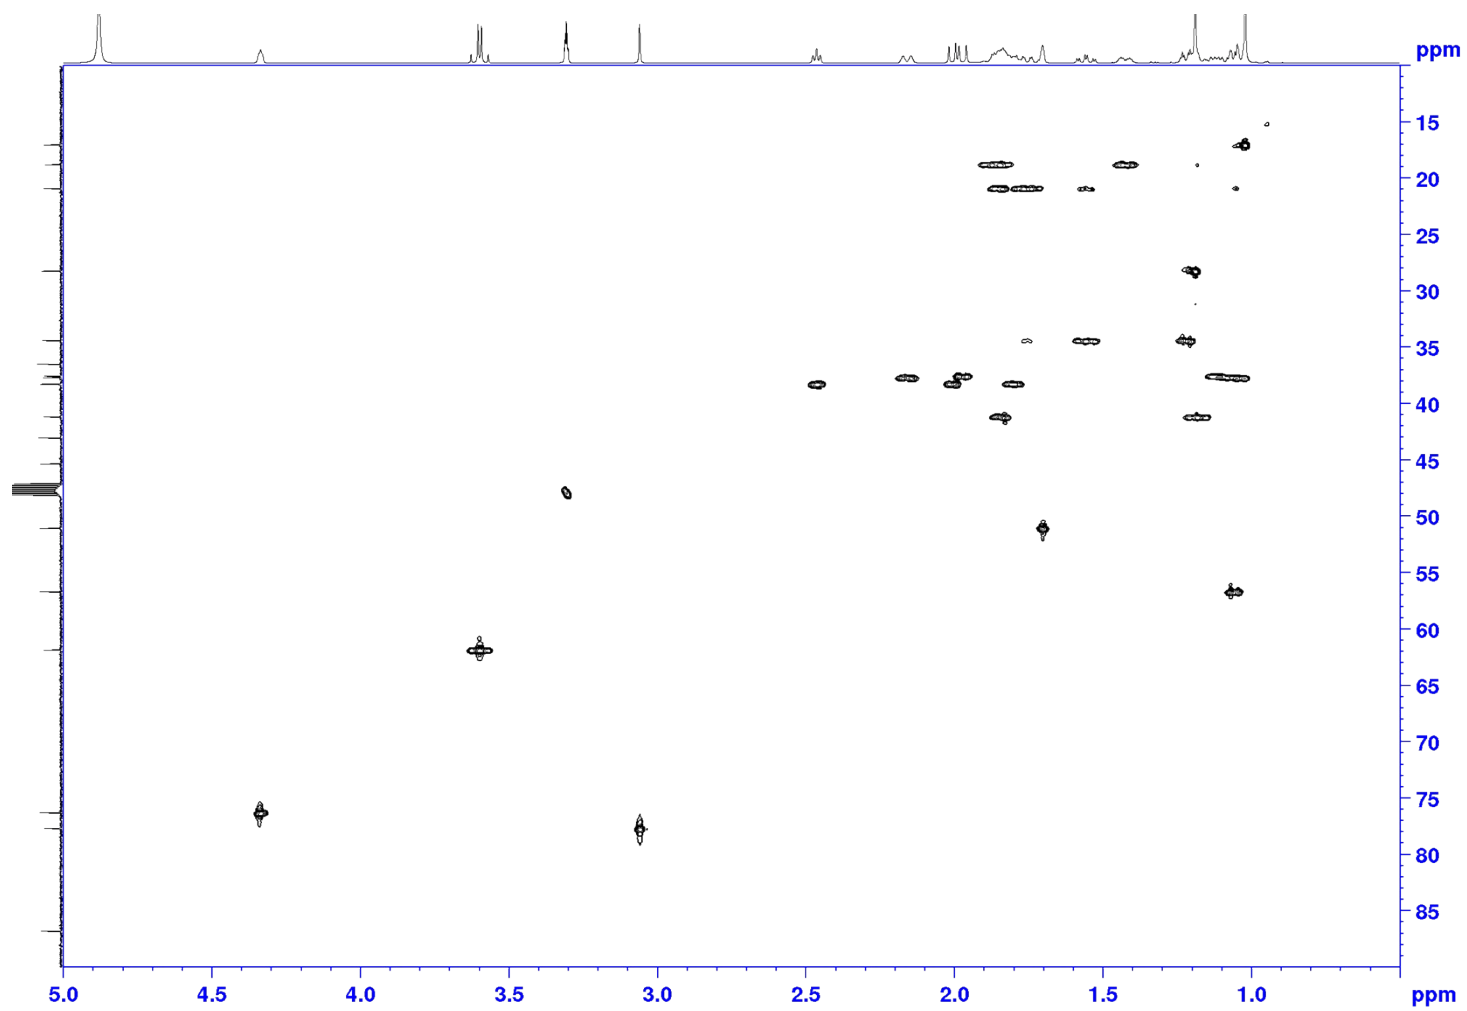

Figure S33. HSQC spectrum of Noueinsiancin C (3) in CD<sub>3</sub>OD

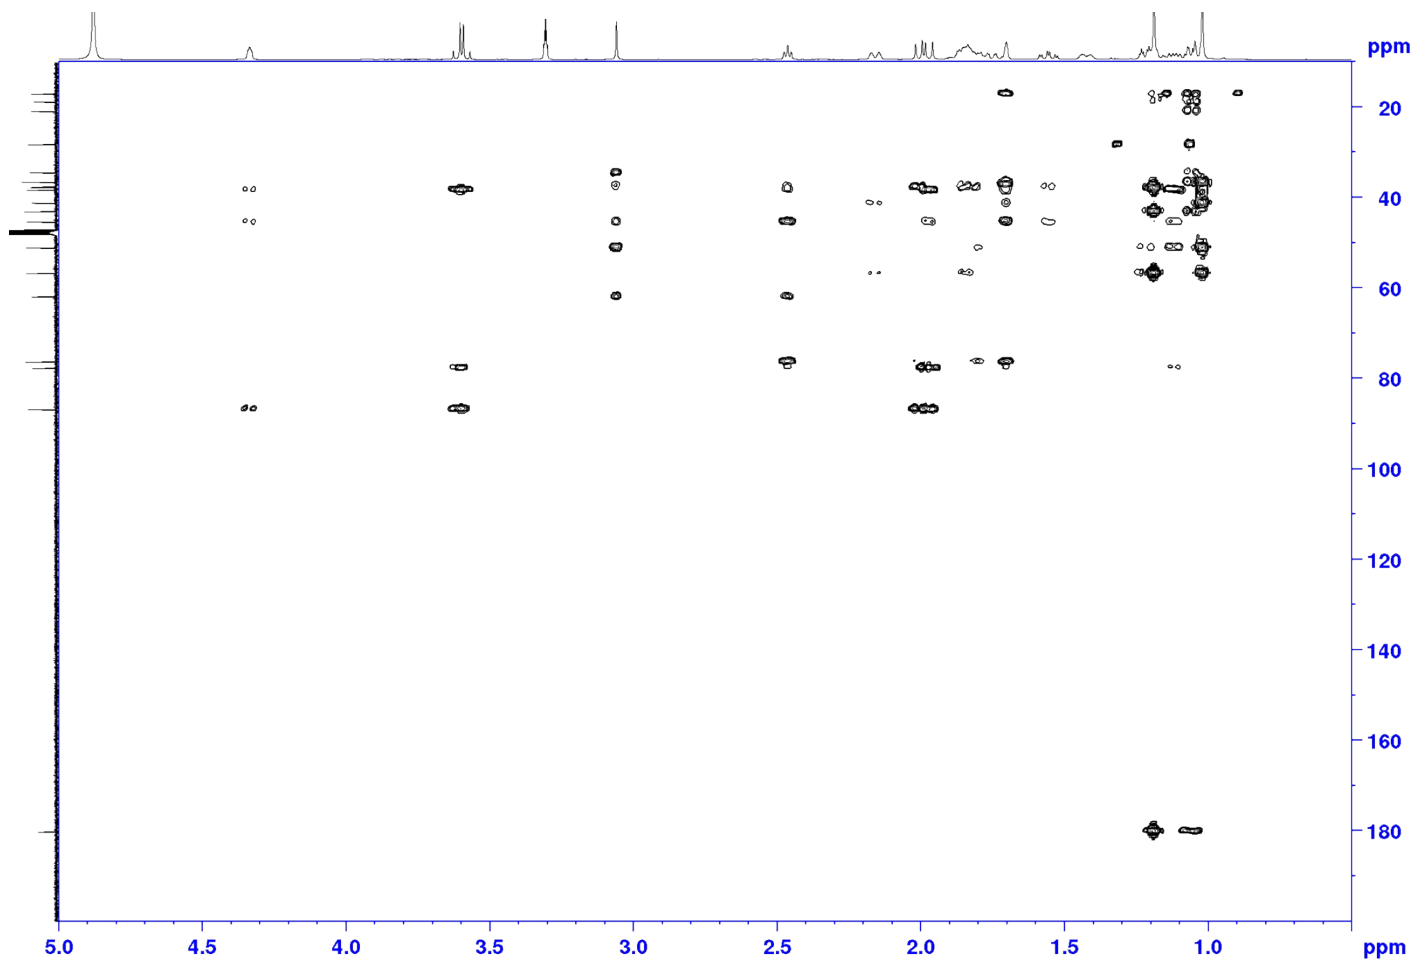

Figure S34. HMBC spectrum of Noueinsiancin C (3) in CD<sub>3</sub>OD

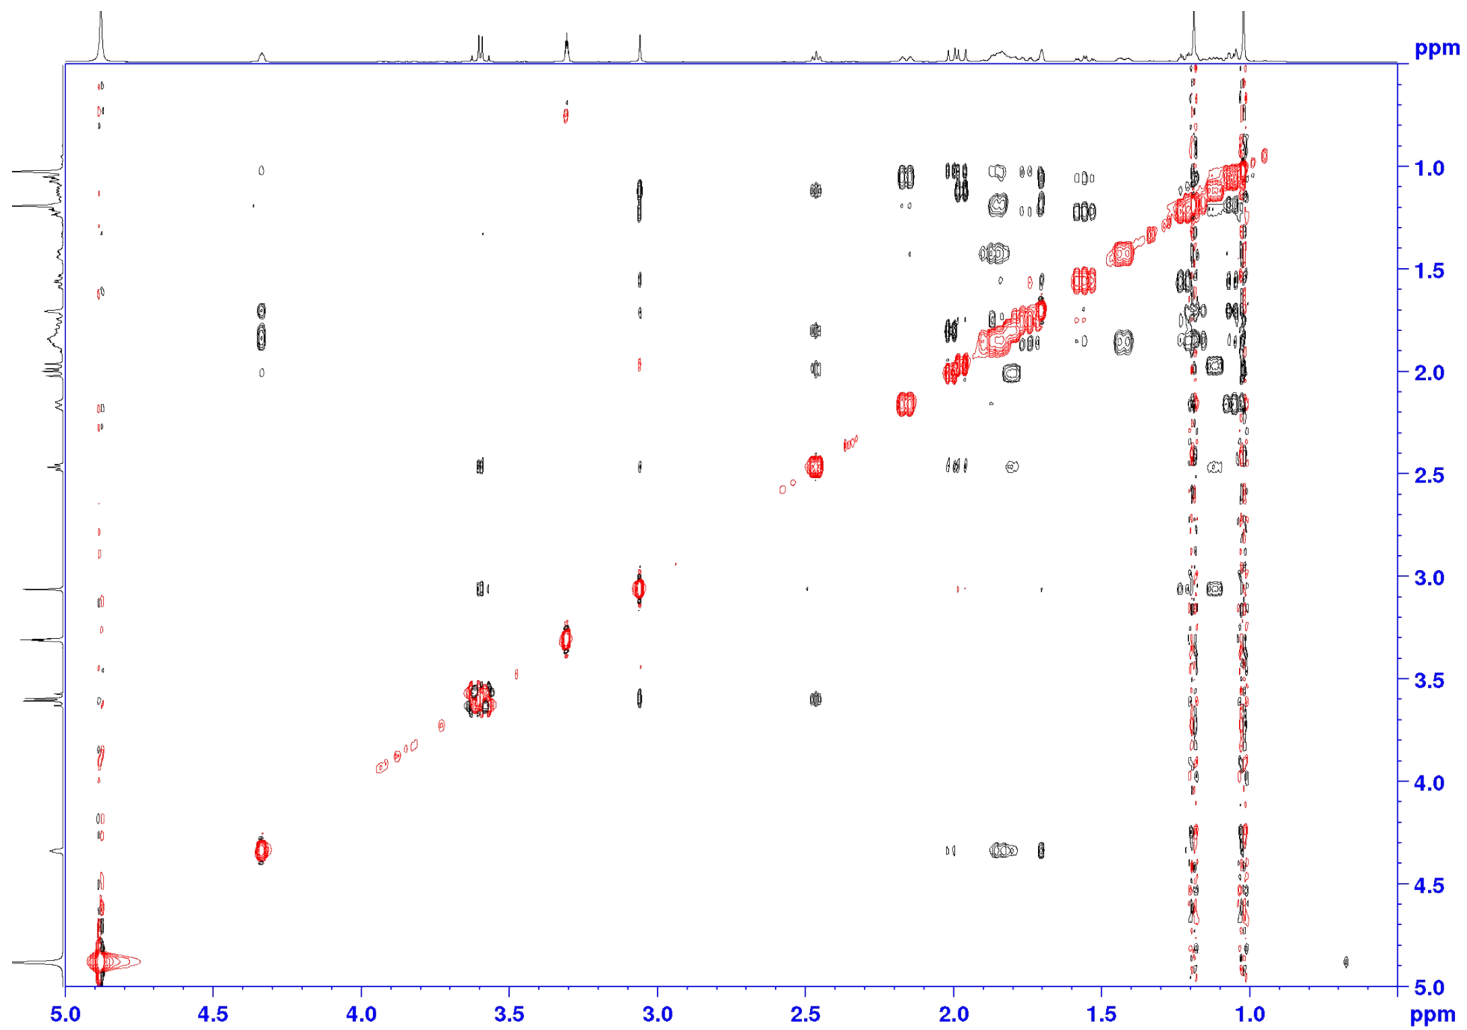

Figure S35. NOESY spectrum of Noueinsiancin C (3) in CD<sub>3</sub>OD

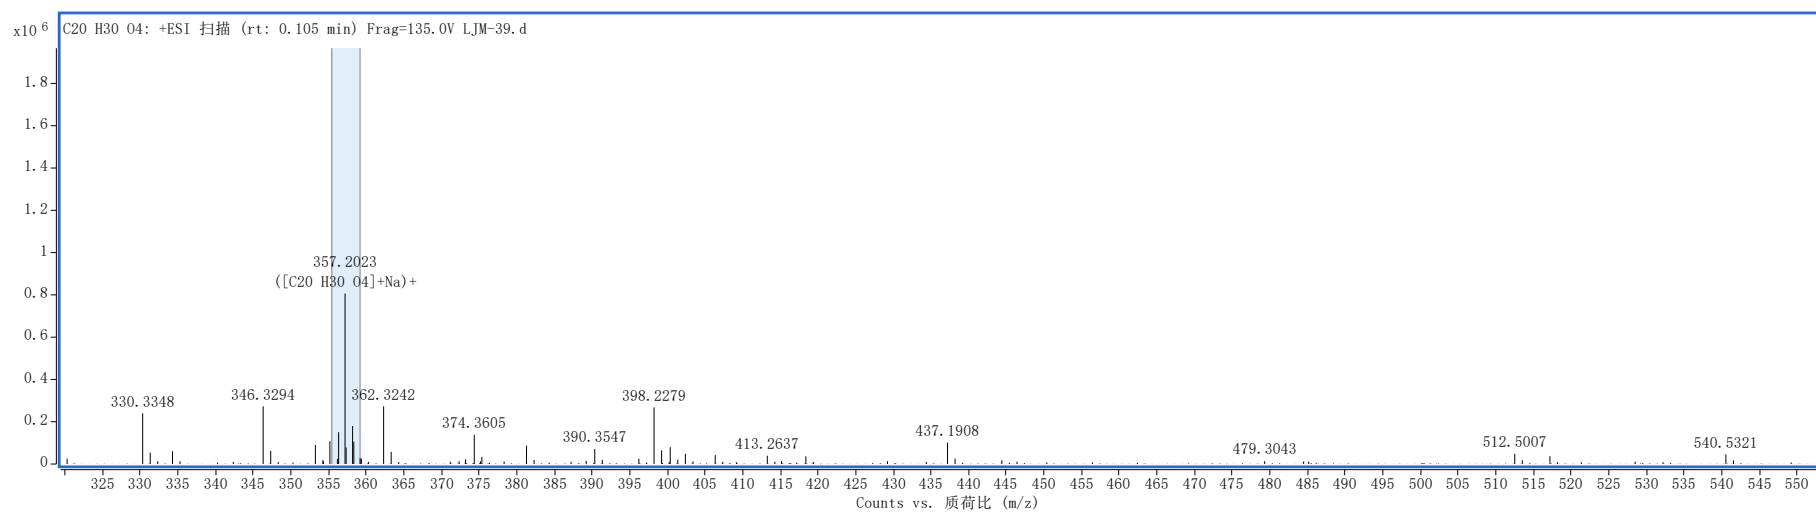

| 最佳   | ID 来源 | 分子式        | 种类      | m/z      | 分数    | Diff (ppm) | 分数 (谱库) | 分数 (DB) | 分数 (MFG) |
|------|-------|------------|---------|----------|-------|------------|---------|---------|----------|
| TRUE | MFG   | C20 H30 O4 | (M+Na)+ | 357.2023 | 92.42 | 4.59       |         |         | 92.42    |

| 峰高总百分比 (Calc) | 峰高 (计算值) | 峰高百分数(计算值) | m/z (Calc) | Diff (mDa) | 峰高       | 峰高百分数 | 峰高总百分比 | m/z      | Diff (ppm) |
|---------------|----------|------------|------------|------------|----------|-------|--------|----------|------------|
| 79.8          | 809437.4 | 100        | 357.2036   | 1.3        | 807306.1 | 100   | 79.6   | 357.2023 | 3.75       |
| 17.7          | 179119.3 | 22.1       | 358.207    | 2.1        | 179631.9 | 22.3  | 17.7   | 358.2049 | 5.92       |

Figure S36. HRESIMS spectrum of Noueinsiancin D (4)



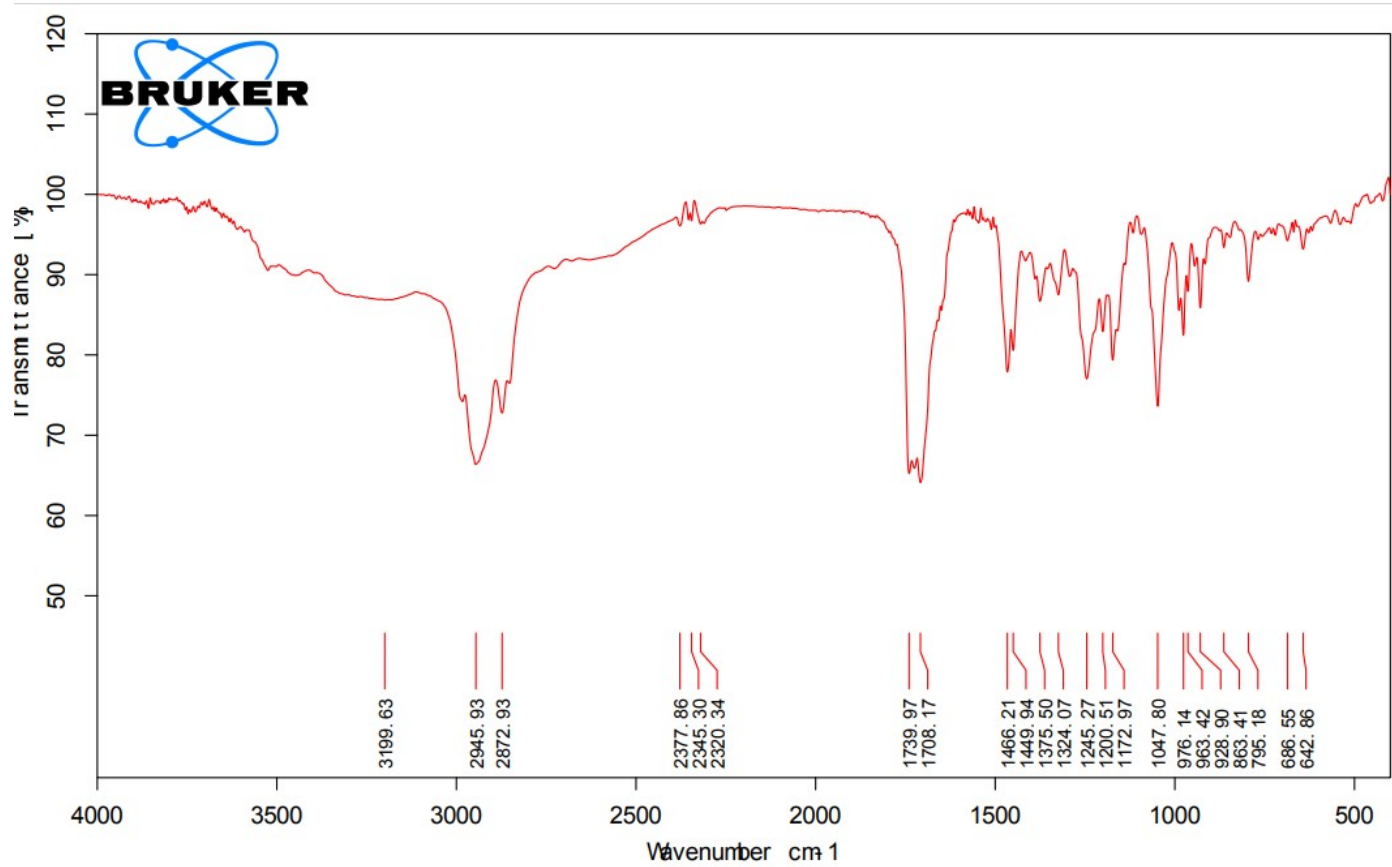

Figure S37. IR spectrum of Nouveinsiancin D (4)

**Rudolph Research Analytical**

Wednesday, 02/09/2022

This sample was measured on an Autopol VI, serial number 90079, manufactured by Rudolph Research Analytical, Hackettstown, NJ.

LotID : LJM-39  
Set Temperature : 20.0  
Temp Corr : OFF

| <b>n</b>    | <b>Average</b>   | <b>Std.Dev.</b> | <b>Maximum</b> | <b>Minimum</b> |                 |            |              |              |              |                |
|-------------|------------------|-----------------|----------------|----------------|-----------------|------------|--------------|--------------|--------------|----------------|
| 6           | -108.333         | 0.0000          | -108.333       | -108.333       |                 |            |              |              |              |                |
| <b>S.No</b> | <b>Sample ID</b> | <b>Time</b>     | <b>Result</b>  | <b>Scale</b>   | <b>OR ° Arc</b> | <b>WLG</b> | <b>Lg.mm</b> | <b>Conc.</b> | <b>Temp.</b> | <b>Comment</b> |
| 1           | LJM-39           | 04:04:41 PM     | -108.333       | SR             | -0.065          | 589        | 100.00       | 0.060        | 19.7         |                |
| 2           | LJM-39           | 04:04:47 PM     | -108.333       | SR             | -0.065          | 589        | 100.00       | 0.060        | 19.7         |                |
| 3           | LJM-39           | 04:04:53 PM     | -108.333       | SR             | -0.065          | 589        | 100.00       | 0.060        | 19.7         |                |
| 4           | LJM-39           | 04:04:58 PM     | -108.333       | SR             | -0.065          | 589        | 100.00       | 0.060        | 19.7         |                |
| 5           | LJM-39           | 04:05:04 PM     | -108.333       | SR             | -0.065          | 589        | 100.00       | 0.060        | 19.8         |                |
| 6           | LJM-39           | 04:05:10 PM     | -108.333       | SR             | -0.065          | 589        | 100.00       | 0.060        | 19.8         |                |

\_\_\_\_\_  
Signature

**Figure S38. OR Value of Noueinsiancin D (4) in CH<sub>3</sub>OH**

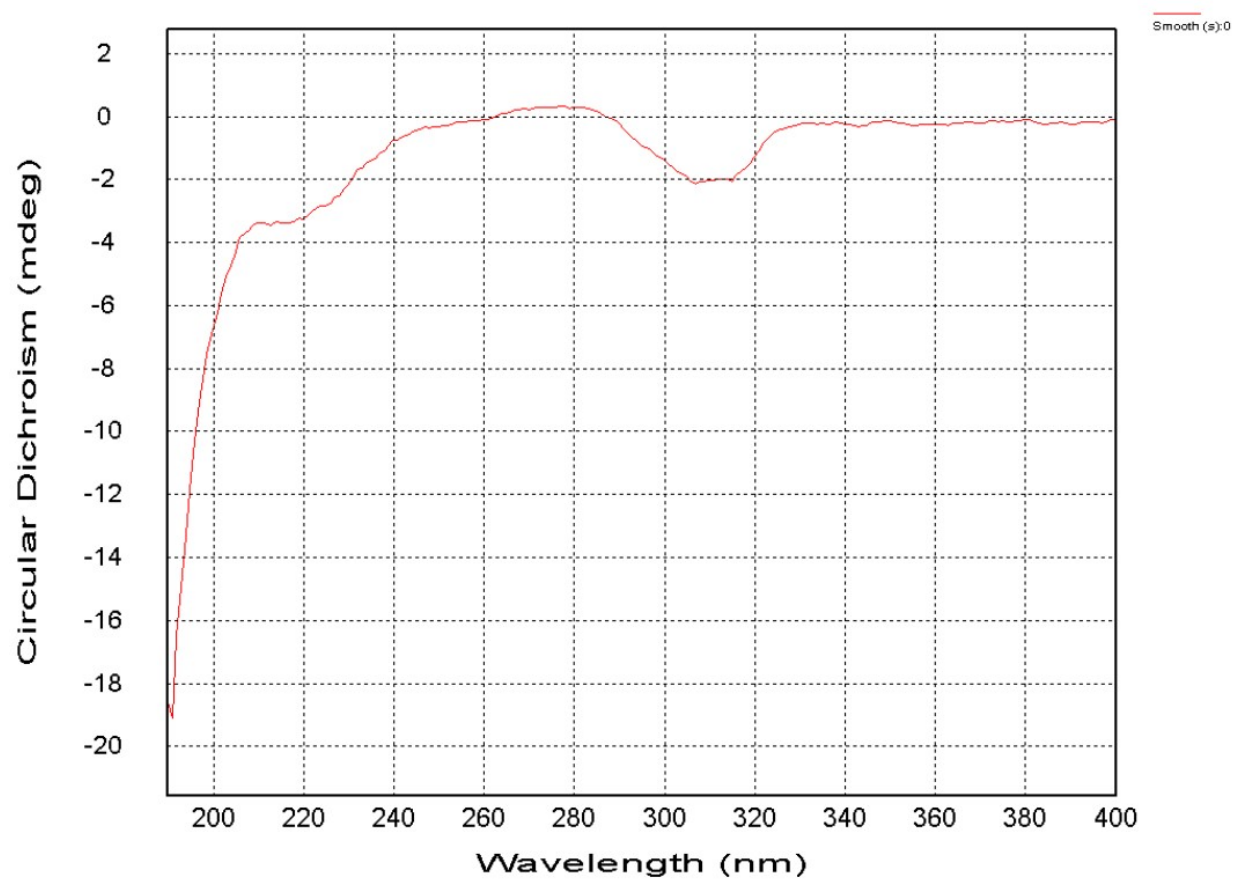

Figure S39. CD Value of Noueinsiancin D (4) in CH<sub>3</sub>OH

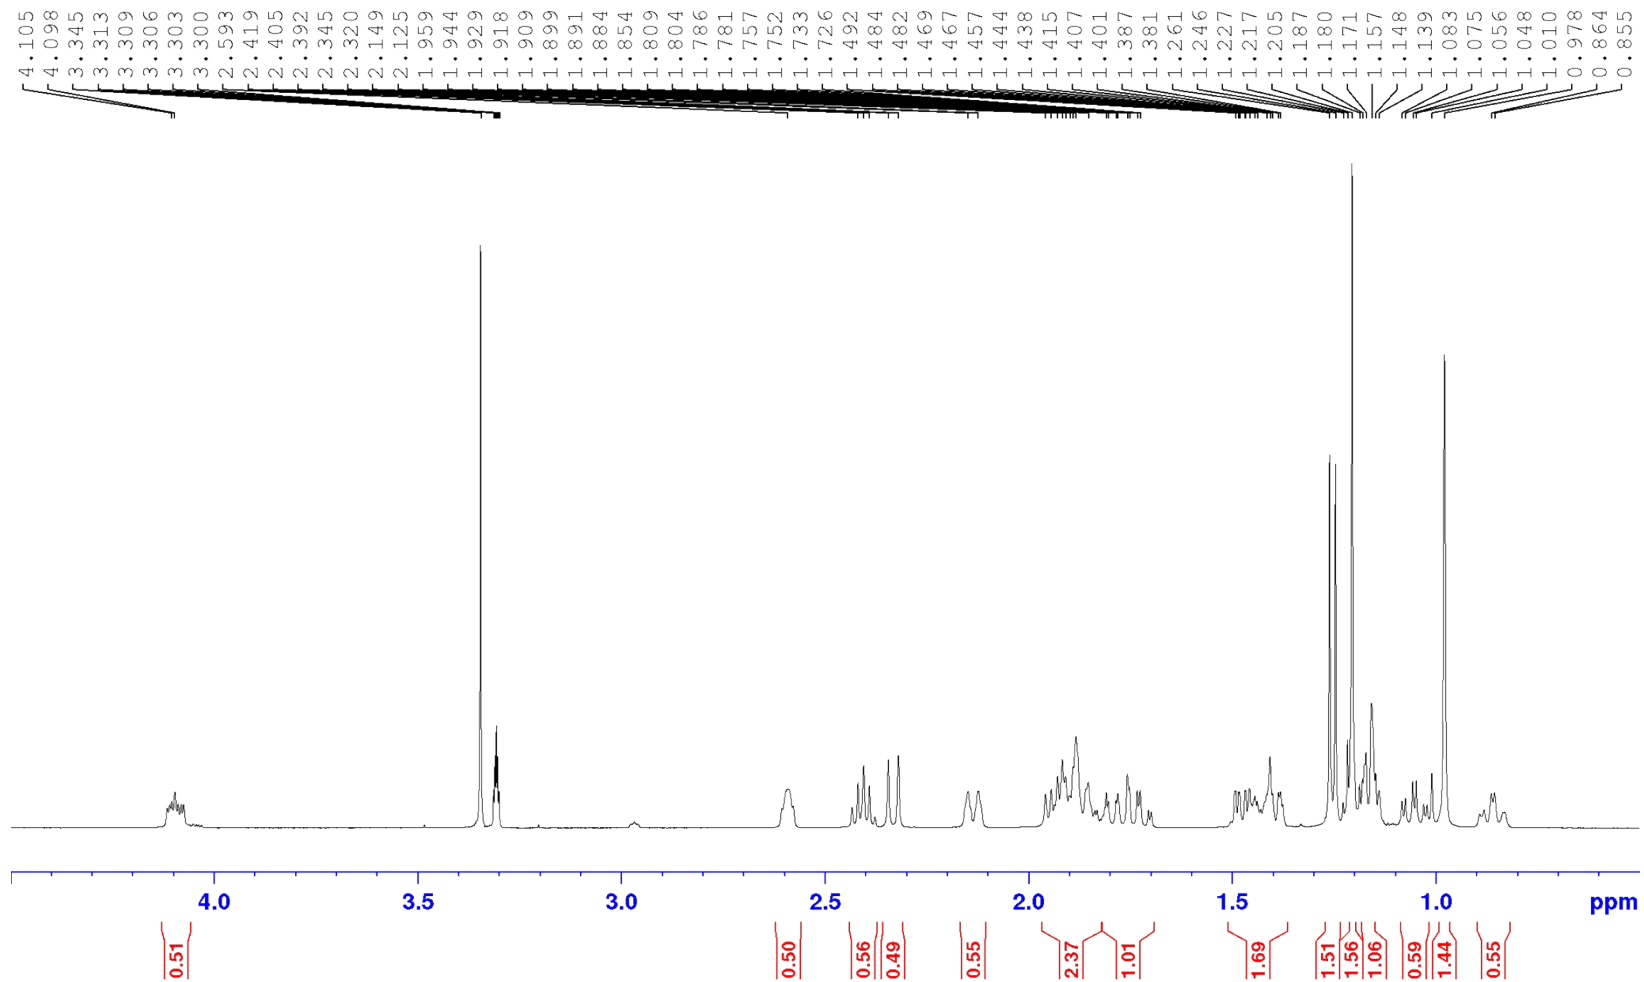

Figure S40. <sup>1</sup>H NMR spectrum of Noueinsiancin D (4) in CD<sub>3</sub>OD

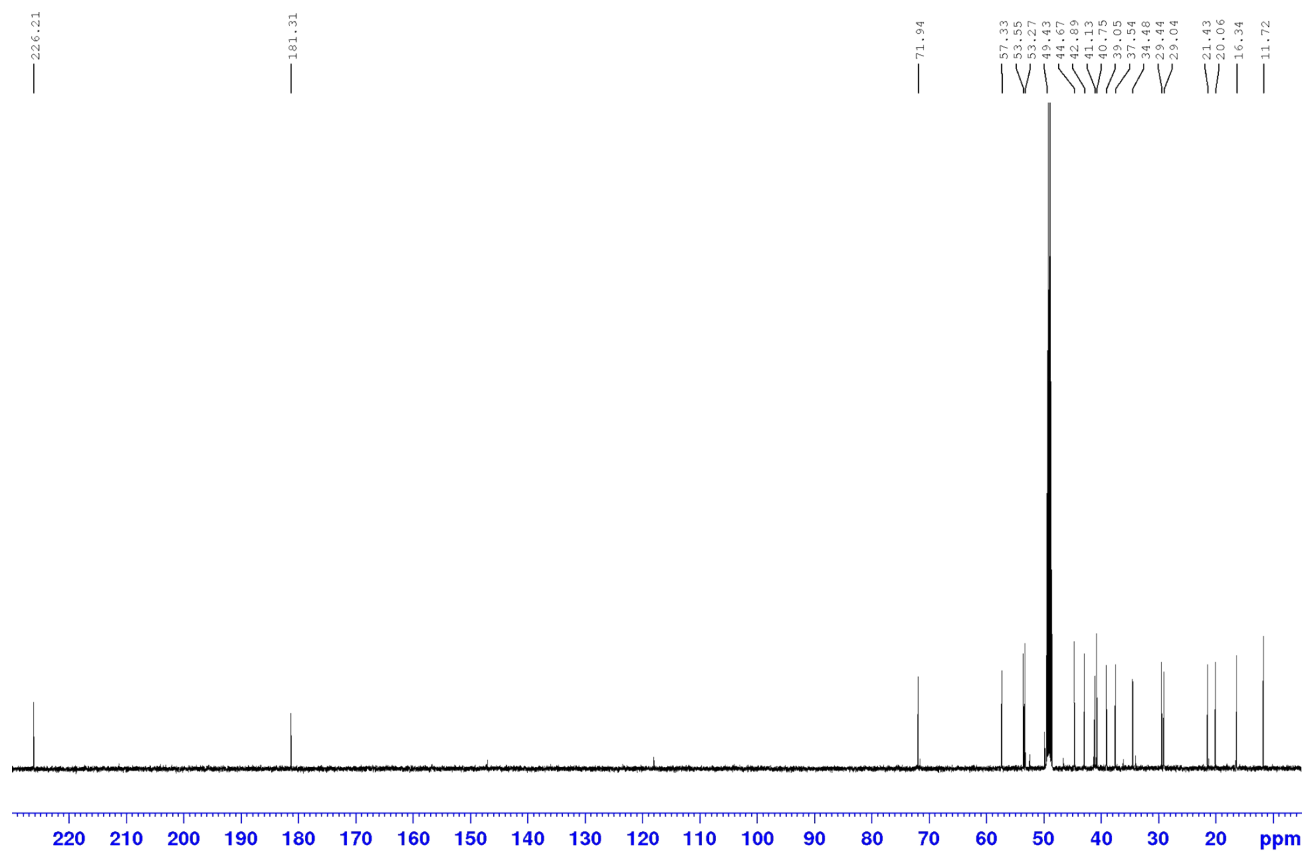

Figure S41.  $^{13}\text{C}$  NMR spectrum of Noueinsiancin D (4) in  $\text{CD}_3\text{OD}$

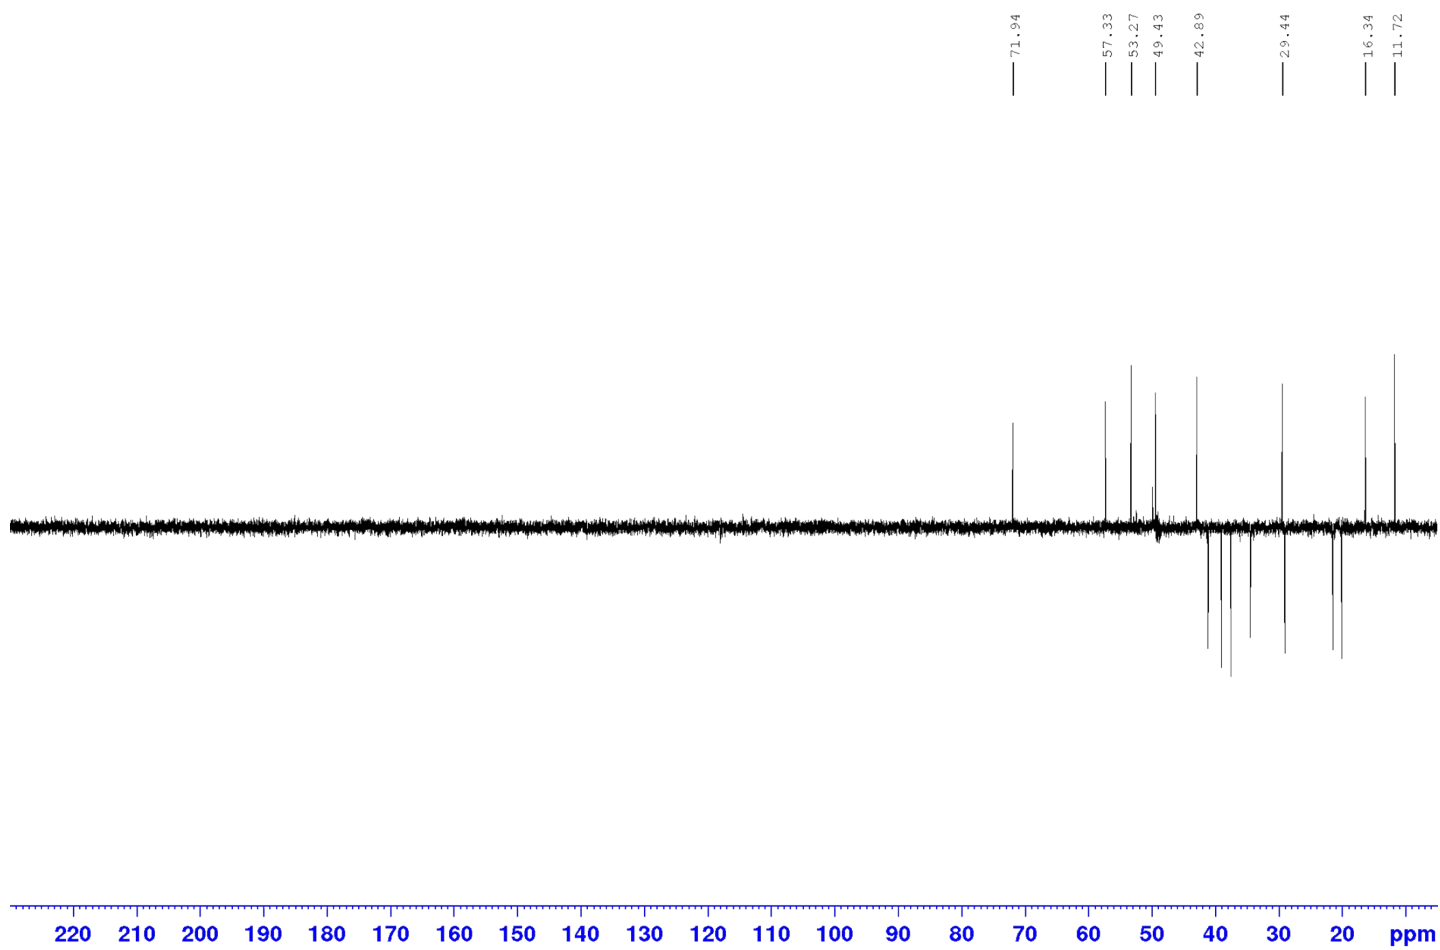

Figure S42. DEPT-135 NMR spectrum of Noueinsiancin D (4) in CD<sub>3</sub>OD

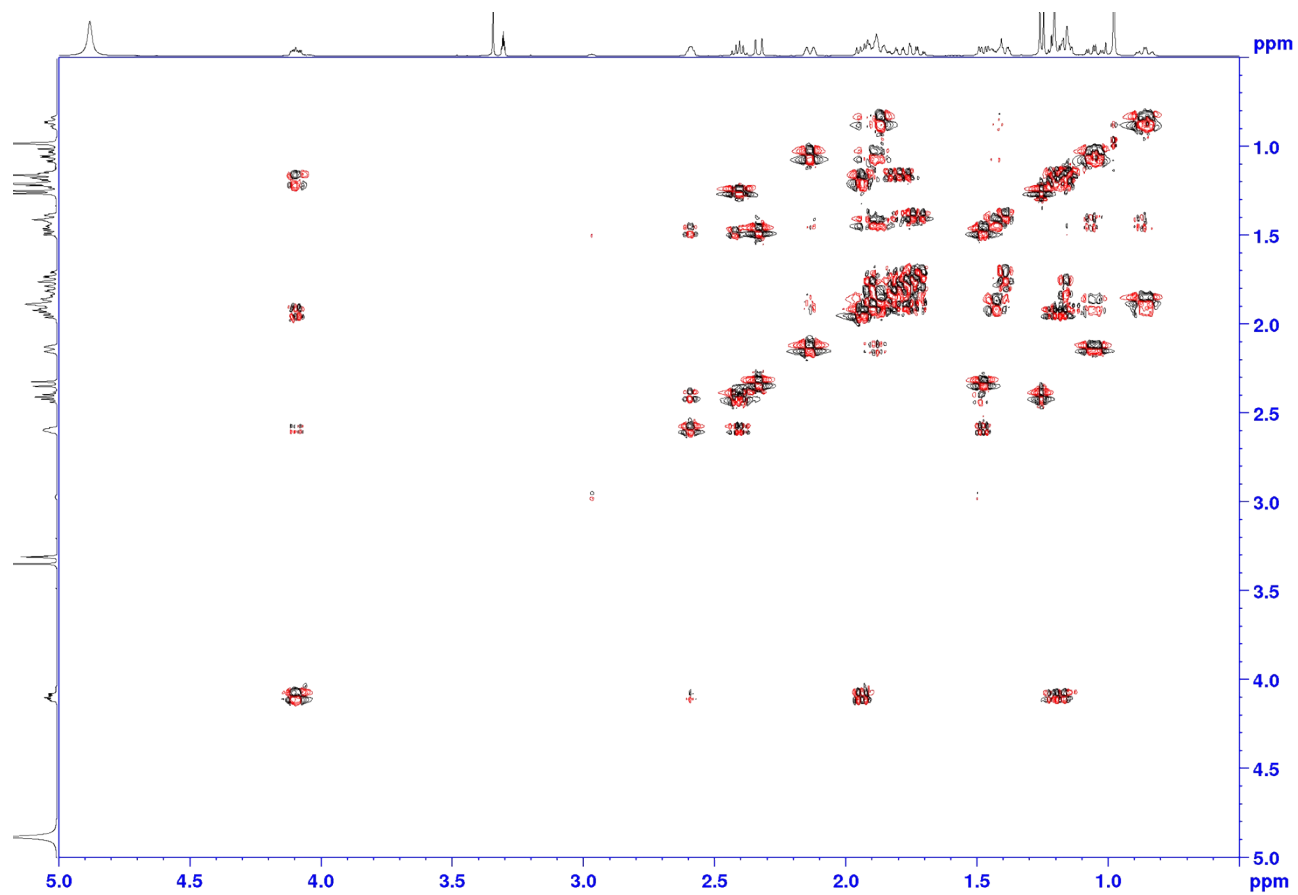

Figure S43.  $^1\text{H}$ - $^1\text{H}$  COSY spectrum of Nouveinsiancin D (4) in  $\text{CD}_3\text{OD}$

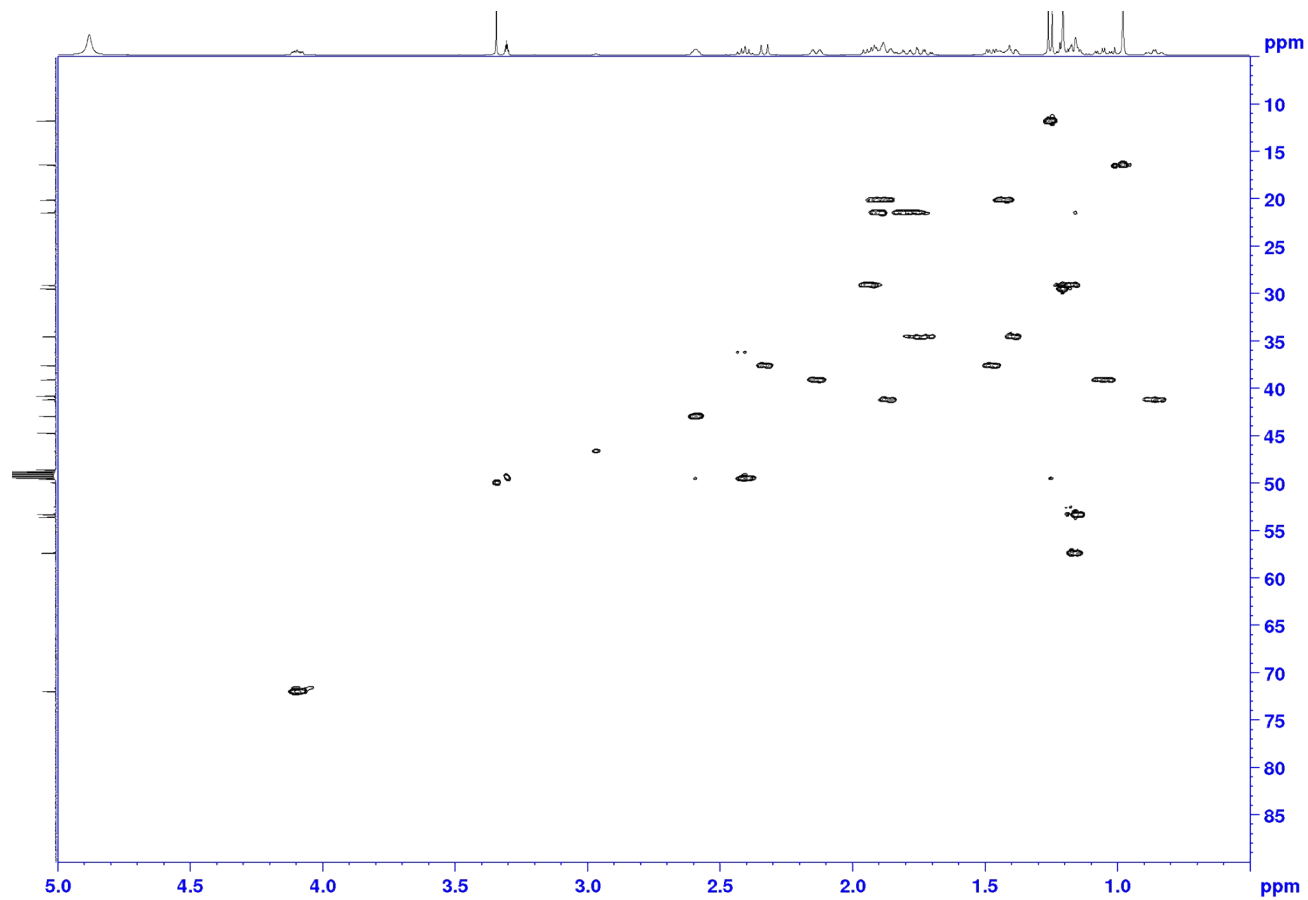

Figure S44. HSQC spectrum of Noueinsiancin D (4) in CD<sub>3</sub>OD



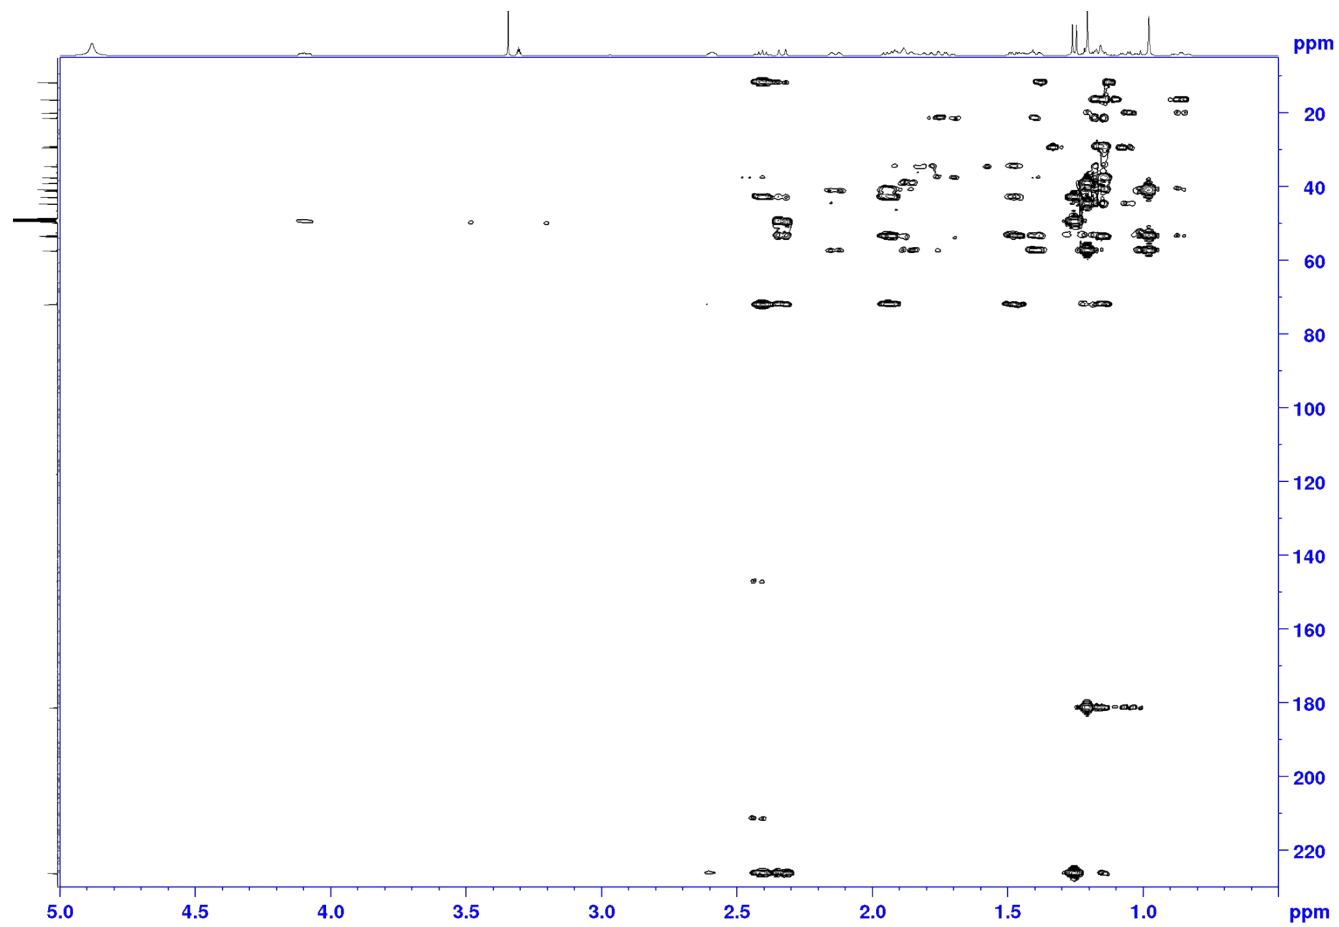

Figure S45. HMBC spectrum of Noueinsiancin D (4) in CD<sub>3</sub>OD

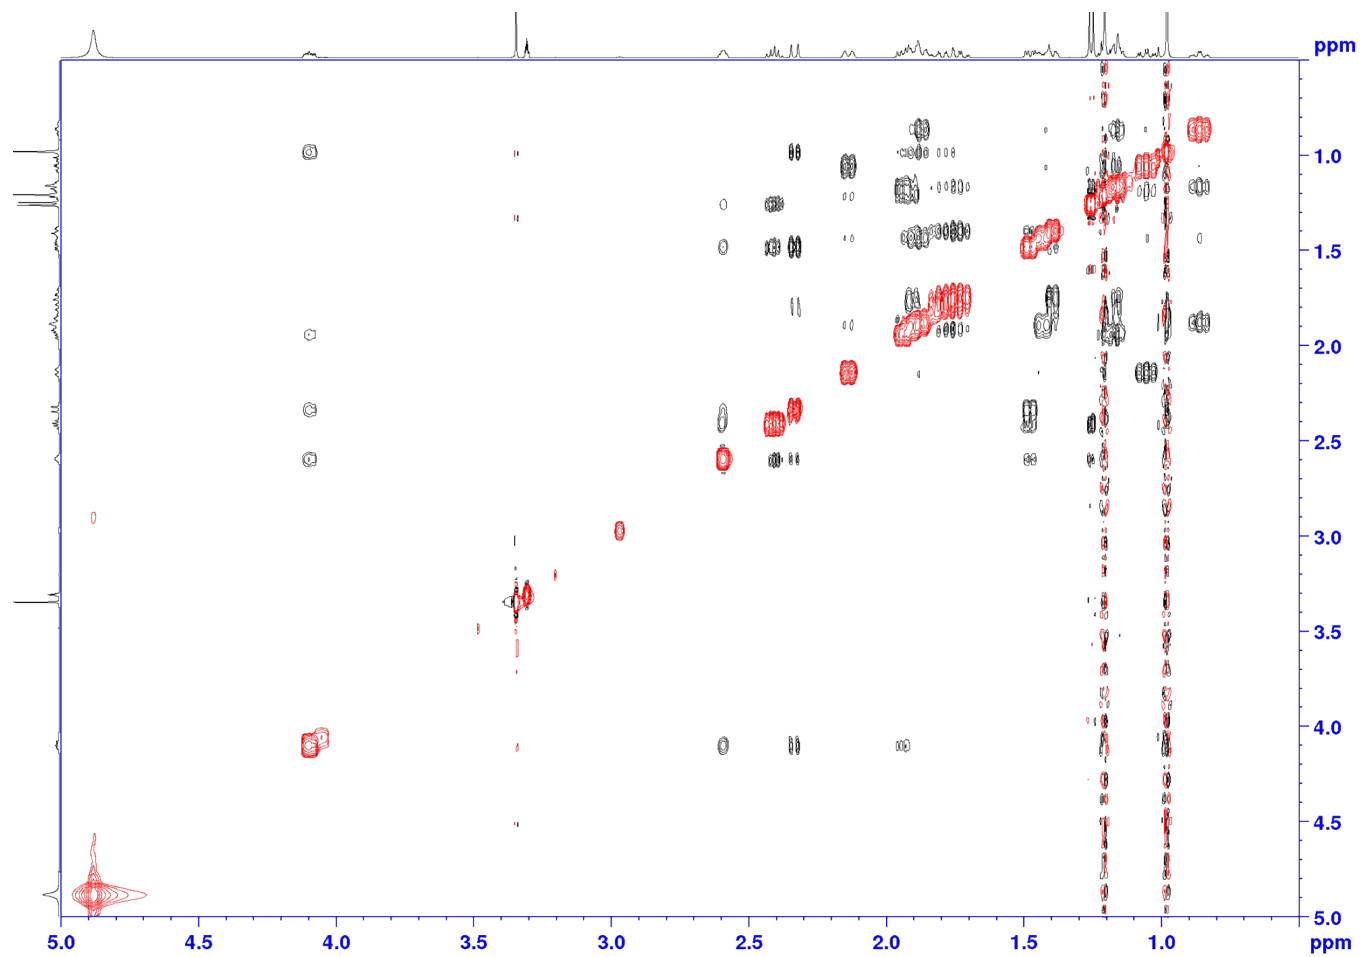

Figure S46. NOESY spectrum of Noueinsiancin D (4) in CD<sub>3</sub>OD

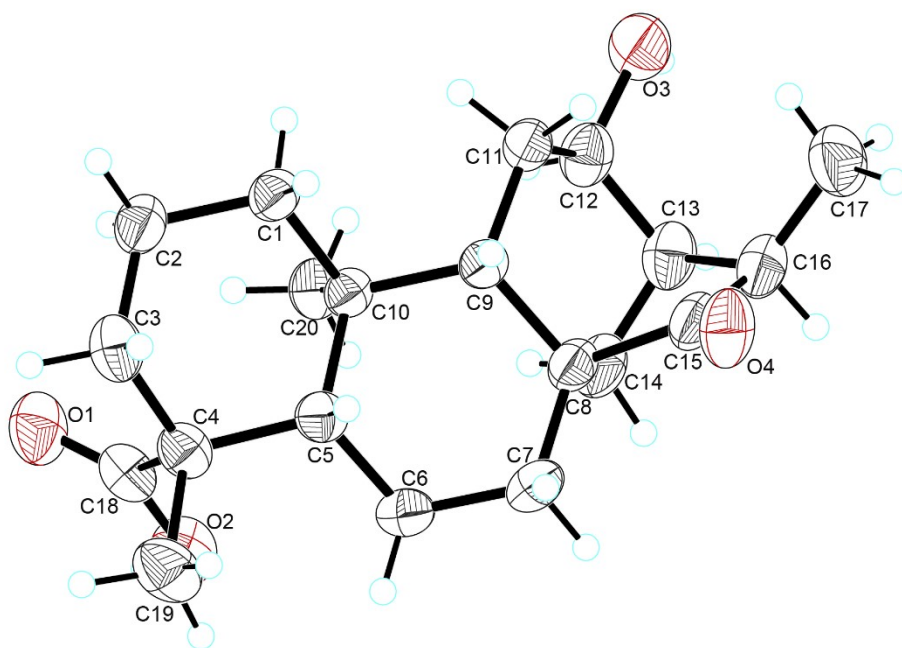

**Figure S47. X-ray structure of Noueinsiancin D (4)**

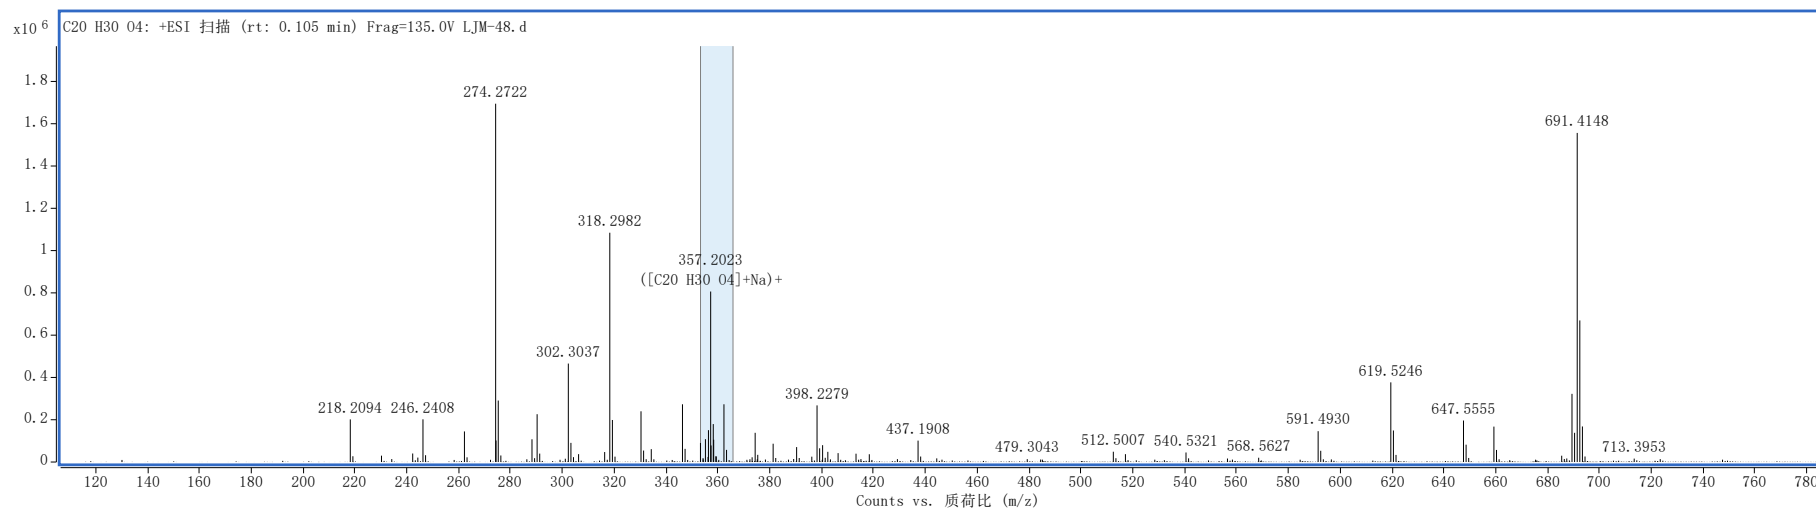

| 最佳   | ID 来源 | 分子式        | 种类      | m/z      | 分数    | Diff (ppm) | 分数 (MFG) |
|------|-------|------------|---------|----------|-------|------------|----------|
| TRUE | MFG   | C20 H30 O4 | (M+Na)+ | 357.2023 | 92.42 | 4.59       | 92.42    |

| 峰高总百分比 (Calc) | 峰高 (计算值) | 峰高百分数(计算值) | m/z (Calc) | Diff (mDa) | 峰高       | 峰高百分数 | 峰高总百分比 | m/z      | Diff (ppm) |
|---------------|----------|------------|------------|------------|----------|-------|--------|----------|------------|
| 79.8          | 809437.4 | 100        | 357.2036   | 1.3        | 807306.1 | 100   | 79.6   | 357.2023 | 3.75       |

Figure S48. HRESIMS spectrum of Noueinsiancin E (5)

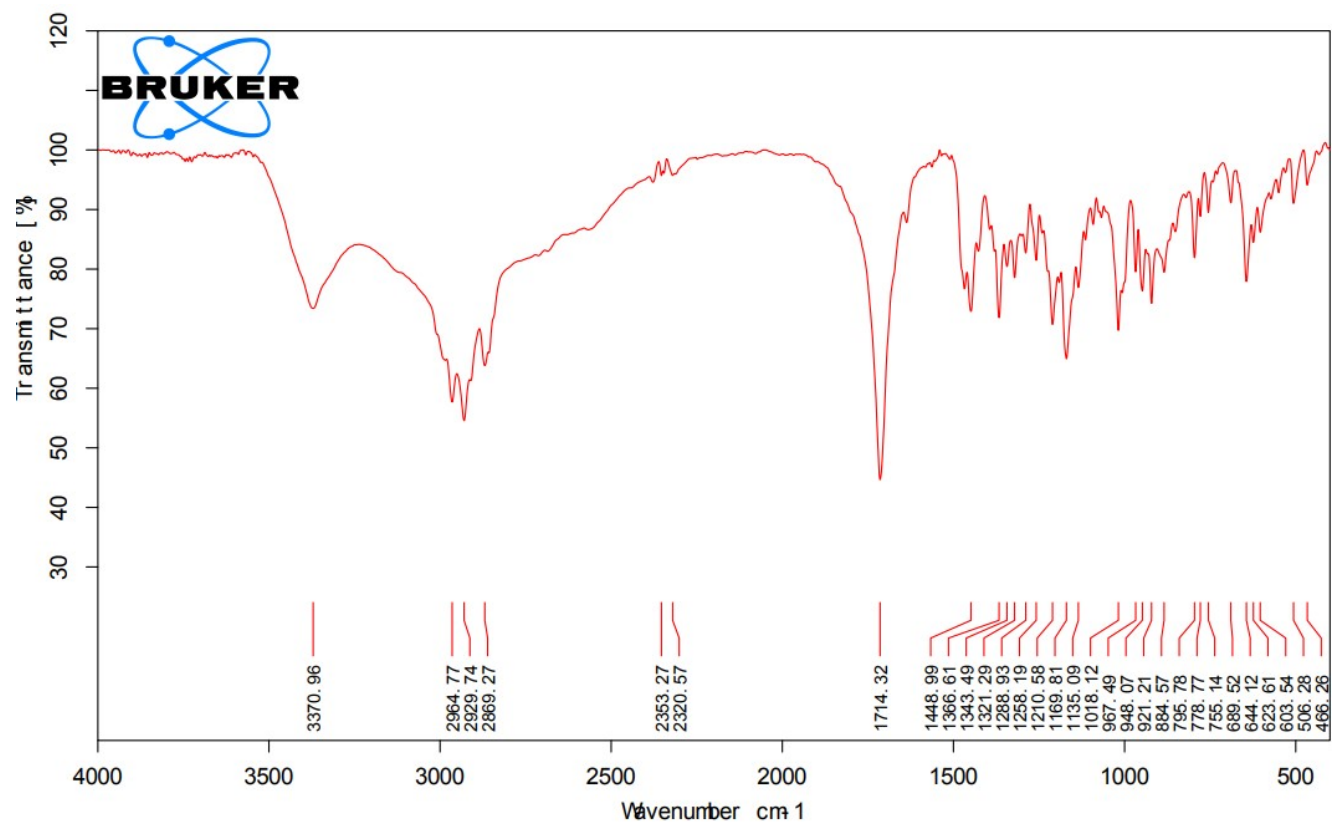

Figure S49. IR spectrum of Noueinsiancin E (5)

**Rudolph Research Analytical**

Wednesday, 02/09/2022

This sample was measured on an Autopol VI, serial number 90079,  
manufactured by Rudolph Research Analytical, Hackettstown, NJ.

LotID : LJM-48  
Set Temperature : 20.0  
Temp Corr : OFF

| <b>n</b> | <b>Average</b> | <b>Std.Dev.</b> | <b>Maximum</b> | <b>Minimum</b> |
|----------|----------------|-----------------|----------------|----------------|
| 6        | -140.167       | 0.6872          | -139.000       | -141.000       |

| <b>S.No</b> | <b>Sample ID</b> | <b>Time</b> | <b>Result</b> | <b>Scale</b> | <b>OR ° Arc</b> | <b>WLG</b> | <b>Lg.mm</b> | <b>Conc.</b> | <b>Temp.</b> | <b>Comment</b> |
|-------------|------------------|-------------|---------------|--------------|-----------------|------------|--------------|--------------|--------------|----------------|
| 1           | LJM-48           | 04:15:44 PM | -141.000      | SR           | -0.141          | 589        | 100.00       | 0.100        | 20.1         |                |
| 2           | LJM-48           | 04:15:49 PM | -141.000      | SR           | -0.141          | 589        | 100.00       | 0.100        | 20.1         |                |
| 3           | LJM-48           | 04:15:55 PM | -140.000      | SR           | -0.140          | 589        | 100.00       | 0.100        | 20.1         |                |
| 4           | LJM-48           | 04:16:01 PM | -140.000      | SR           | -0.140          | 589        | 100.00       | 0.100        | 20.1         |                |
| 5           | LJM-48           | 04:16:07 PM | -140.000      | SR           | -0.140          | 589        | 100.00       | 0.100        | 20.0         |                |
| 6           | LJM-48           | 04:16:13 PM | -139.000      | SR           | -0.139          | 589        | 100.00       | 0.100        | 20.0         |                |

\_\_\_\_\_  
Signature

**Figure S50. OR Value of Noueinsiancin E (5) in CH<sub>3</sub>OH**

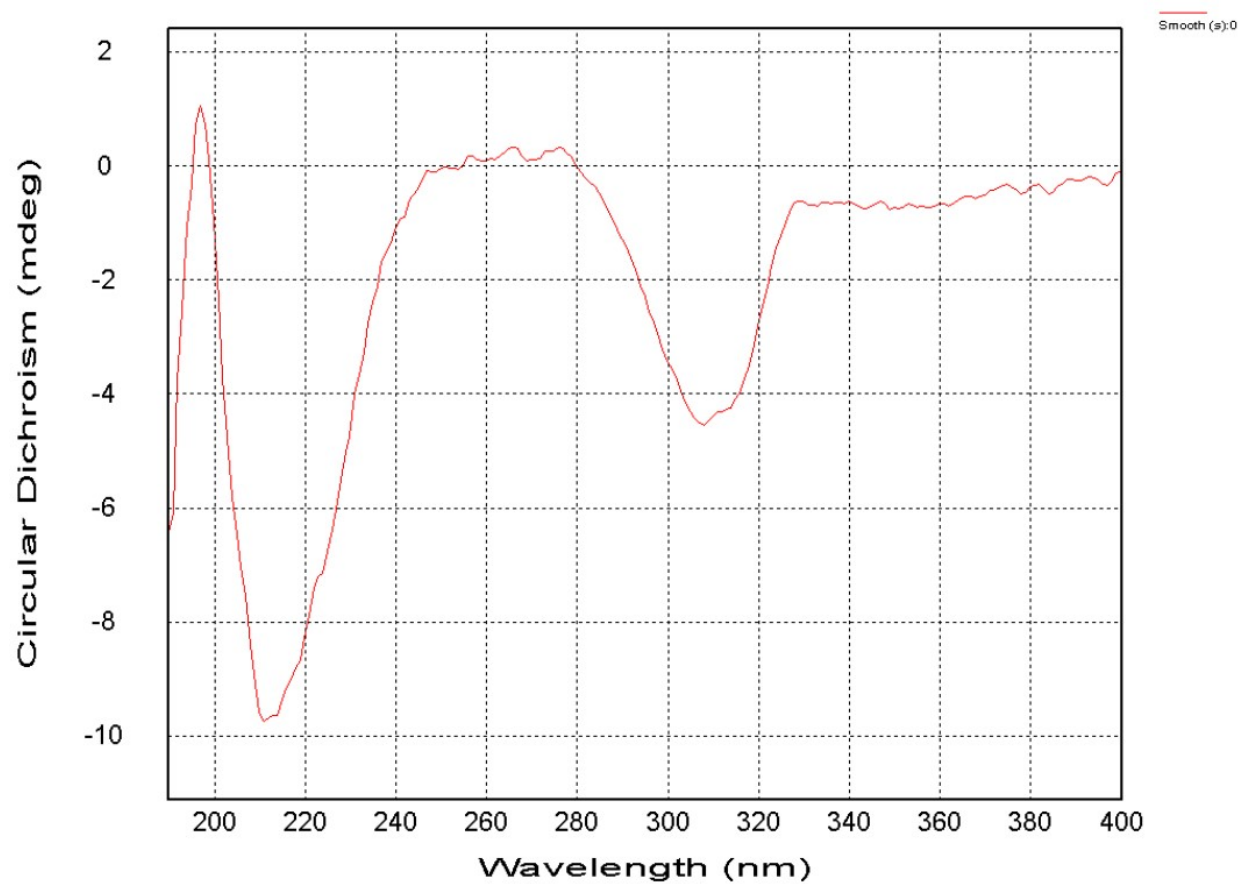

Figure S51. CD Value of Noueinsiancin E (5) in CH<sub>3</sub>OH

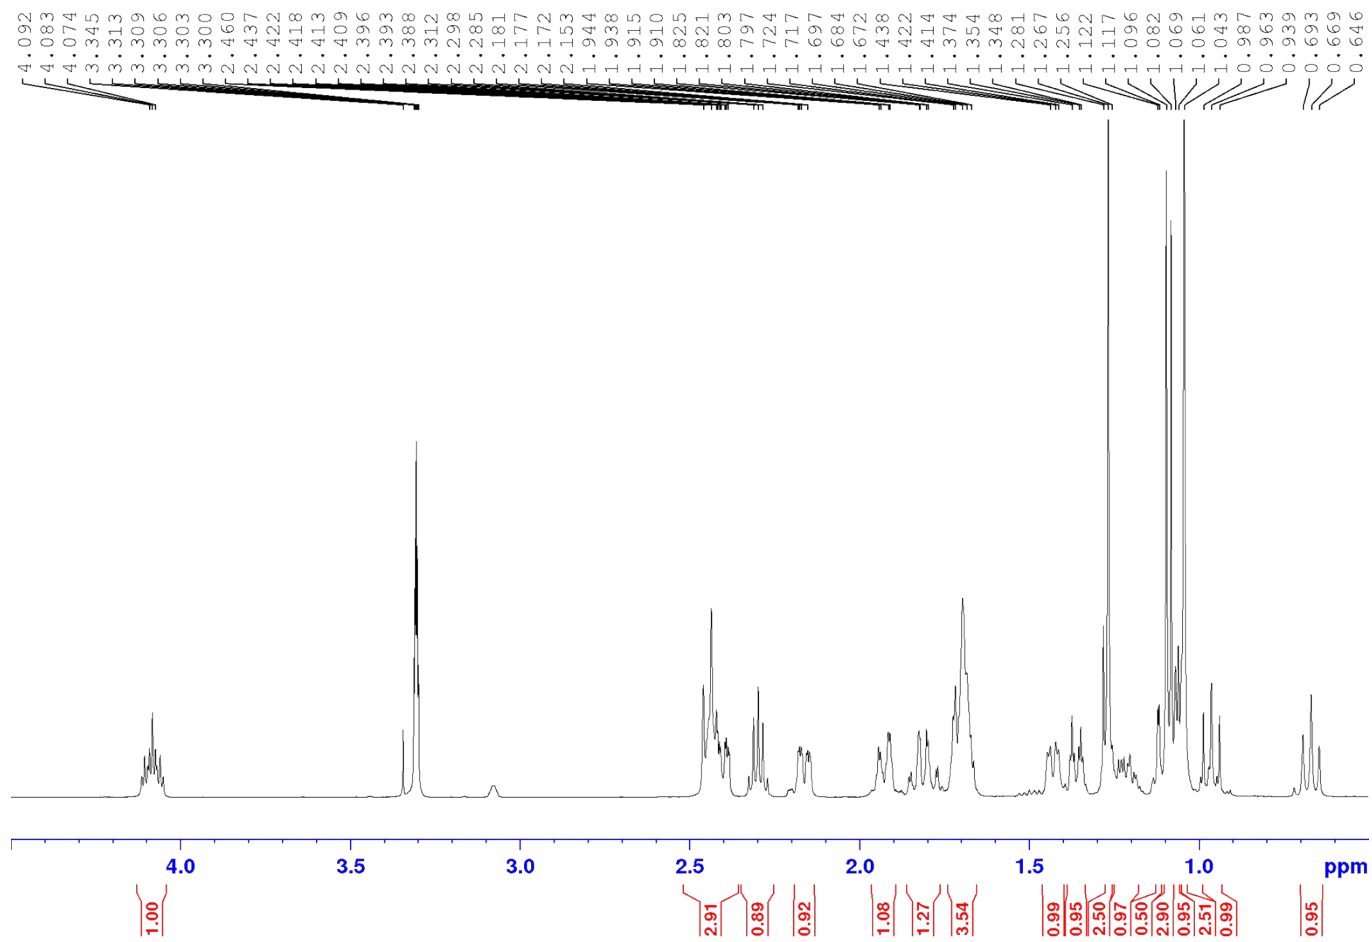

Figure S52. <sup>1</sup>H NMR spectrum of Noueinsiancin E (5) in CD<sub>3</sub>OD



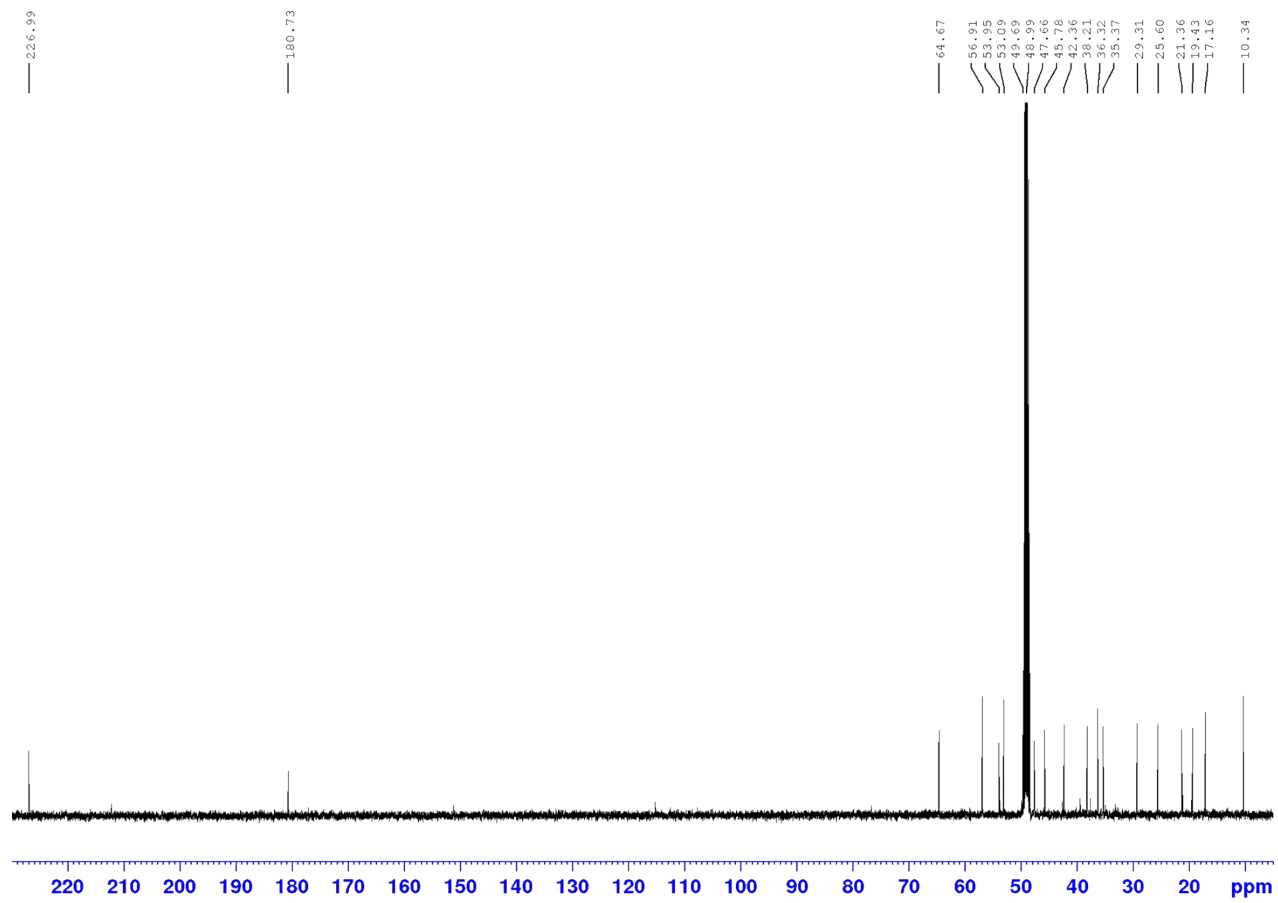

Figure S53. <sup>13</sup>C NMR spectrum of Noueinsiancin E (5) in CD<sub>3</sub>OD

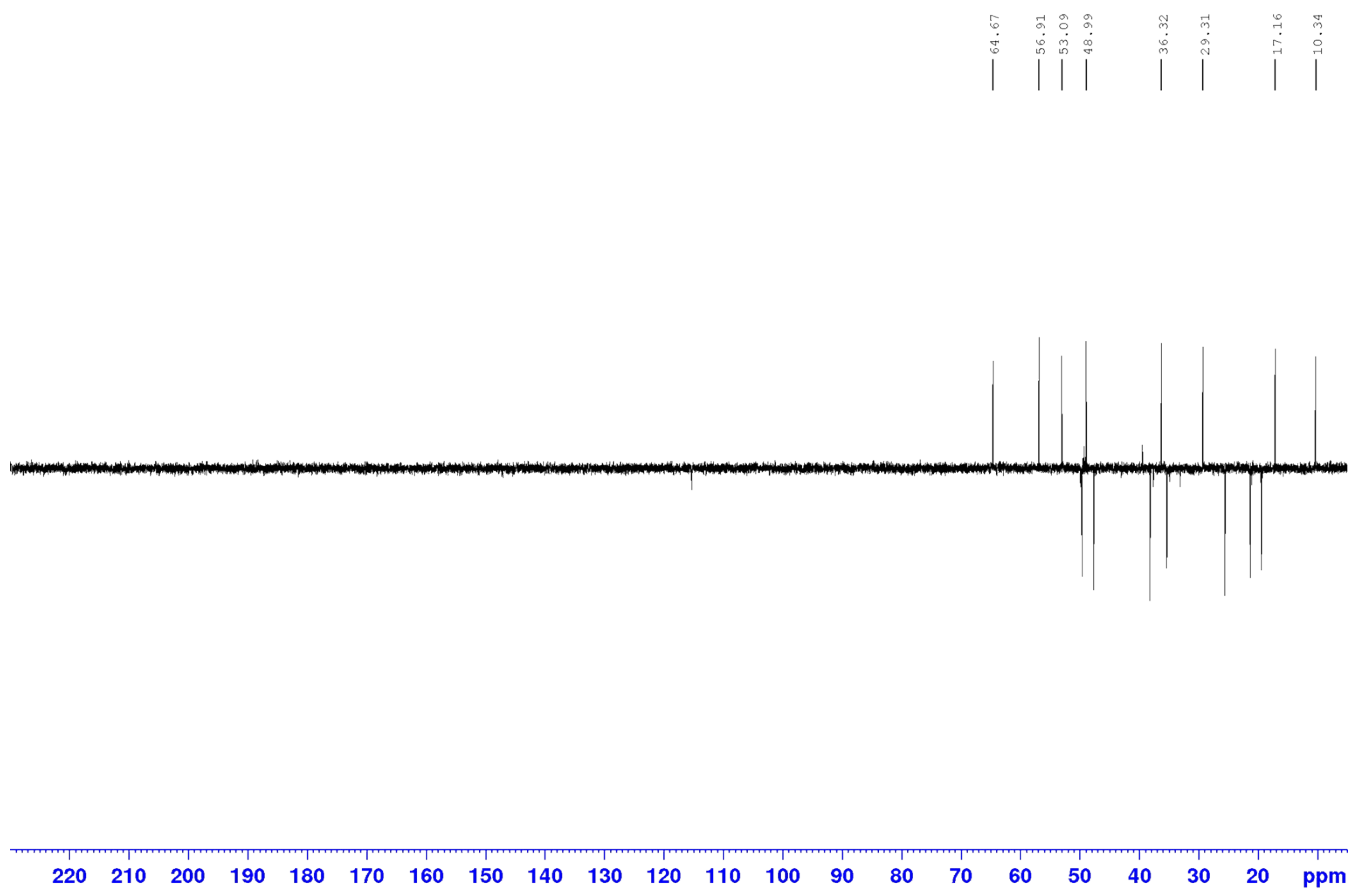

Figure S54. DEPT-135 NMR spectrum of Noueinsiancin E (5) in CD<sub>3</sub>OD

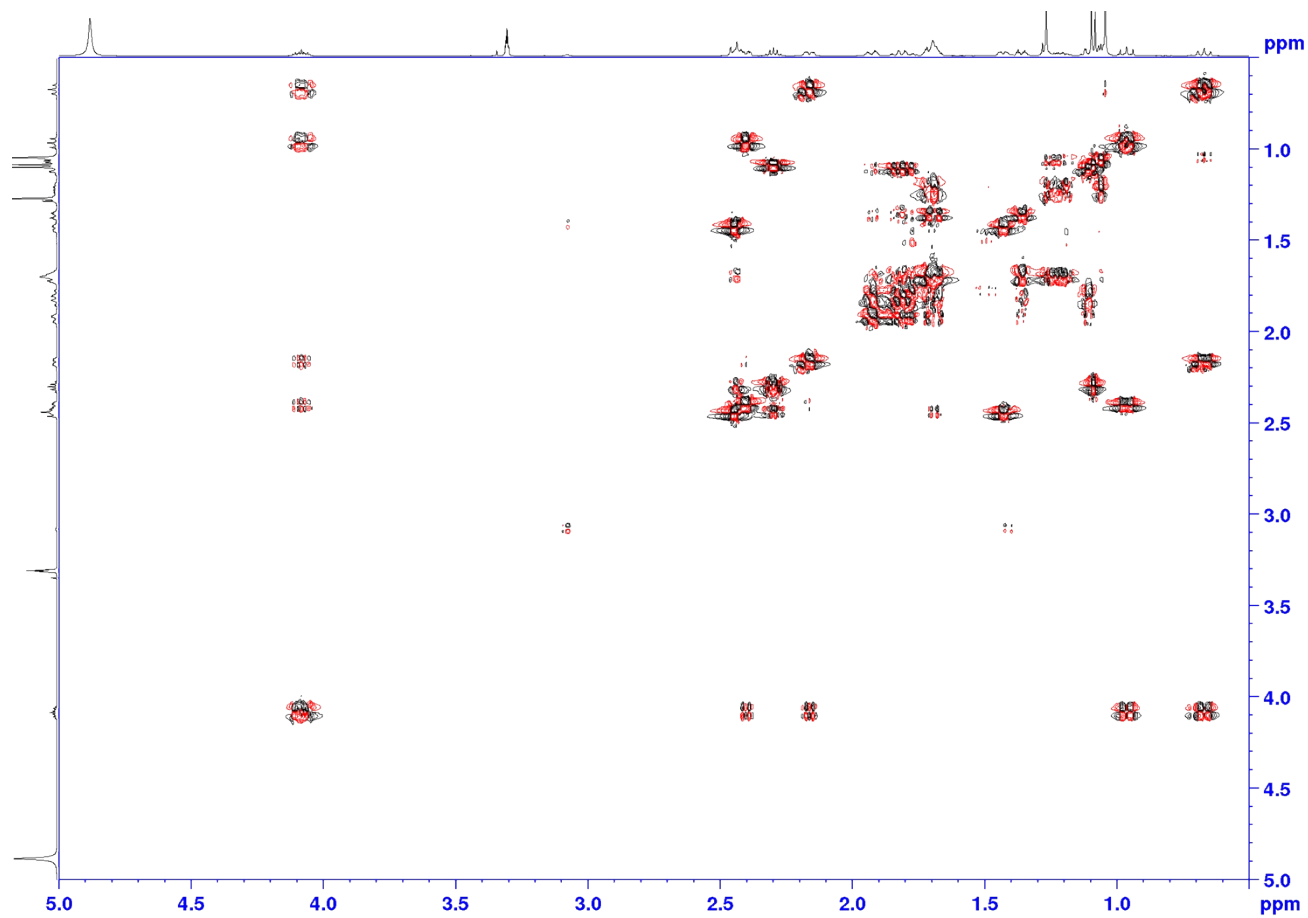

Figure S55.  $^1\text{H}$ - $^1\text{H}$  COSY spectrum of Noueinsiancin E (5) in  $\text{CD}_3\text{OD}$

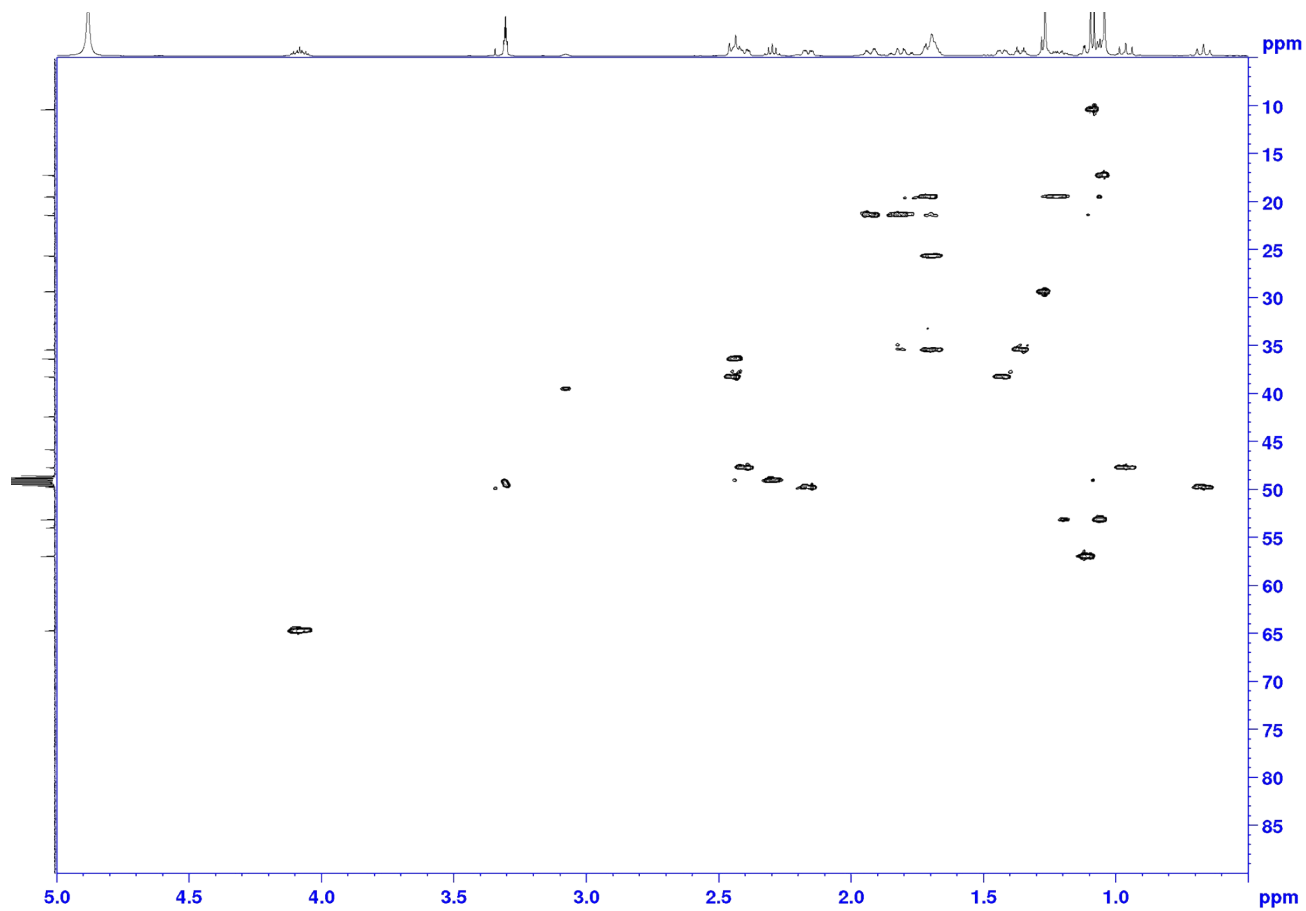

Figure S56. HSQC spectrum of Noueinsiancin E (5) in CD<sub>3</sub>OD

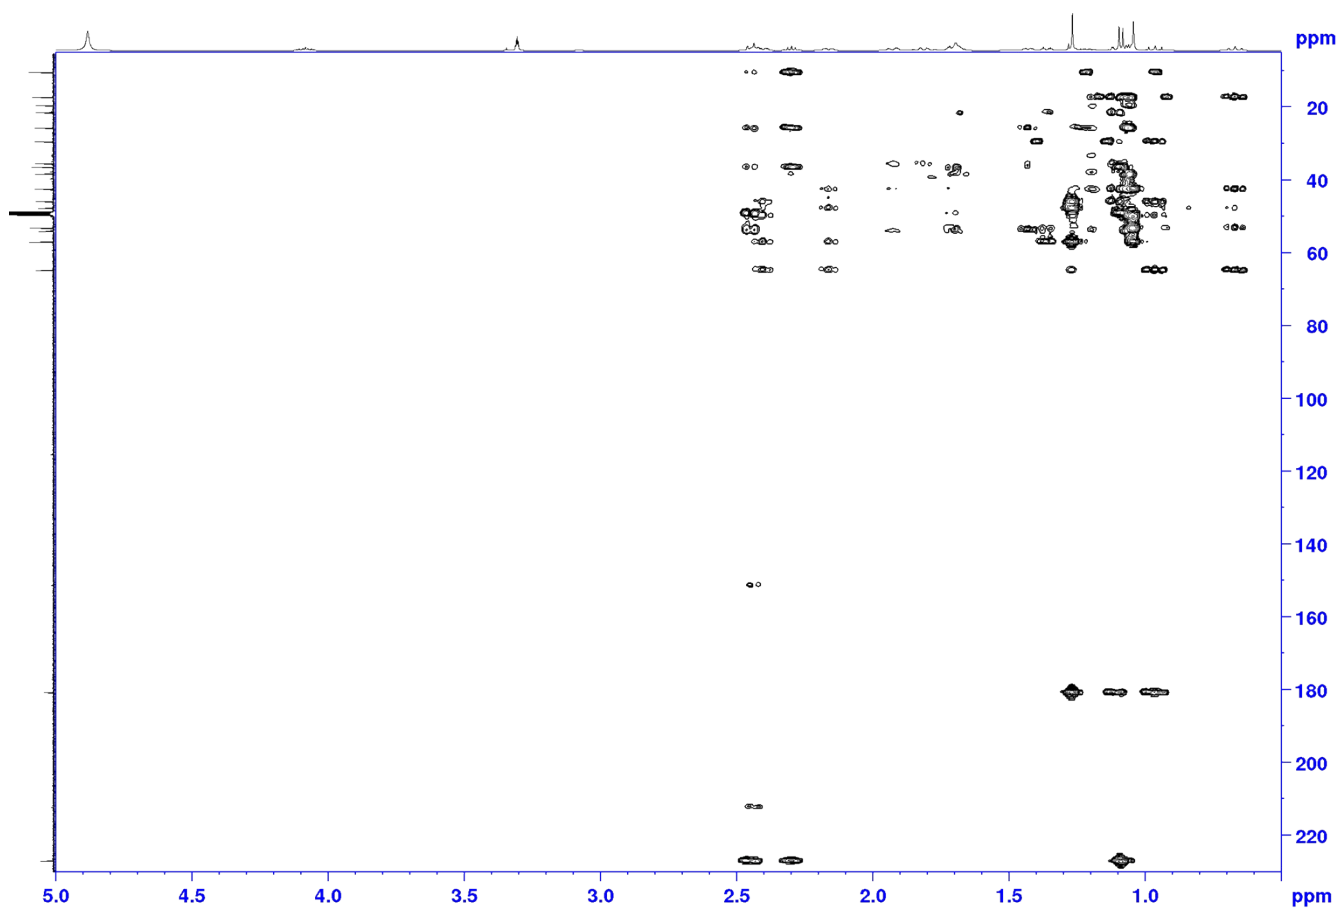

Figure S57. HMBC spectrum of Noueinsiancin E (5) in CD<sub>3</sub>OD

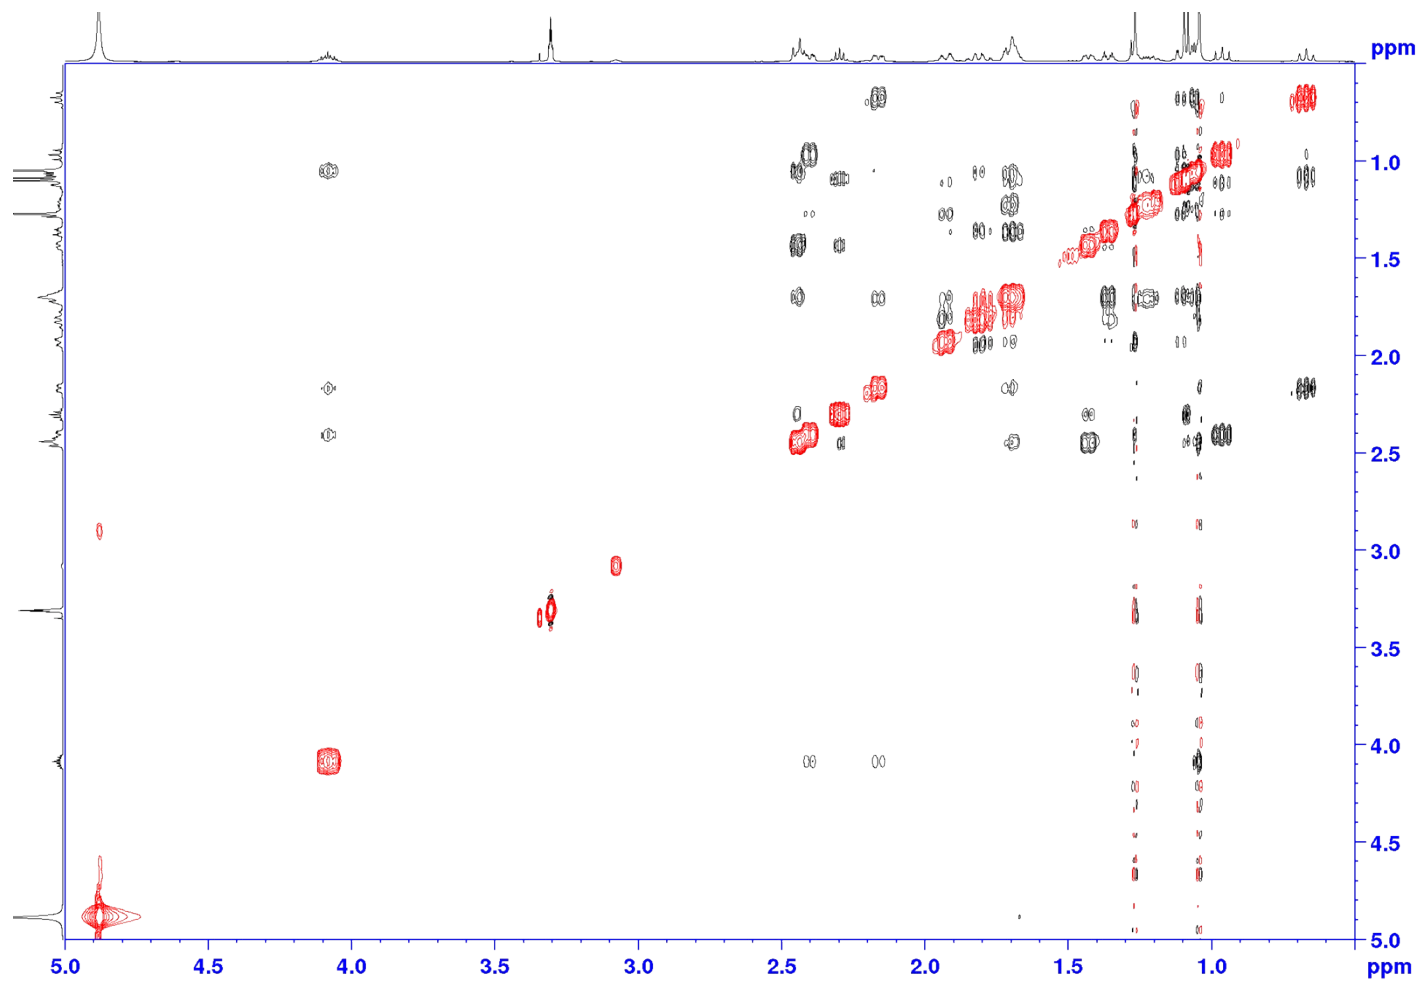

Figure S58. NOESY spectrum of Noueinsiancin E (5) in CD<sub>3</sub>OD

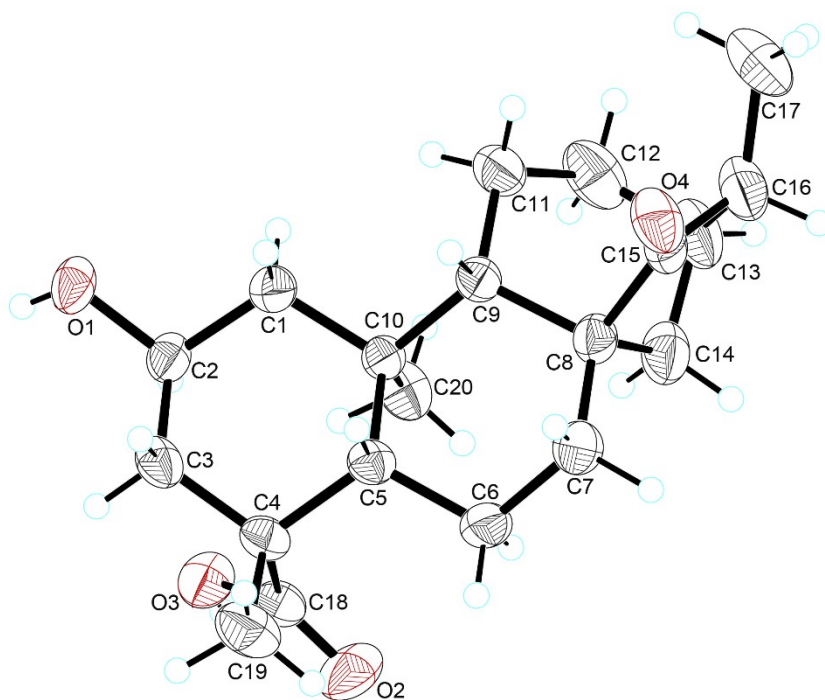

**Figure S59. X-ray structure of Nouveinsiancin E (5)**

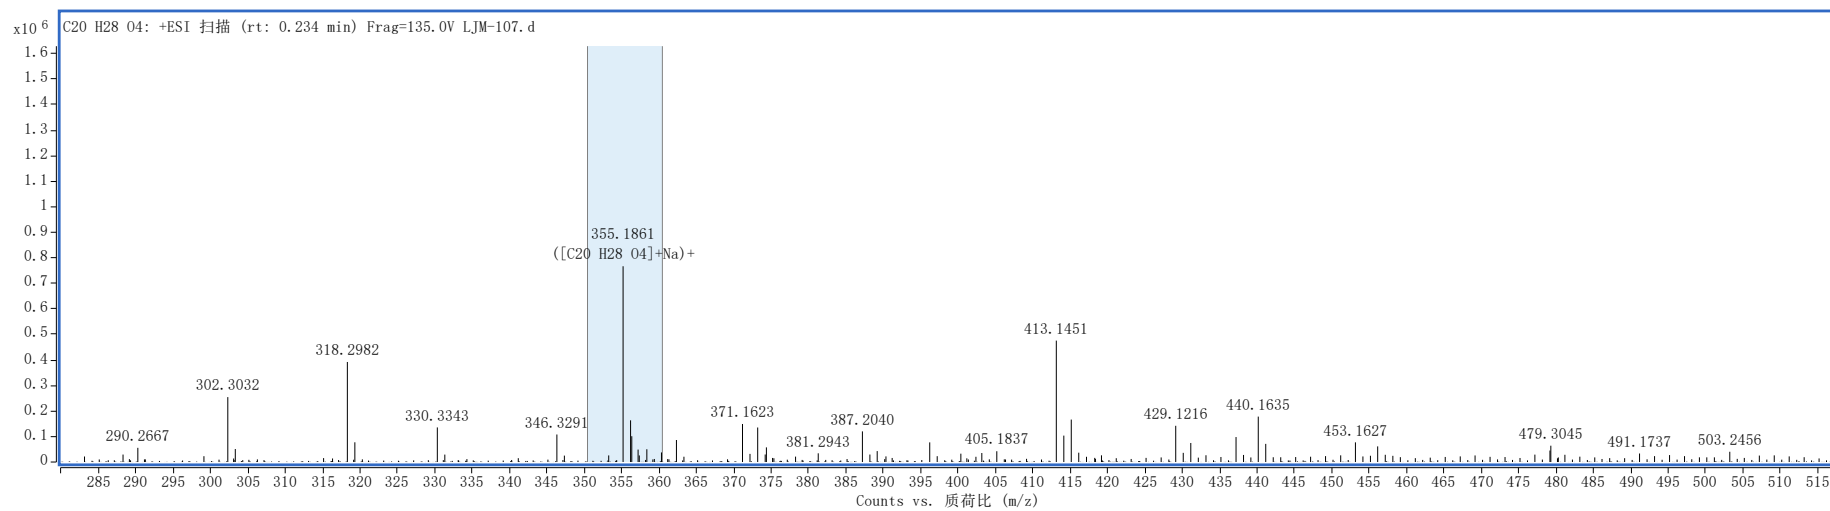

| 最佳   | ID 来源 | 分子式        | 种类      | m/z      | 分数   | Diff (ppm) | 分数 (MFG) |
|------|-------|------------|---------|----------|------|------------|----------|
| TRUE | MFG   | C20 H28 O4 | (M+Na)+ | 355.1861 | 86.1 | 5.69       | 86.1     |

| 峰高总百分比 (Calc) | 峰高 (计算值) | 峰高百分数(计算值) | m/z (Calc) | Diff (mDa) | 峰高       | 峰高百分数 | 峰高总百分比 | m/z      | Diff (ppm) |
|---------------|----------|------------|------------|------------|----------|-------|--------|----------|------------|
| 79.8          | 781568.1 | 100        | 355.188    | 1.8        | 766863.7 | 100   | 78.3   | 355.1861 | 5.17       |

Figure S60. HRESIMS spectrum of Noueinsiancin F (6)



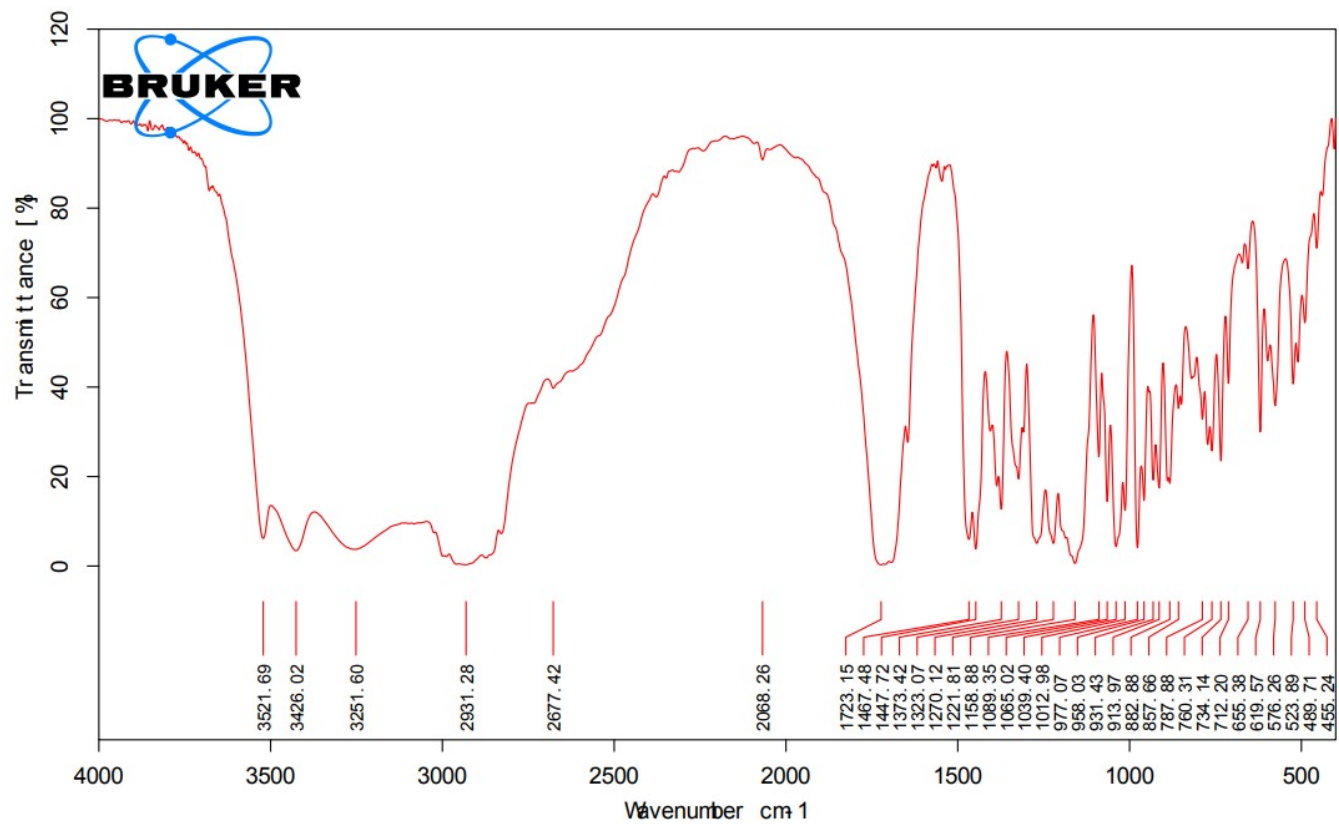

Figure S61. IR spectrum of Nouveinsiancin F (6)

**Rudolph Research Analytical**

Thursday, 02/10/2022

This sample was measured on an Autopol VI, serial number 90079,  
manufactured by Rudolph Research Analytical, Hackettstown, NJ.

LotID : LJM-109  
Set Temperature : 20.0  
Temp Corr : OFF

| <b>n</b>    | <b>Average</b>   | <b>Std.Dev.</b> | <b>Maximum</b> | <b>Minimum</b> |                |            |              |              |              |                |
|-------------|------------------|-----------------|----------------|----------------|----------------|------------|--------------|--------------|--------------|----------------|
| 6           | -116.667         | 0.9428          | -116.000       | -118.000       |                |            |              |              |              |                |
| <b>S.No</b> | <b>Sample ID</b> | <b>Time</b>     | <b>Result</b>  | <b>Scale</b>   | <b>OR °Arc</b> | <b>WLG</b> | <b>Lg.mm</b> | <b>Conc.</b> | <b>Temp.</b> | <b>Comment</b> |
| 1           | LJM-109          | 08:01:05 PM     | -116.000       | SR             | -0.058         | 589        | 100.00       | 0.050        | 19.7         |                |
| 2           | LJM-109          | 08:01:10 PM     | -118.000       | SR             | -0.059         | 589        | 100.00       | 0.050        | 19.7         |                |
| 3           | LJM-109          | 08:01:16 PM     | -116.000       | SR             | -0.058         | 589        | 100.00       | 0.050        | 19.7         |                |
| 4           | LJM-109          | 08:01:21 PM     | -118.000       | SR             | -0.059         | 589        | 100.00       | 0.050        | 19.7         |                |
| 5           | LJM-109          | 08:01:27 PM     | -116.000       | SR             | -0.058         | 589        | 100.00       | 0.050        | 19.7         |                |
| 6           | LJM-109          | 08:01:32 PM     | -116.000       | SR             | -0.058         | 589        | 100.00       | 0.050        | 19.8         |                |

\_\_\_\_\_  
Signature

**Figure S62. OR Value of Noueinsiancin F (6) in CH<sub>3</sub>OH**

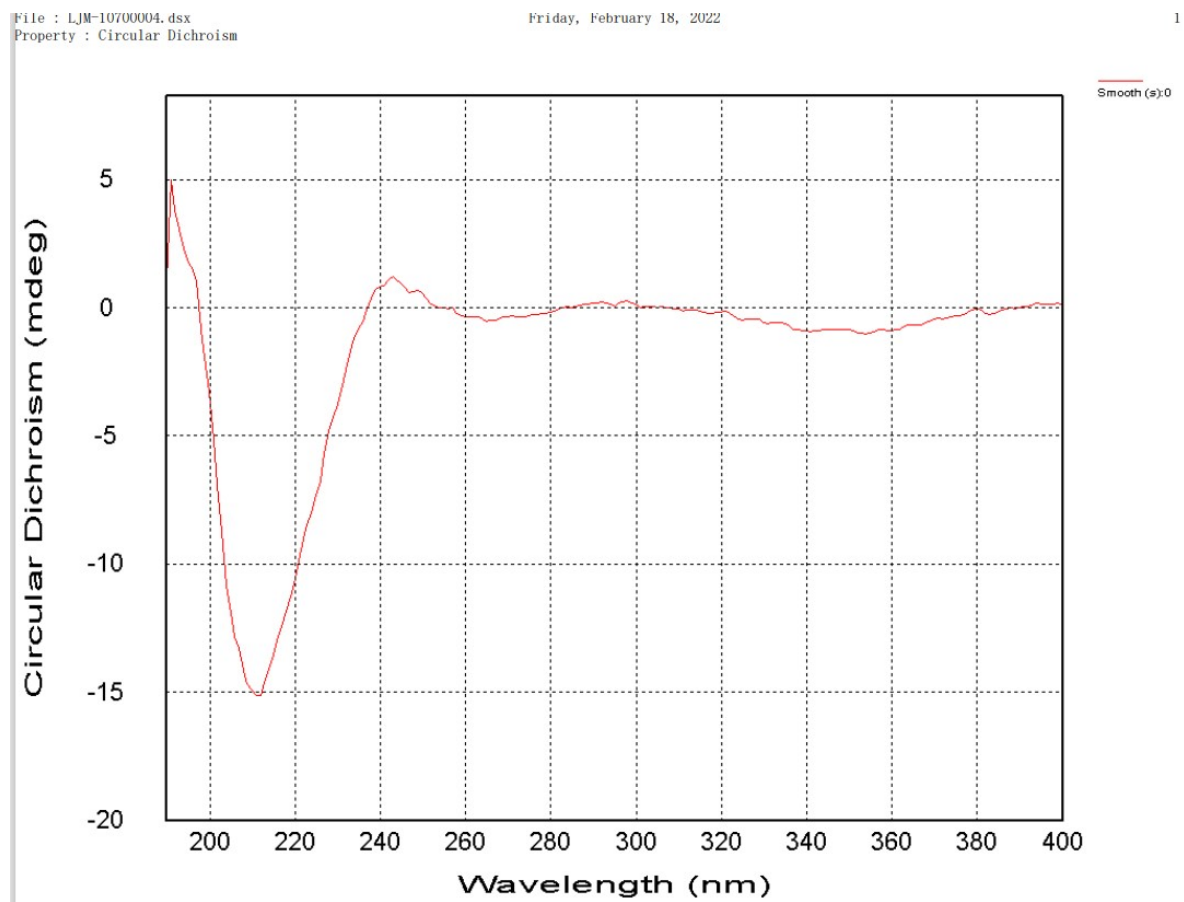

Figure S63. CD Value of Nouveinsancin F (6) in CH<sub>3</sub>OH

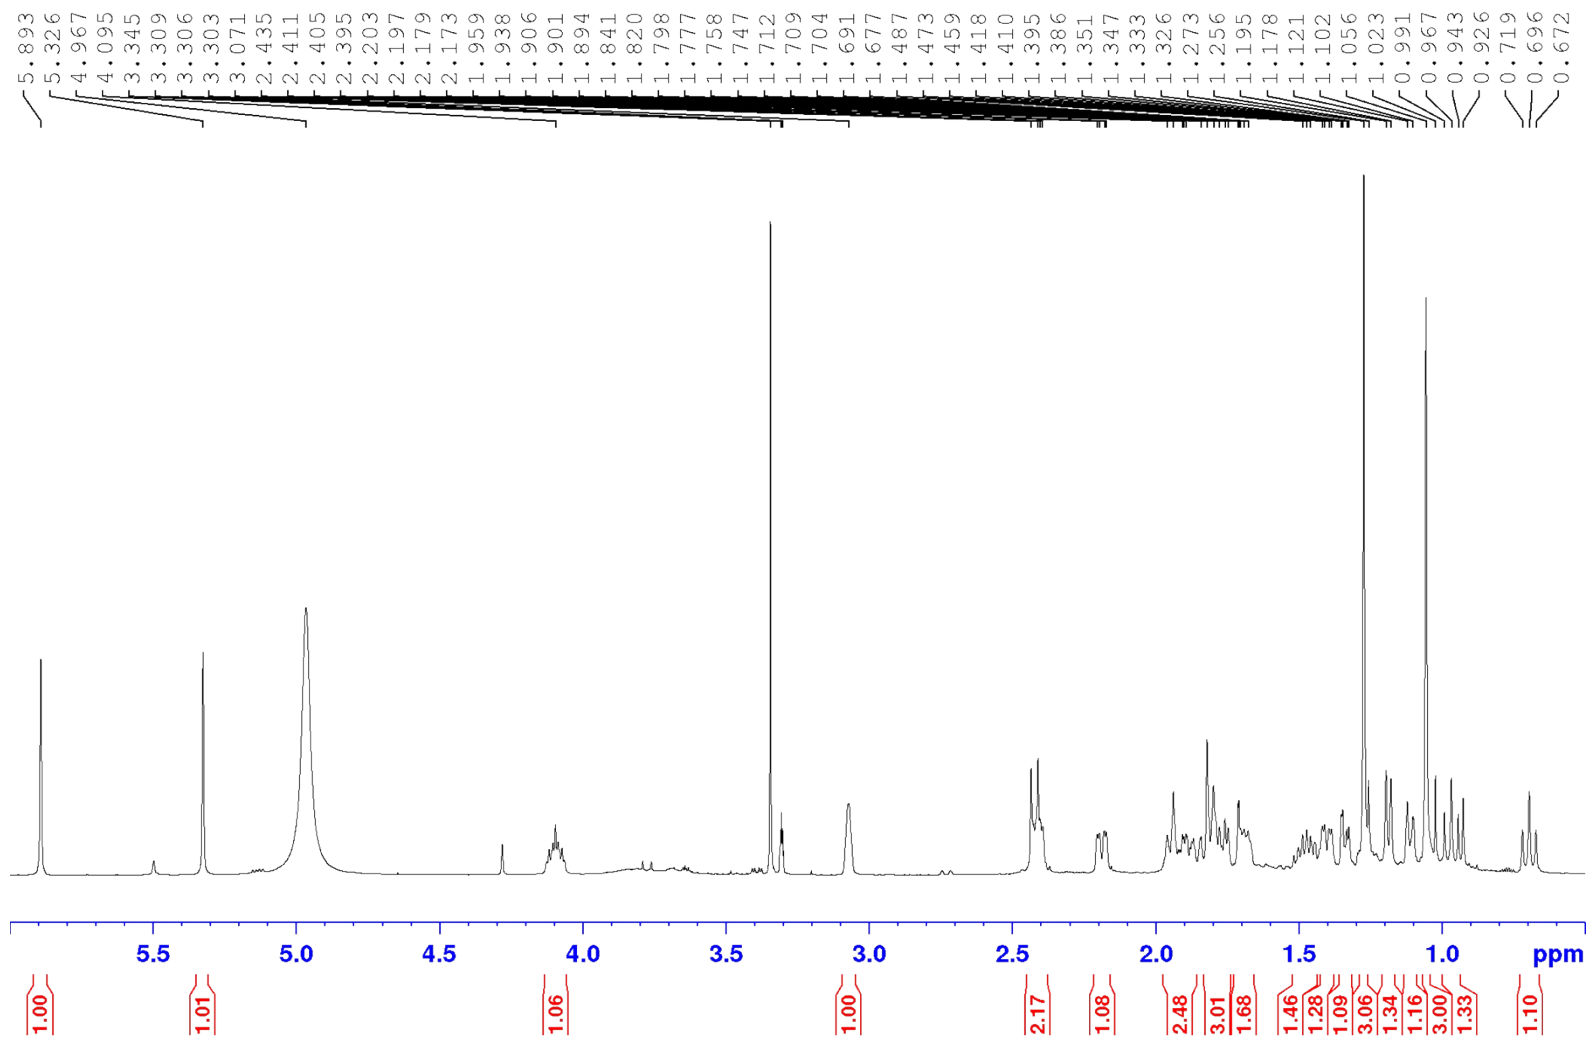

Figure S64. <sup>1</sup>H NMR spectrum of Noueinsiancin F (6) in CD<sub>3</sub>OD

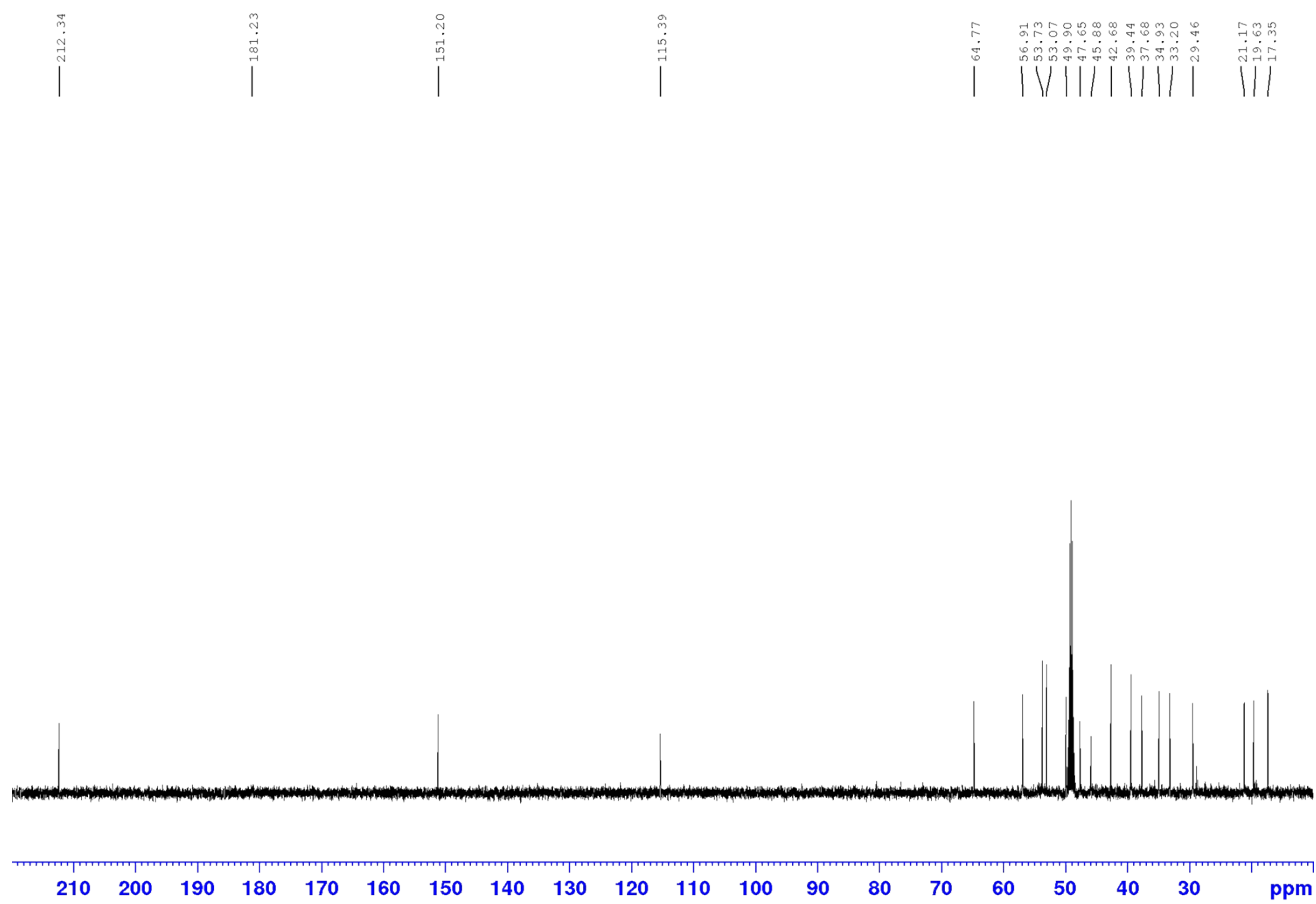

Figure S65.  $^{13}\text{C}$  NMR spectrum of Nouveinsiancin F (6) in  $\text{CD}_3\text{OD}$

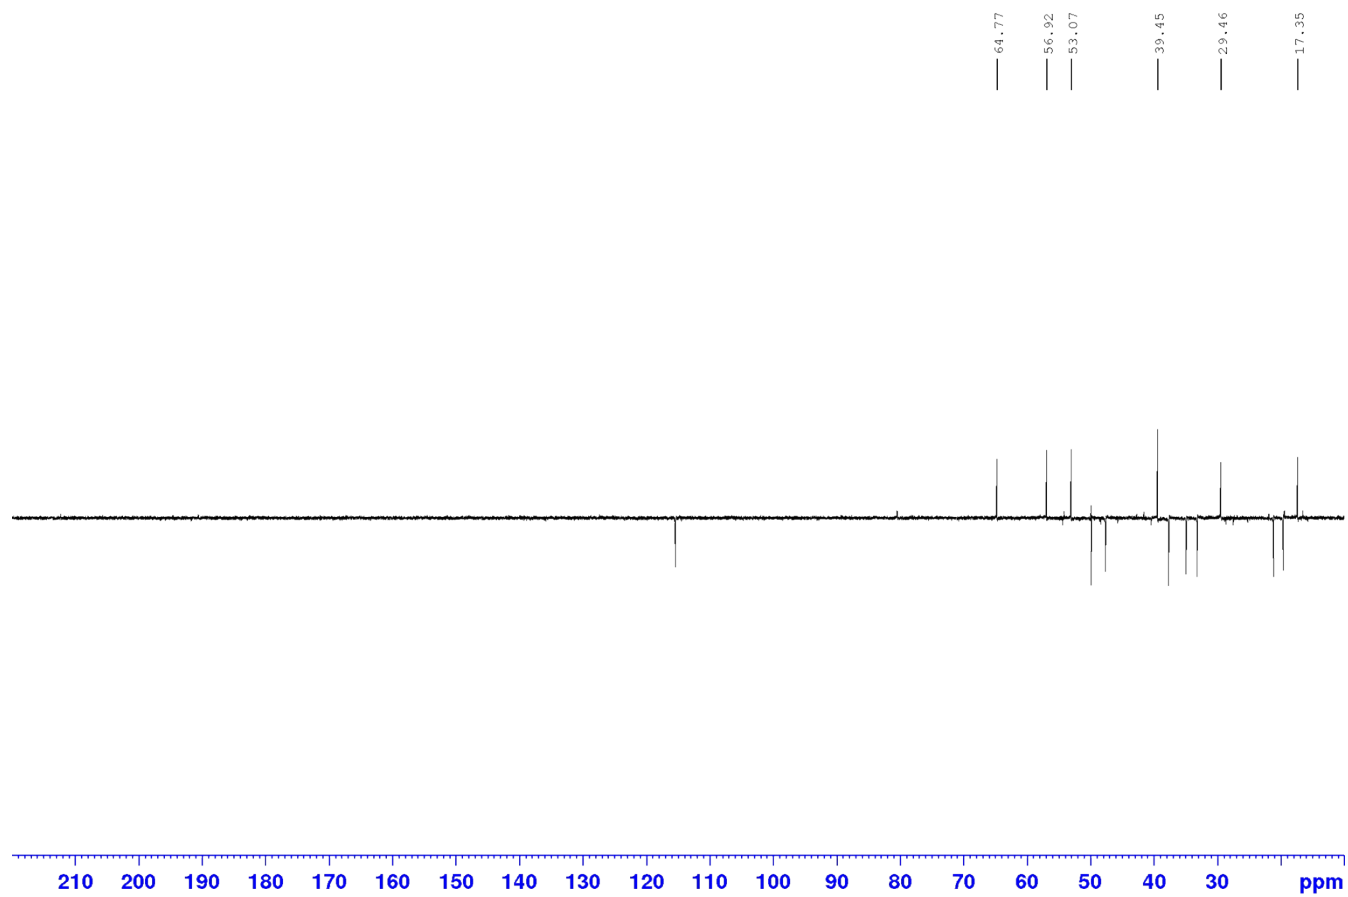

Figure S66. DEPT-135 NMR spectrum of Noueinsiancin F (6) in CD<sub>3</sub>OD

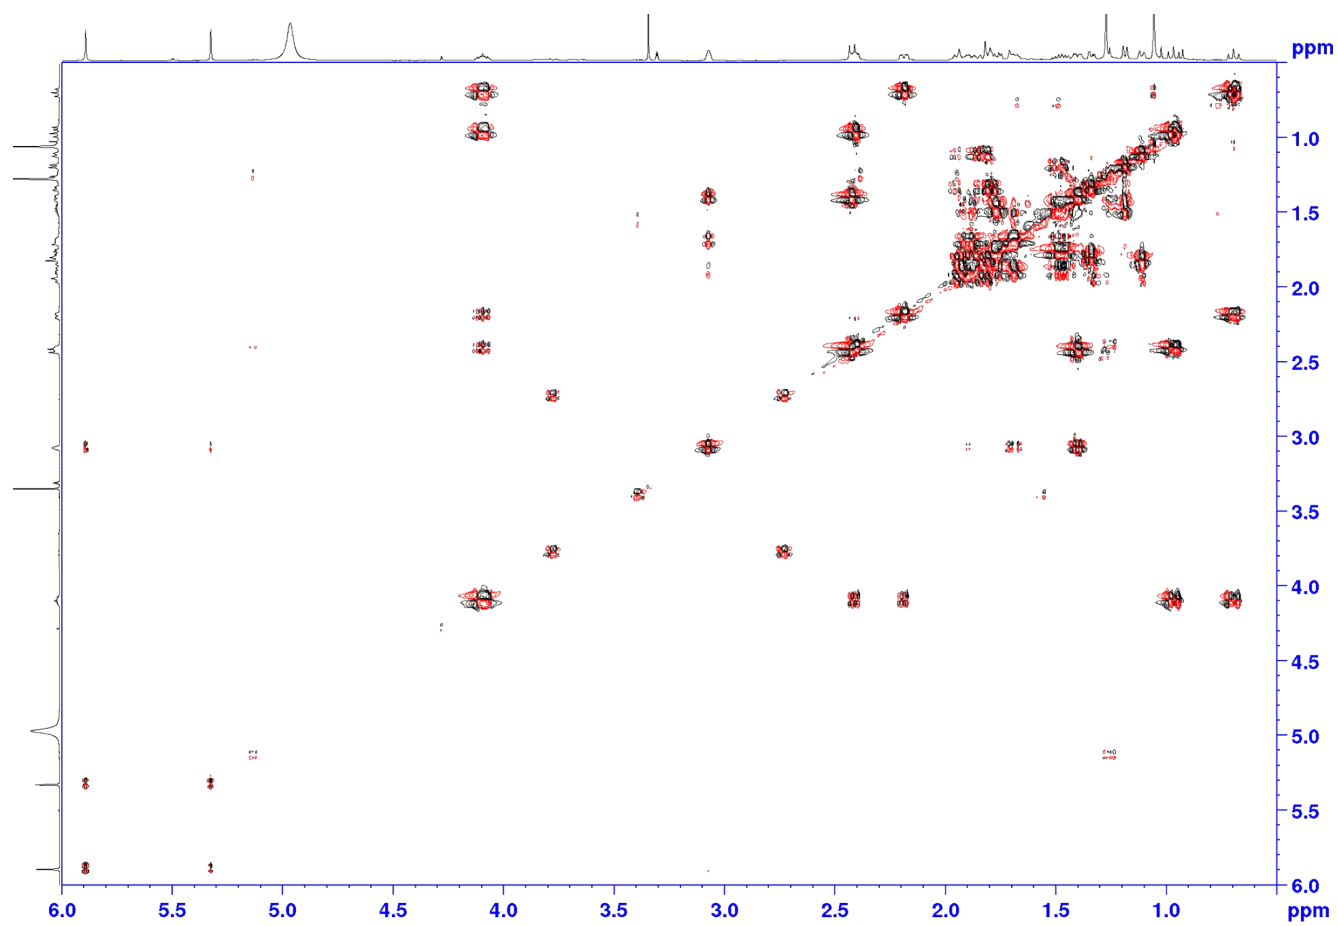

Figure S67.  $^1\text{H}$ - $^1\text{H}$  COSY spectrum of Nouveinsancin F (6) in  $\text{CD}_3\text{OD}$

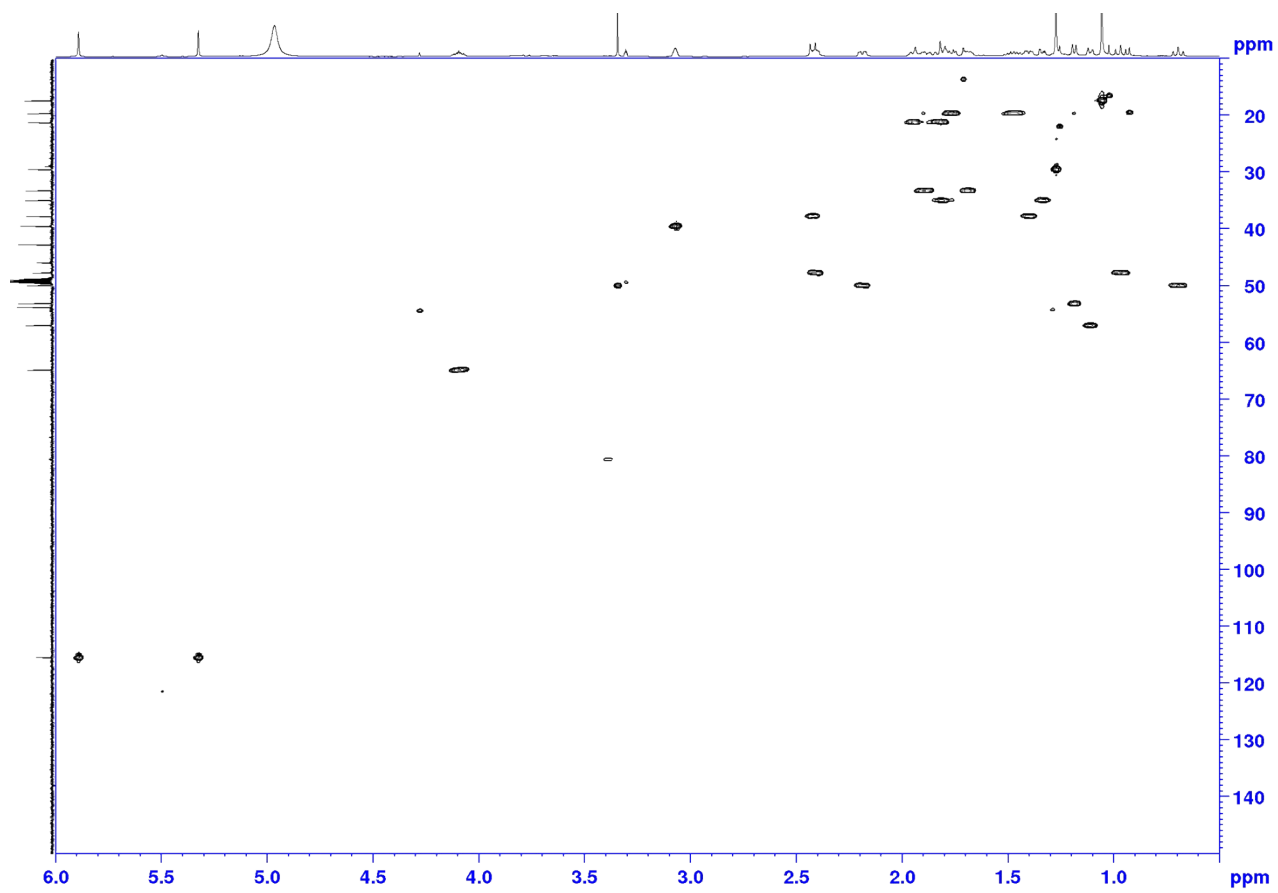

Figure S68. HSQC spectrum of Nouveinsiancin F (6) in CD<sub>3</sub>OD



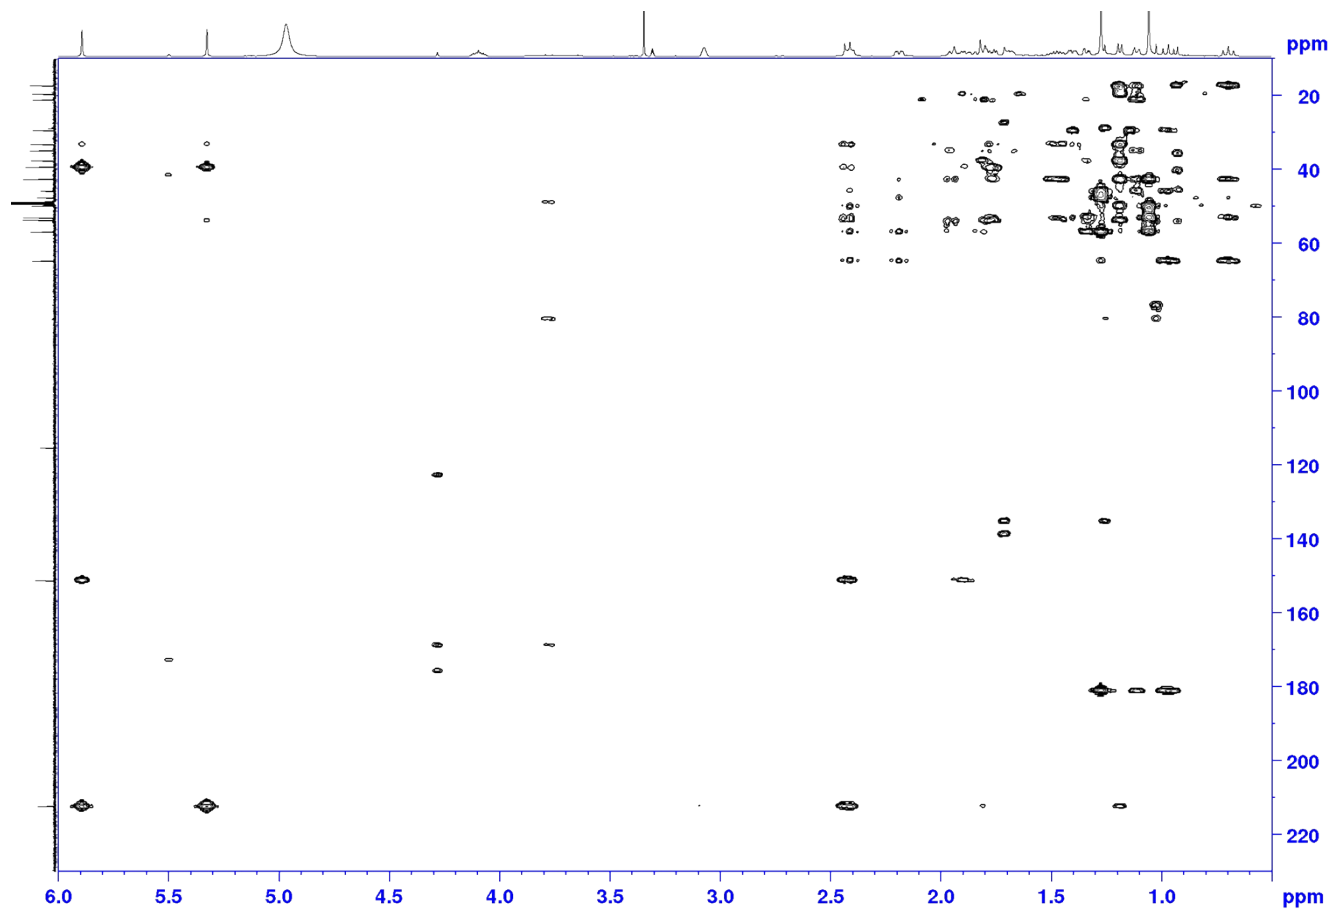

Figure S69. HMBC spectrum of Noueinsiancin F (6) in  $\text{CD}_3\text{OD}$

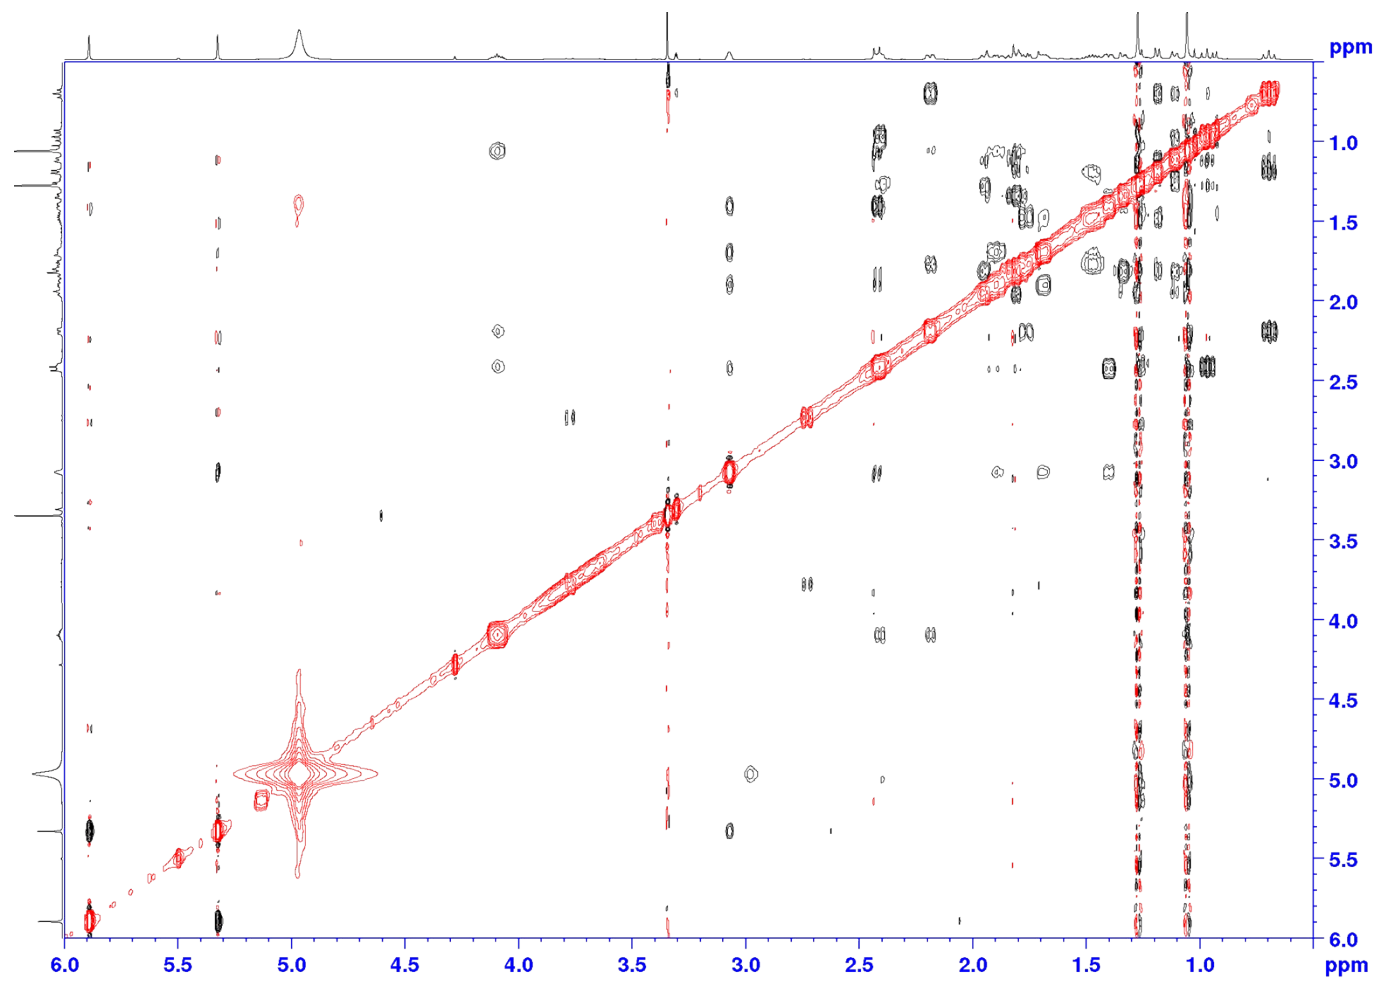

Figure S70. NOESY spectrum of Noueinsiancin F (6) in CD<sub>3</sub>OD

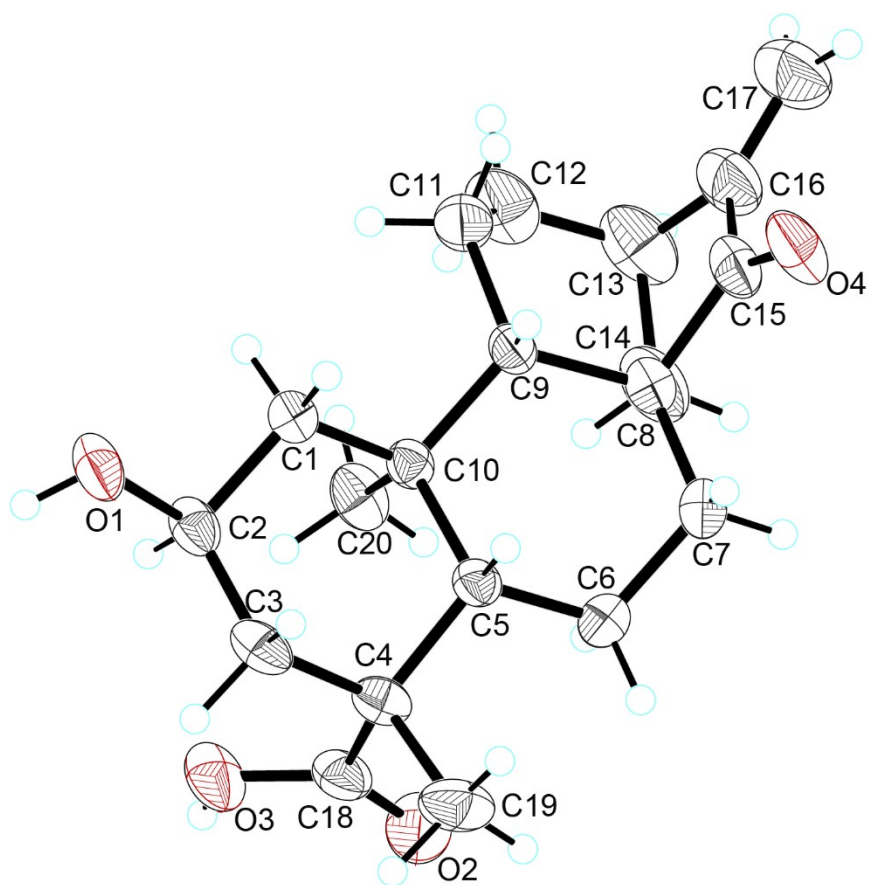

**Figure S71.** X-ray structure of Noueinsiancin F (6)

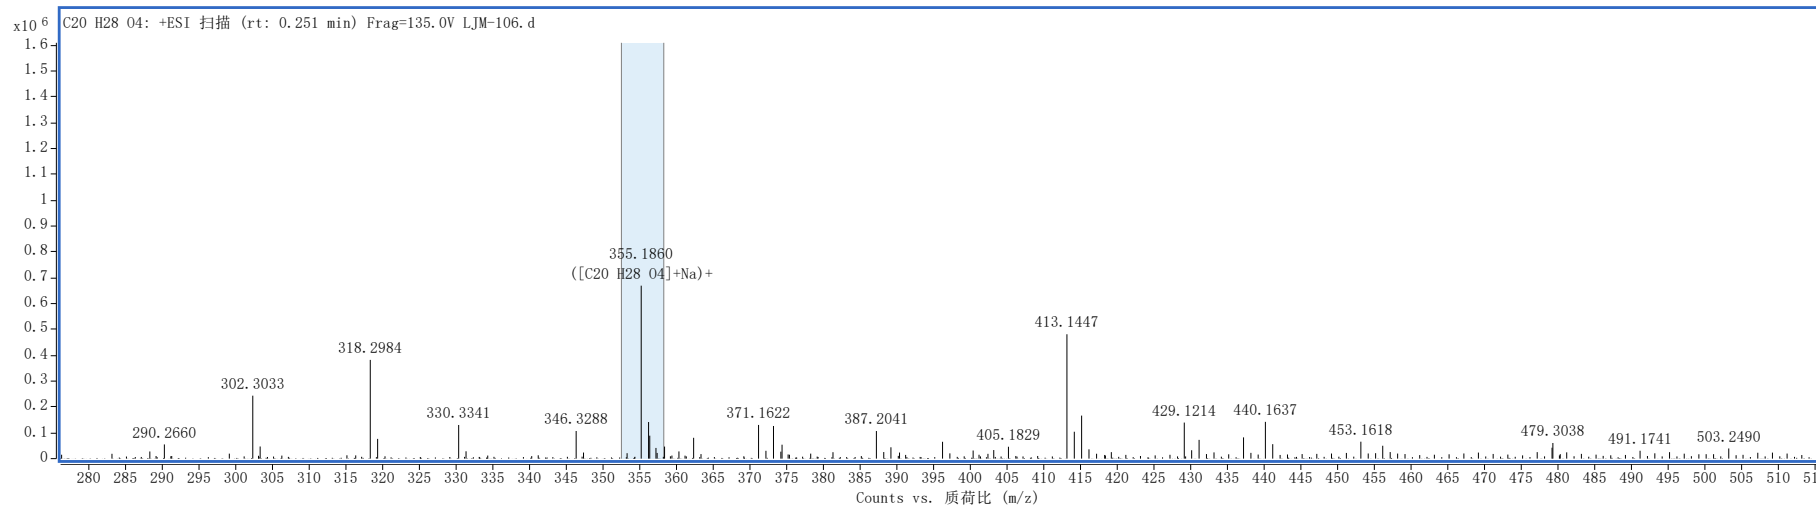

| 最佳   | ID 来源 | 分子式        | 种类      | m/z      | 分数    | Diff (ppm) | 分数 (MFG) |
|------|-------|------------|---------|----------|-------|------------|----------|
| TRUE | MFG   | C20 H28 O4 | (M+Na)+ | 355.1860 | 85.21 | 6.04       | 85.21    |

| 峰高总百分比 (Calc) | 峰高 (计算值) | 峰高百分数(计算值) | m/z (Calc) | Diff (mDa) | 峰高       | 峰高百分数 | 峰高总百分比 | m/z     | Diff (ppm) |
|---------------|----------|------------|------------|------------|----------|-------|--------|---------|------------|
| 79.8          | 680361.9 | 100        | 355.188    | 2          | 669184.3 | 100   | 78.5   | 355.186 | 5.63       |

Figure S72. HRESIMS spectrum of Noueinsiancin G (7)

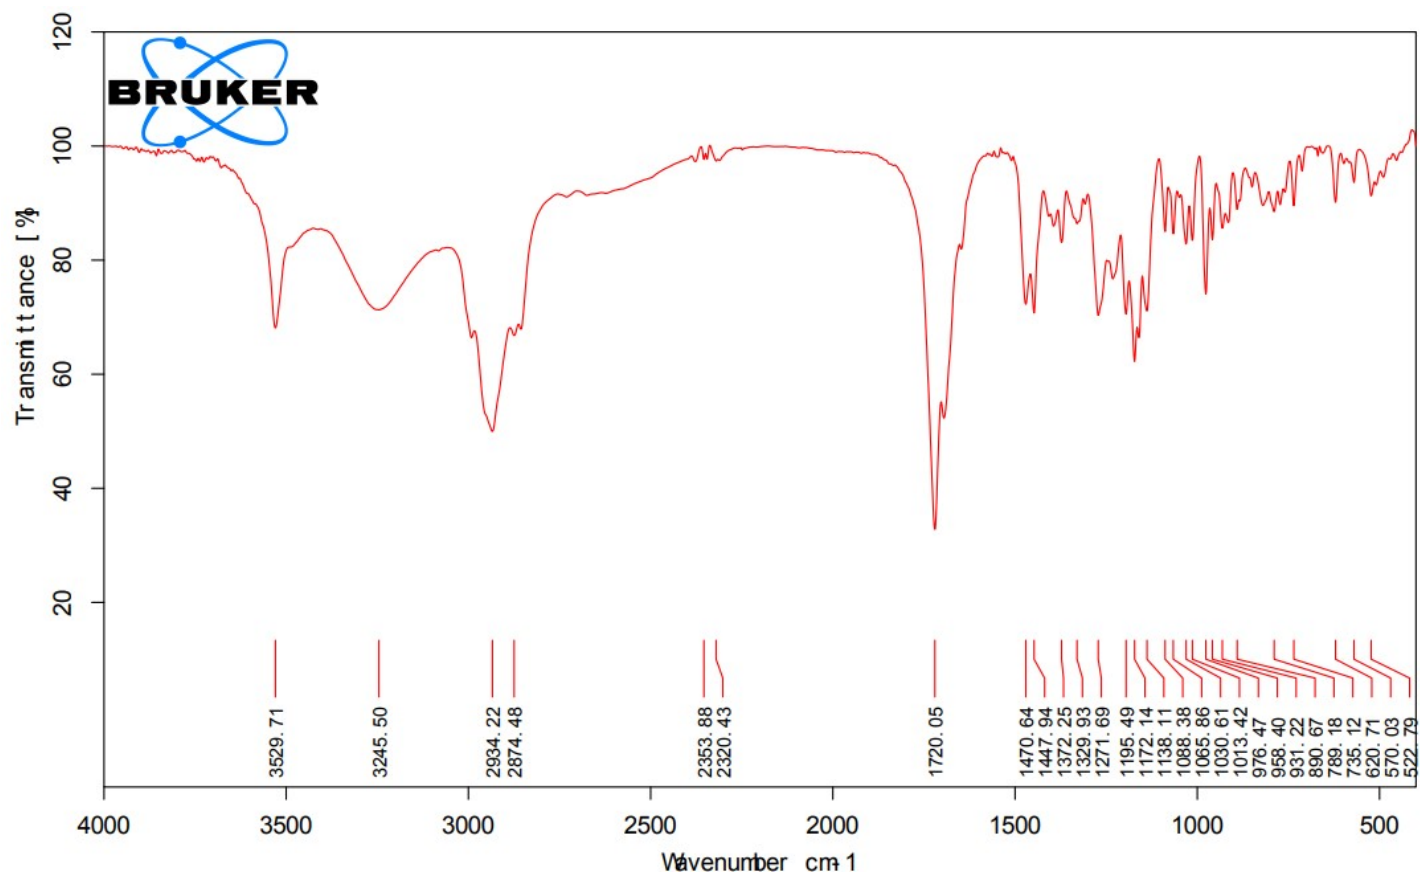

Figure S73. IR spectrum of Nouveinsiancin G (7)

**Rudolph Research Analytical**

Thursday, 02/10/2022

This sample was measured on an Autopol VI, serial number 90079,  
manufactured by Rudolph Research Analytical, Hackettstown, NJ.

LotID : LJM-106  
Set Temperature : 20.0  
Temp Corr : OFF

| <b>n</b>    | <b>Average</b>   | <b>Std.Dev.</b> | <b>Maximum</b> | <b>Minimum</b> |                |            |              |              |              |                |
|-------------|------------------|-----------------|----------------|----------------|----------------|------------|--------------|--------------|--------------|----------------|
| 6           | -139.333         | 0.0000          | -139.333       | -139.333       |                |            |              |              |              |                |
| <b>S.No</b> | <b>Sample ID</b> | <b>Time</b>     | <b>Result</b>  | <b>Scale</b>   | <b>OR °Arc</b> | <b>WLG</b> | <b>Lg.mm</b> | <b>Conc.</b> | <b>Temp.</b> | <b>Comment</b> |
| 1           | LJM-106          | 07:46:08 PM     | -139.333       | SR             | -0.209         | 589        | 100.00       | 0.150        | 20.1         |                |
| 2           | LJM-106          | 07:46:13 PM     | -139.333       | SR             | -0.209         | 589        | 100.00       | 0.150        | 20.1         |                |
| 3           | LJM-106          | 07:46:19 PM     | -139.333       | SR             | -0.209         | 589        | 100.00       | 0.150        | 20.1         |                |
| 4           | LJM-106          | 07:46:25 PM     | -139.333       | SR             | -0.209         | 589        | 100.00       | 0.150        | 20.1         |                |
| 5           | LJM-106          | 07:46:30 PM     | -139.333       | SR             | -0.209         | 589        | 100.00       | 0.150        | 20.0         |                |
| 6           | LJM-106          | 07:46:36 PM     | -139.333       | SR             | -0.209         | 589        | 100.00       | 0.150        | 20.0         |                |

\_\_\_\_\_  
Signature

**Figure S74. OR Value of Noueinsiancin G (7) in CH<sub>3</sub>OH**

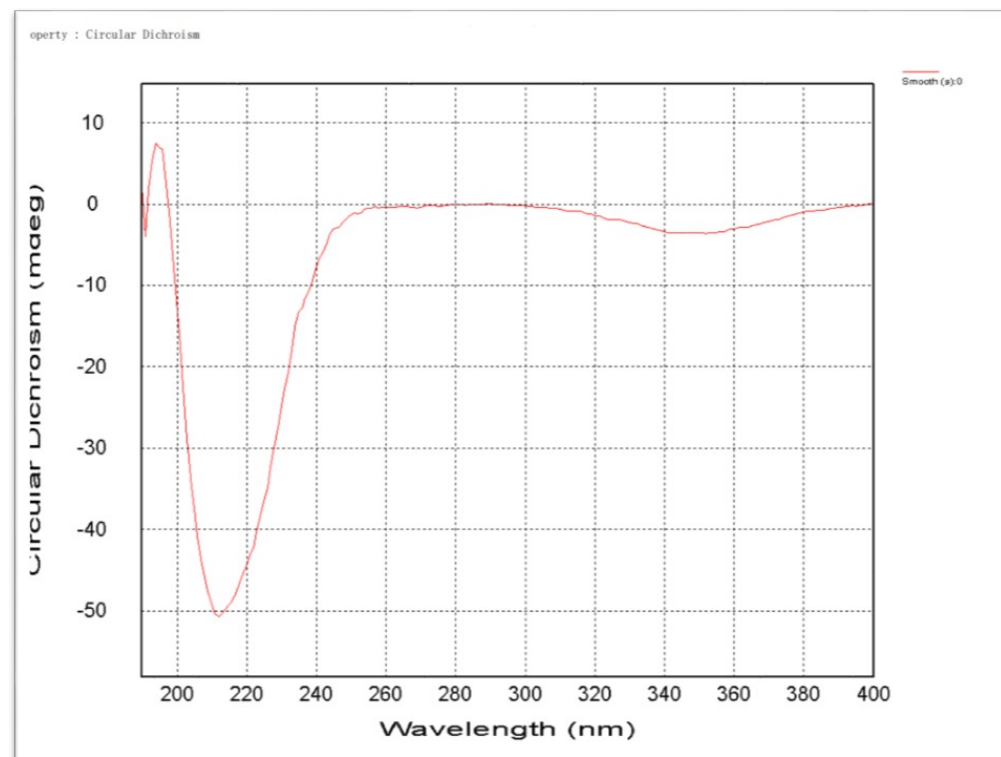

Figure S75. CD Value of Noueinsiancin G (7) in CH<sub>3</sub>OH

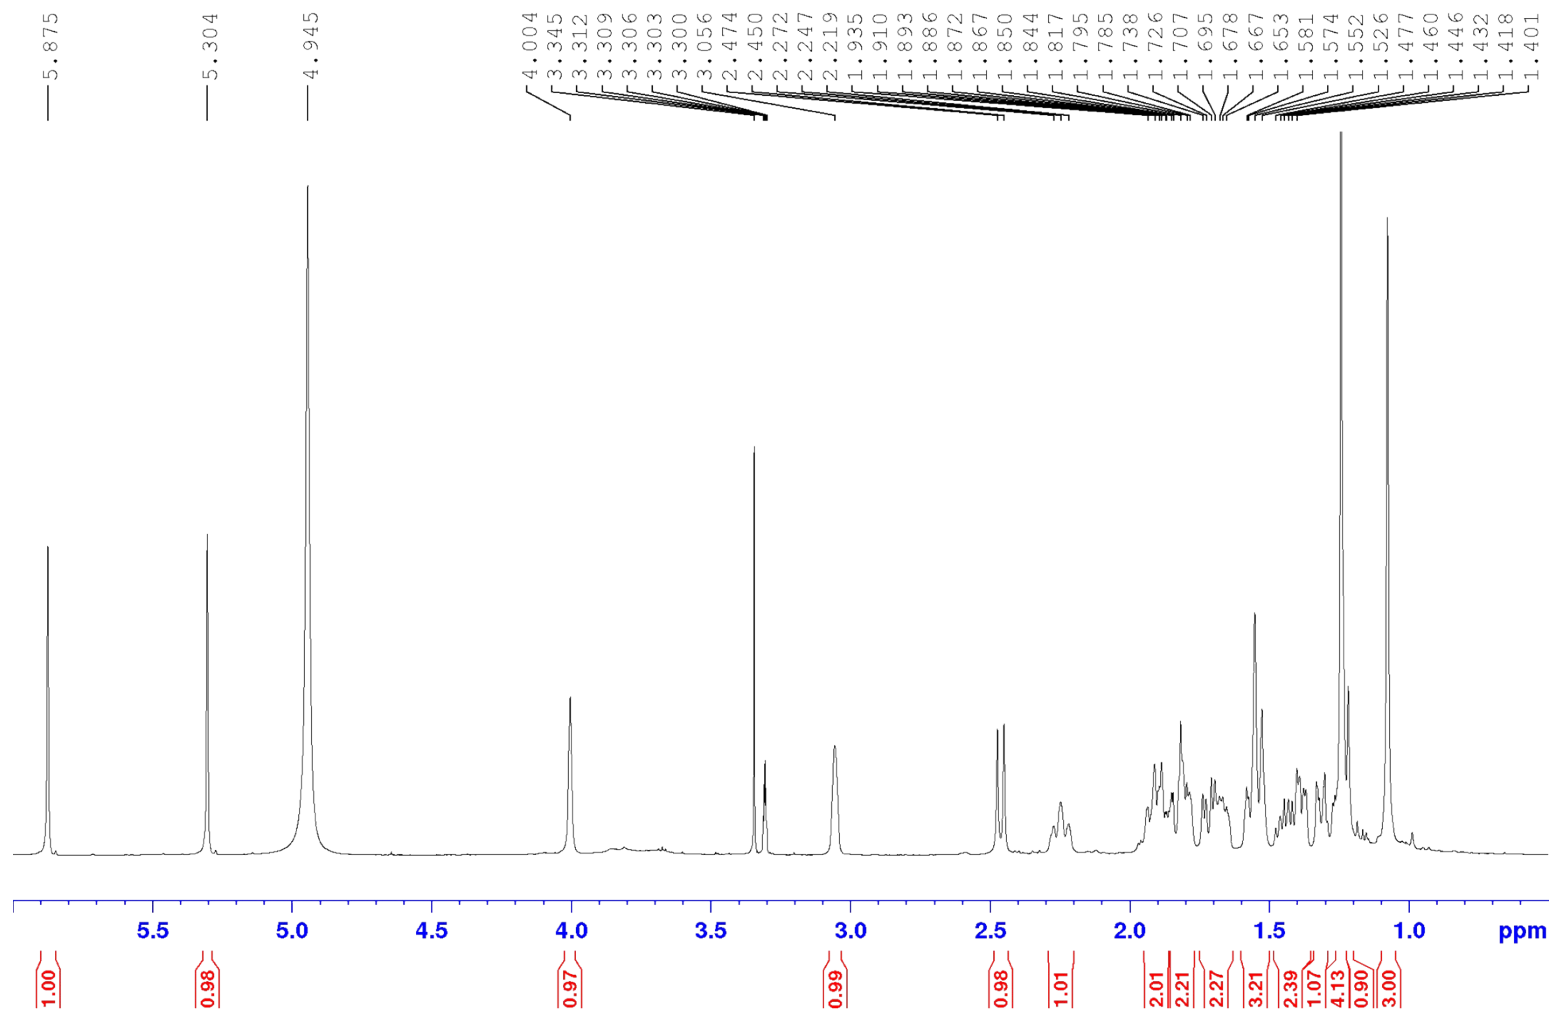

Figure S76. <sup>1</sup>H NMR spectrum of Noueinsiancin G (7) in CD<sub>3</sub>OD



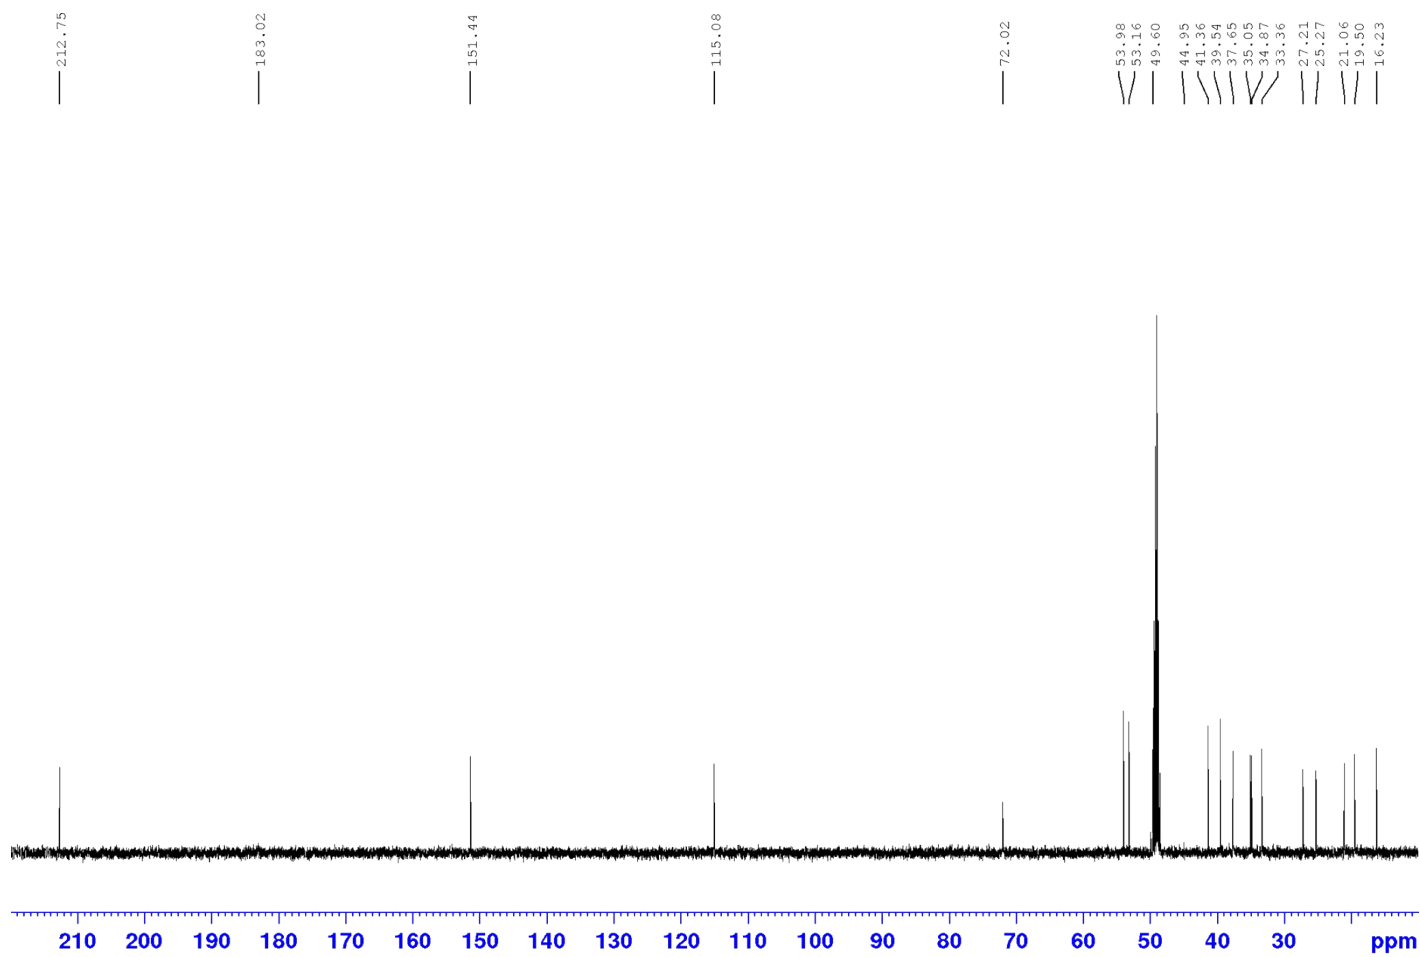

Figure S77  $^{13}\text{C}$  NMR spectrum of Noueinsiancin G (7) in  $\text{CD}_3\text{OD}$

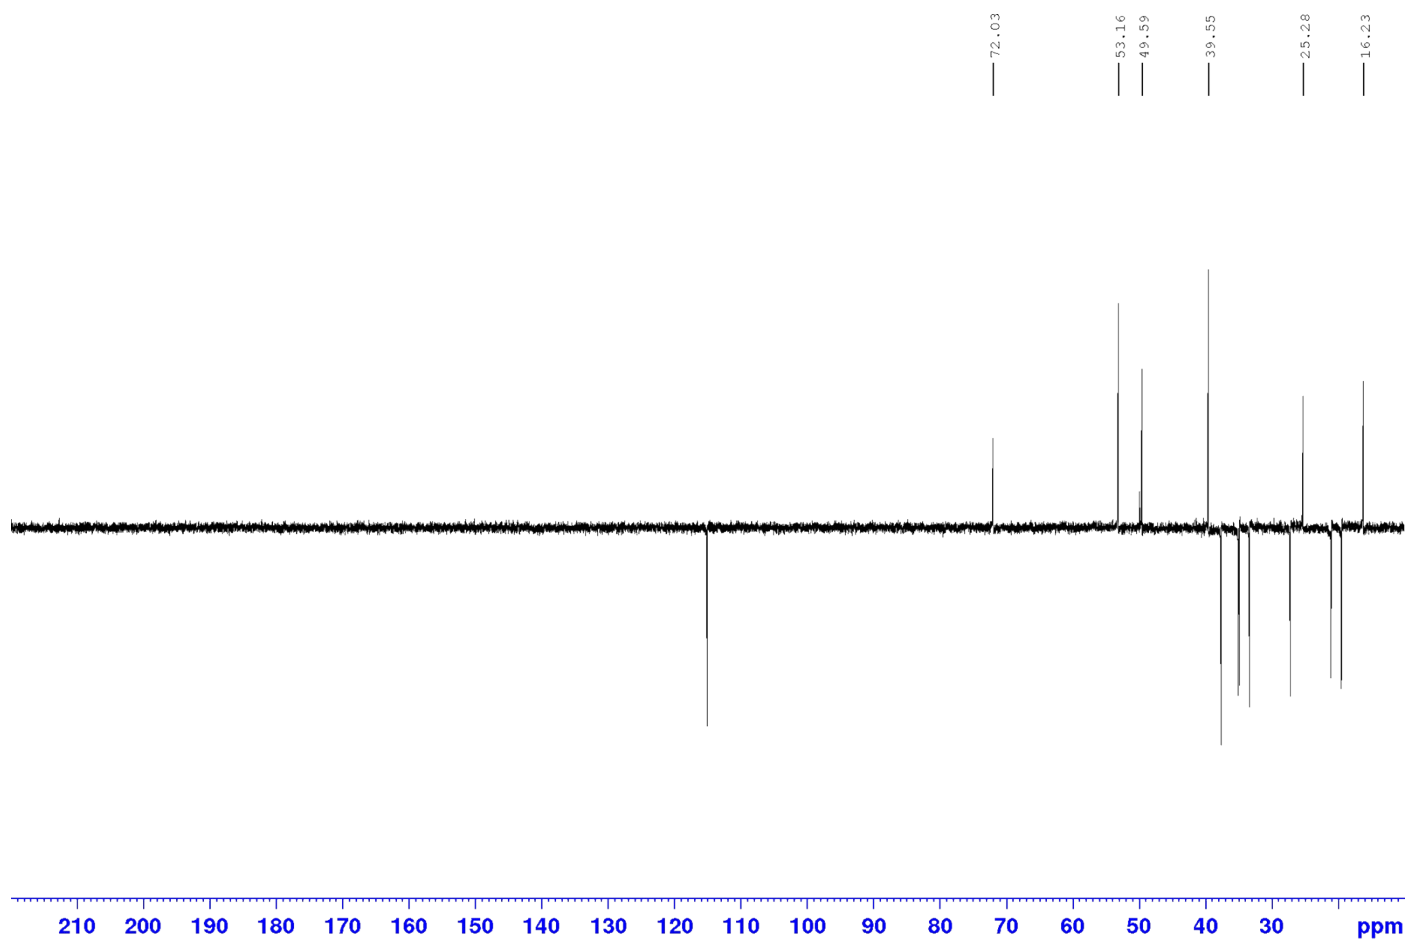

Figure S78. DEPT-135 NMR spectrum of Noueinsiancin G (7) in CD<sub>3</sub>OD

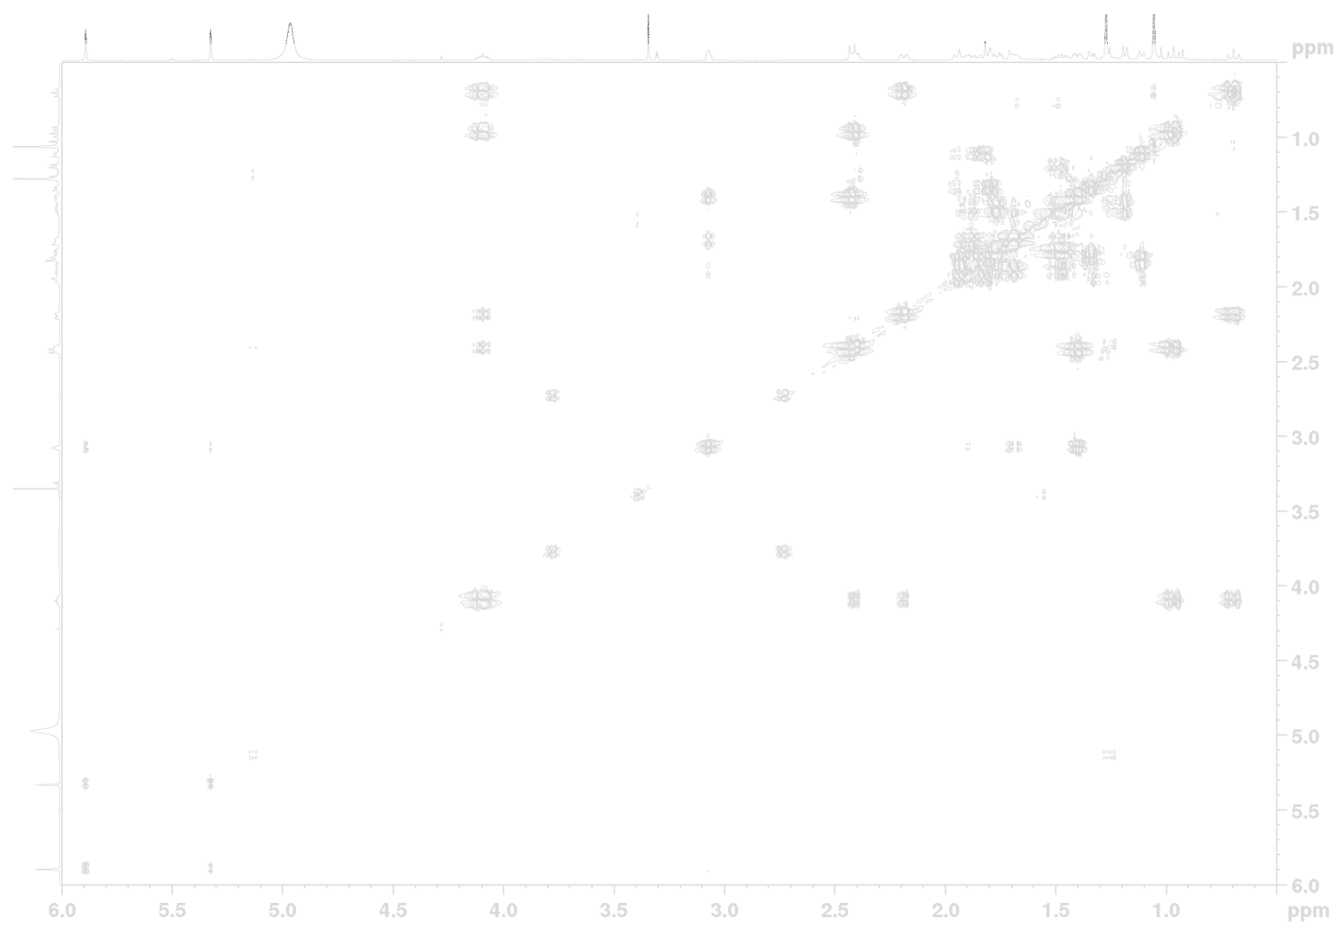

Figure S79.  $^1\text{H}$ - $^1\text{H}$  COSY spectrum of Nouveinsiancin G (7) in  $\text{CD}_3\text{OD}$

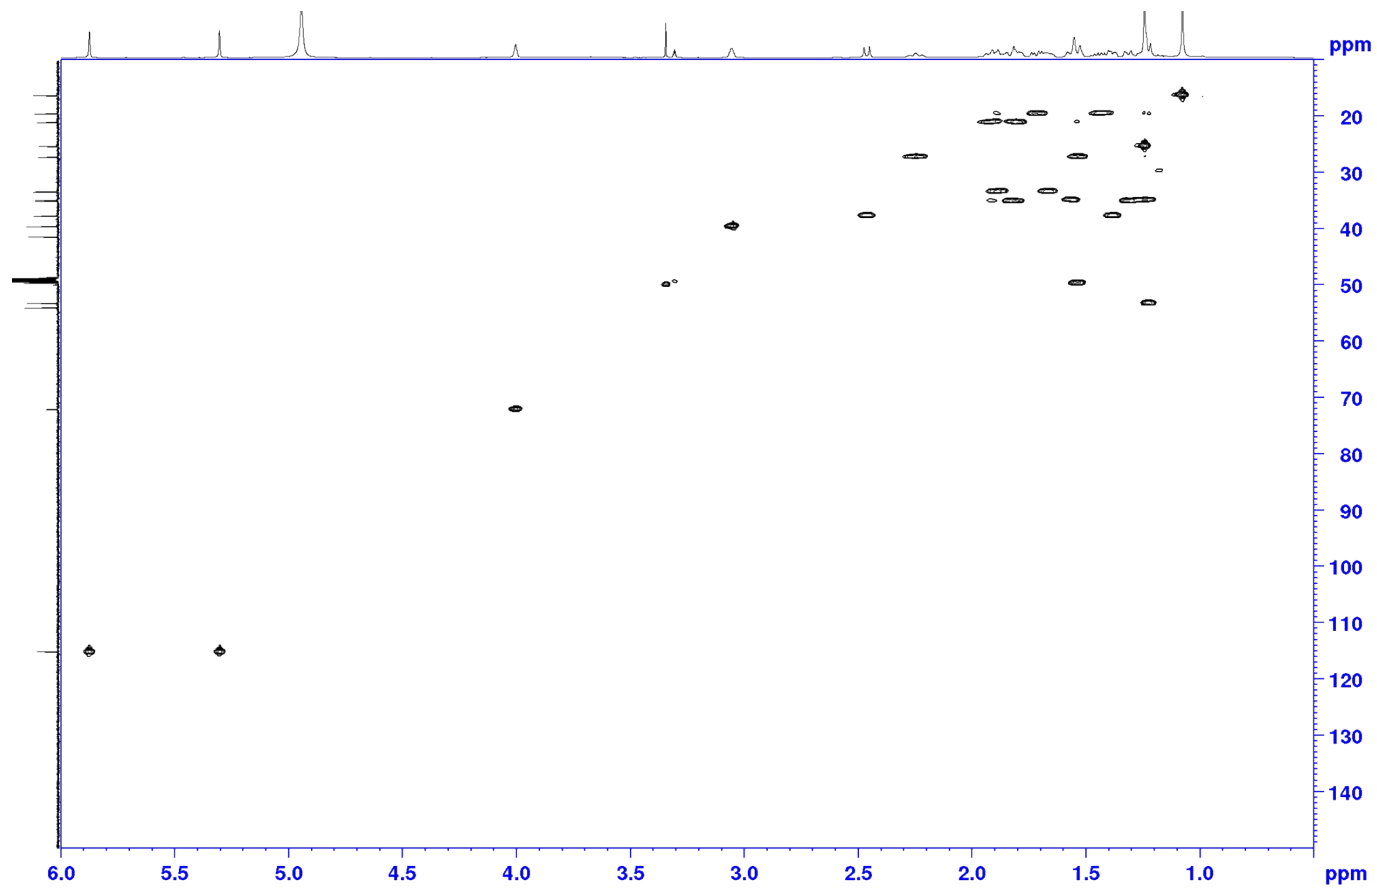

Figure S80. HSQC spectrum of Noueinsiancin G (7) in CD<sub>3</sub>OD

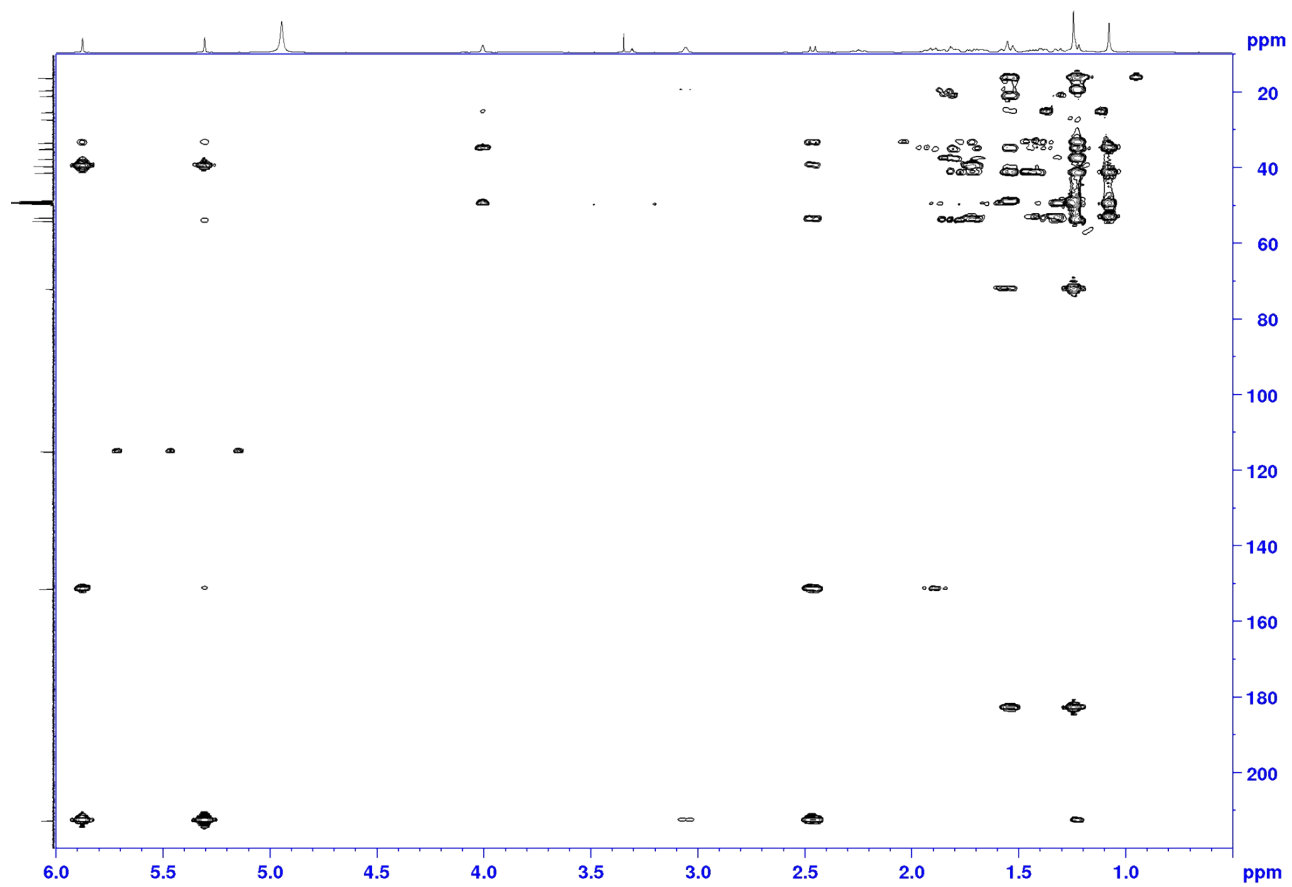

Figure S81. HMBC spectrum of Noueinsiancin G (7) in CD<sub>3</sub>OD

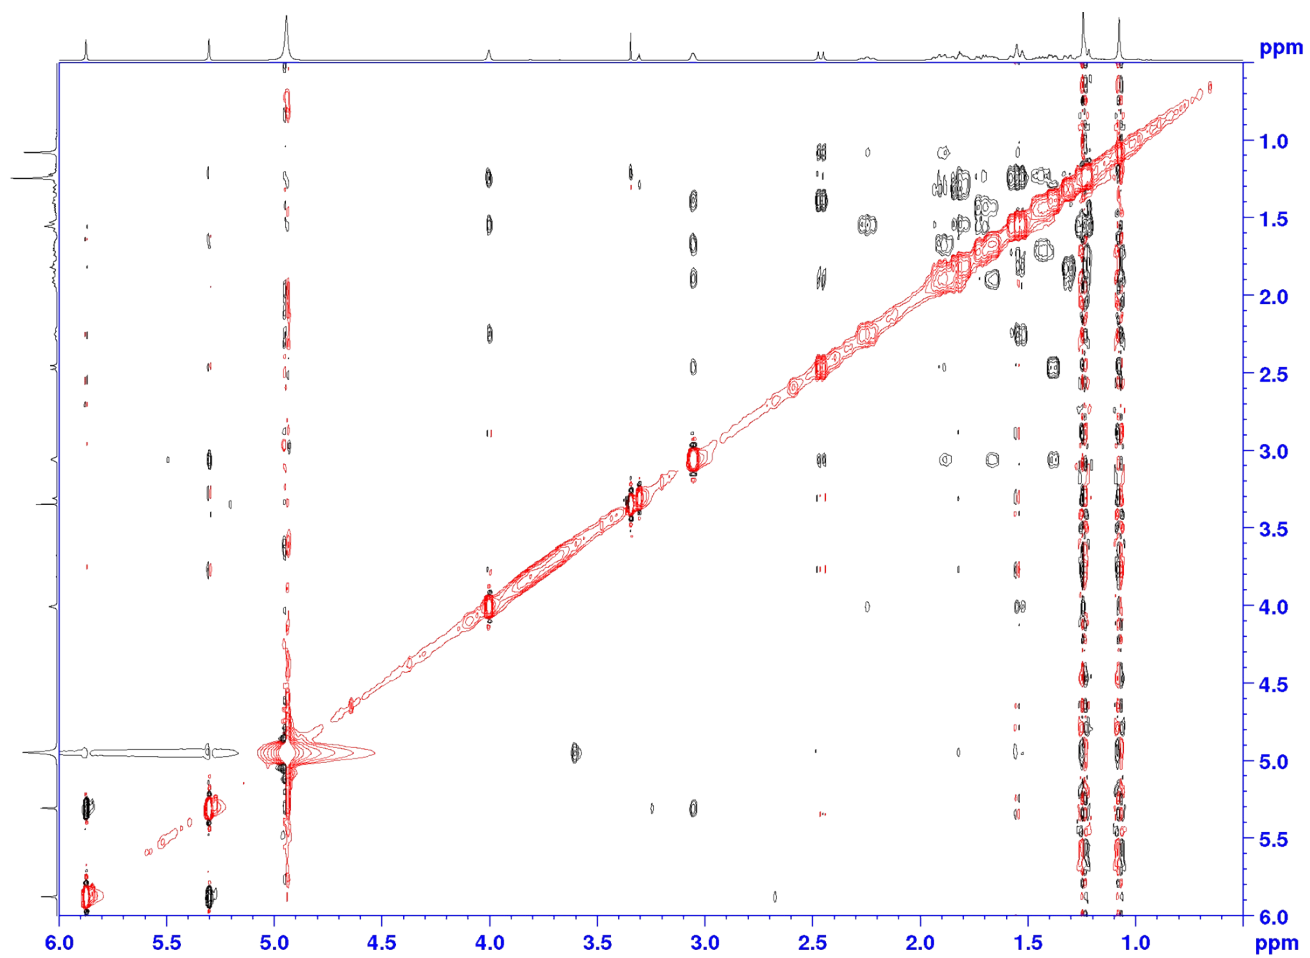

Figure S82. NOESY spectrum of Noueinsiancin G (7) in CD<sub>3</sub>OD

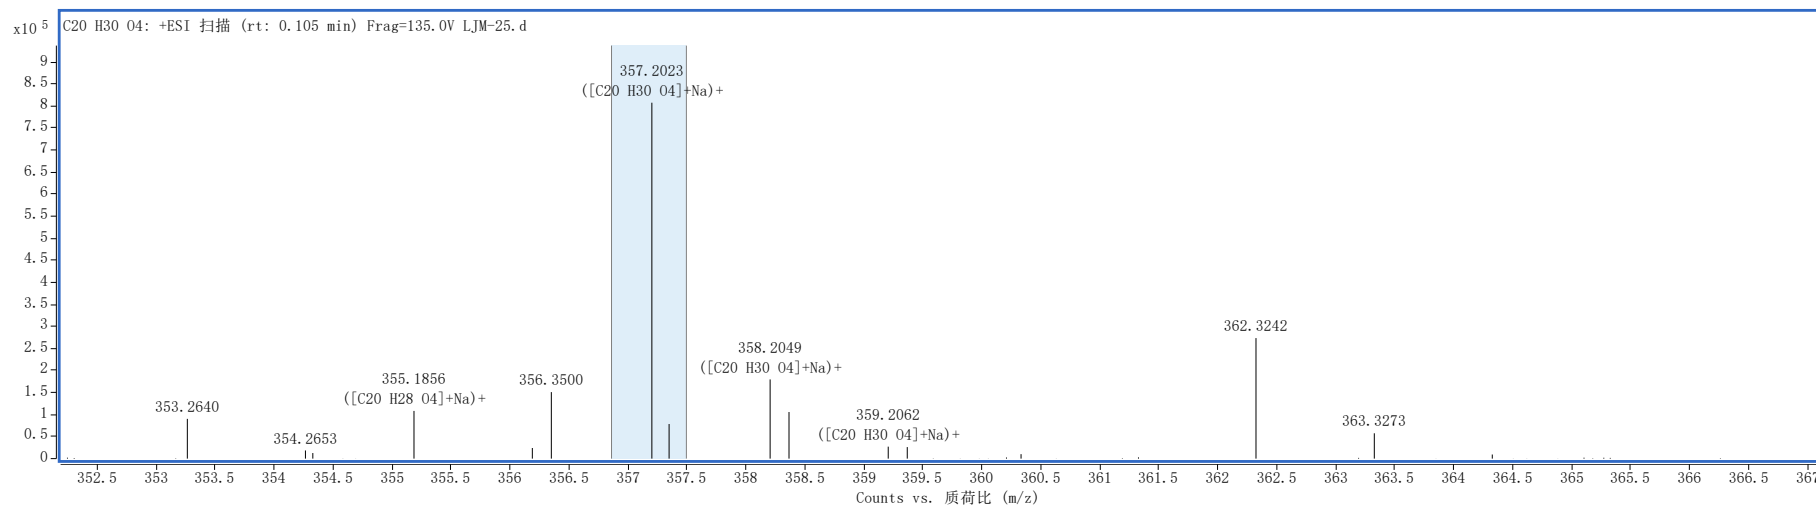

| 最佳   | ID 来源 | 分子式        | 种类      | m/z      | 分数    | Diff (ppm) | 分数 (MFG) |
|------|-------|------------|---------|----------|-------|------------|----------|
| TRUE | MFG   | C20 H30 O4 | (M+Na)+ | 357.2023 | 92.42 | 4.59       | 92.42    |

| 峰高总百分比 (Calc) | 峰高 (计算值) | 峰高百分数 (计算值) | m/z (Calc) | Diff (mDa) | 峰高       | 峰高百分数 | 峰高总百分比 | m/z      | Diff (ppm) |
|---------------|----------|-------------|------------|------------|----------|-------|--------|----------|------------|
| 79.8          | 809437.4 | 100         | 357.2036   | 1.3        | 807306.1 | 100   | 79.6   | 357.2023 | 3.75       |

Figure S83. HRESIMS spectrum of Noueinsiancin H (8)

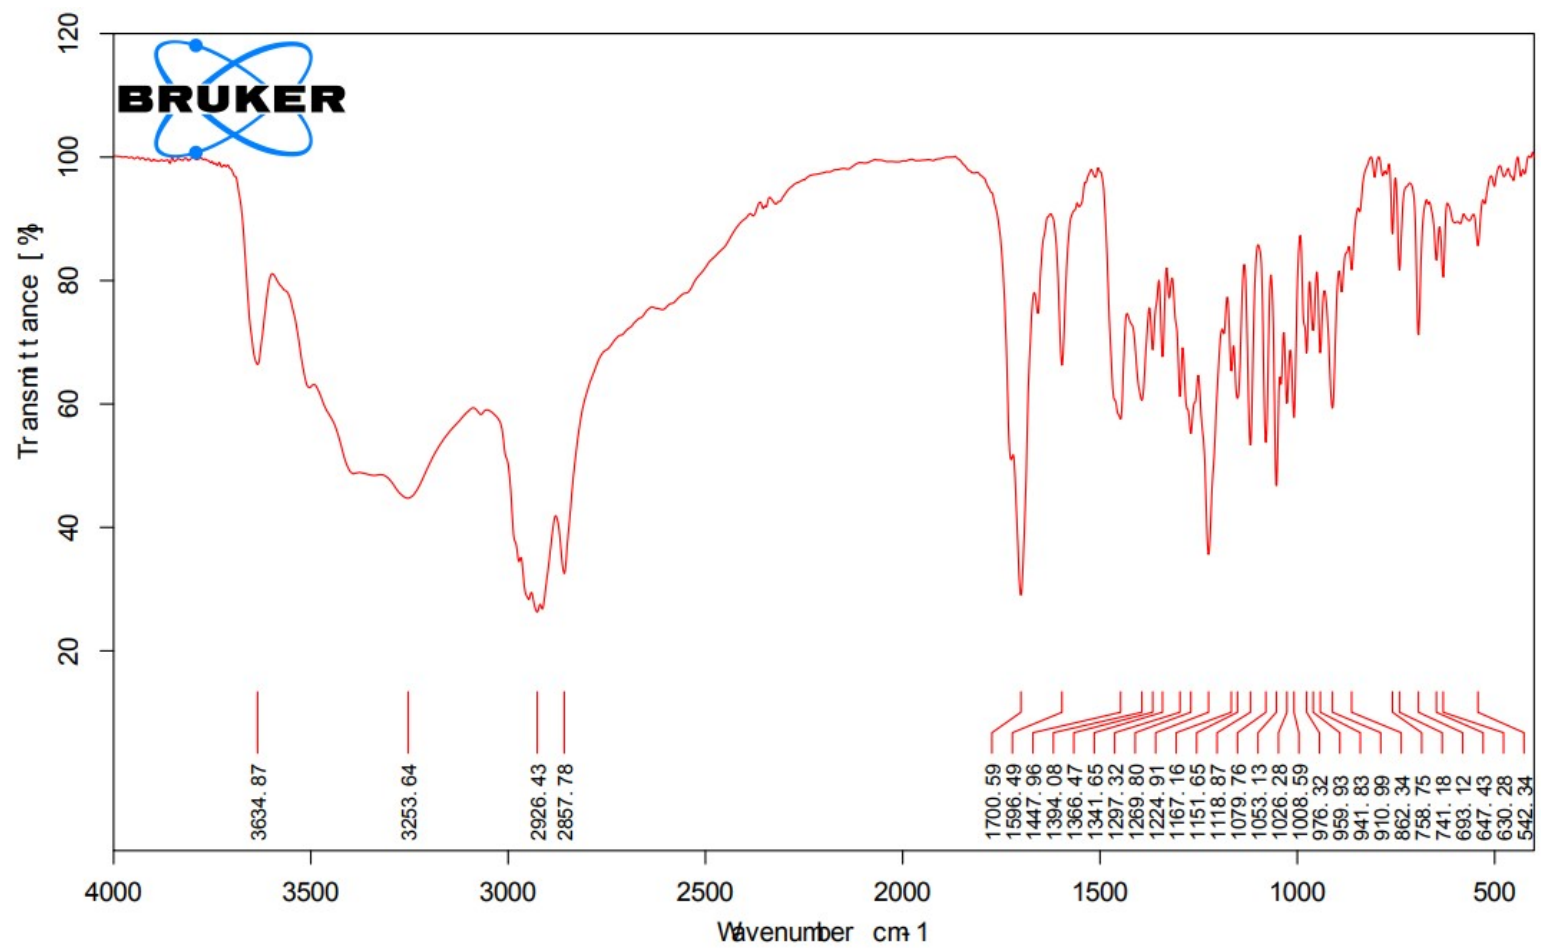

Figure S84. IR spectrum of Nouveinsiancin H (8)



**Rudolph Research Analytical**

Wednesday, 02/09/2022

This sample was measured on an Autopol VI, serial number 90079,  
manufactured by Rudolph Research Analytical, Hackettstown, NJ.

LotID : LJM-25  
Set Temperature : 20.0  
Temp Corr : OFF

|          |                |                 |                |                |
|----------|----------------|-----------------|----------------|----------------|
| <b>n</b> | <b>Average</b> | <b>Std.Dev.</b> | <b>Maximum</b> | <b>Minimum</b> |
| 6        | -85.834        | 0.8335          | -85.000        | -86.667        |

| S.No | Sample ID | Time        | Result  | Scale | OR ° Arc | WLG | Lg.mm  | Conc. | Temp. | Comment |
|------|-----------|-------------|---------|-------|----------|-----|--------|-------|-------|---------|
| 1    | LJM-25    | 03:30:51 PM | -85.000 | SR    | -0.051   | 589 | 100.00 | 0.060 | 20.2  |         |
| 2    | LJM-25    | 03:30:57 PM | -86.667 | SR    | -0.052   | 589 | 100.00 | 0.060 | 20.2  |         |
| 3    | LJM-25    | 03:31:03 PM | -86.667 | SR    | -0.052   | 589 | 100.00 | 0.060 | 20.2  |         |
| 4    | LJM-25    | 03:31:11 PM | -86.667 | SR    | -0.052   | 589 | 100.00 | 0.060 | 20.1  |         |
| 5    | LJM-25    | 03:31:17 PM | -85.000 | SR    | -0.051   | 589 | 100.00 | 0.060 | 20.1  |         |
| 6    | LJM-25    | 03:31:23 PM | -85.000 | SR    | -0.051   | 589 | 100.00 | 0.060 | 20.1  |         |

\_\_\_\_\_  
Signature

**Figure S85. OR Value of Noueinsiancin H (8) in CH3OH**

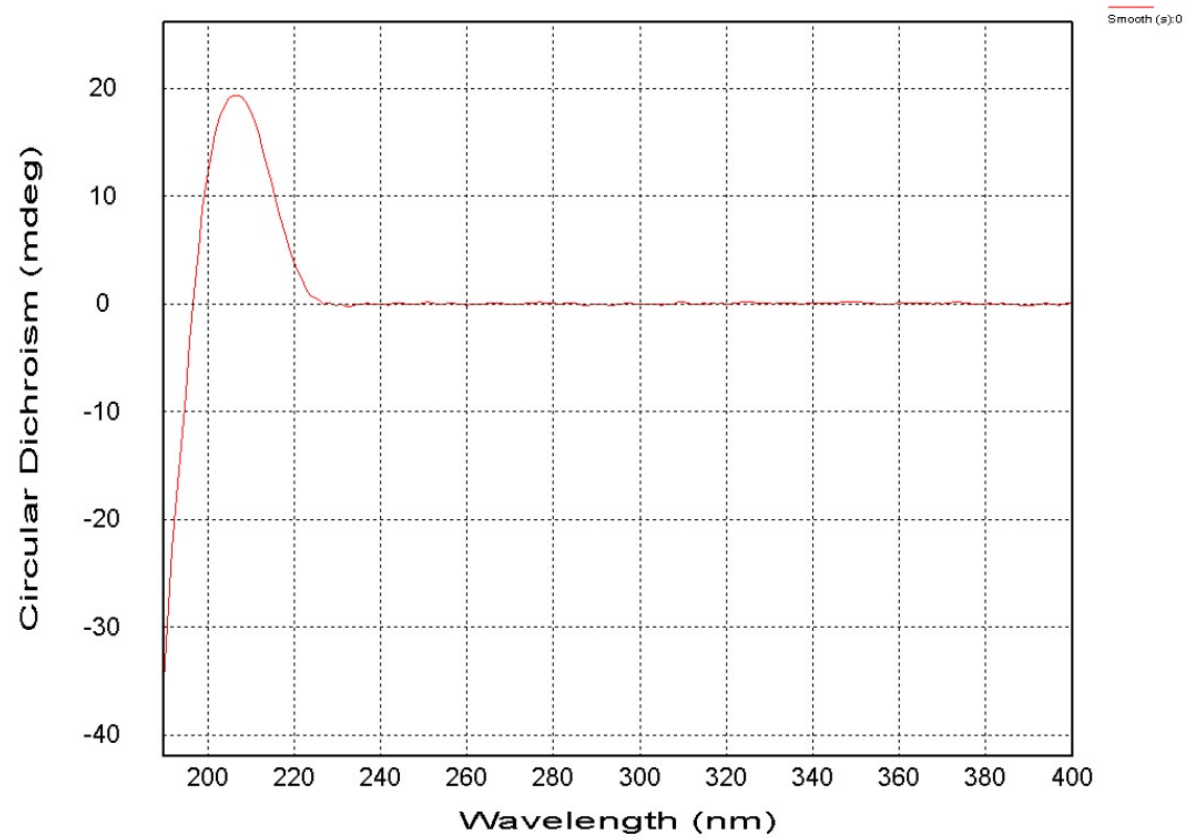

Figure S86. CD Value of Noueinsiancin H (8) in CH<sub>3</sub>OH

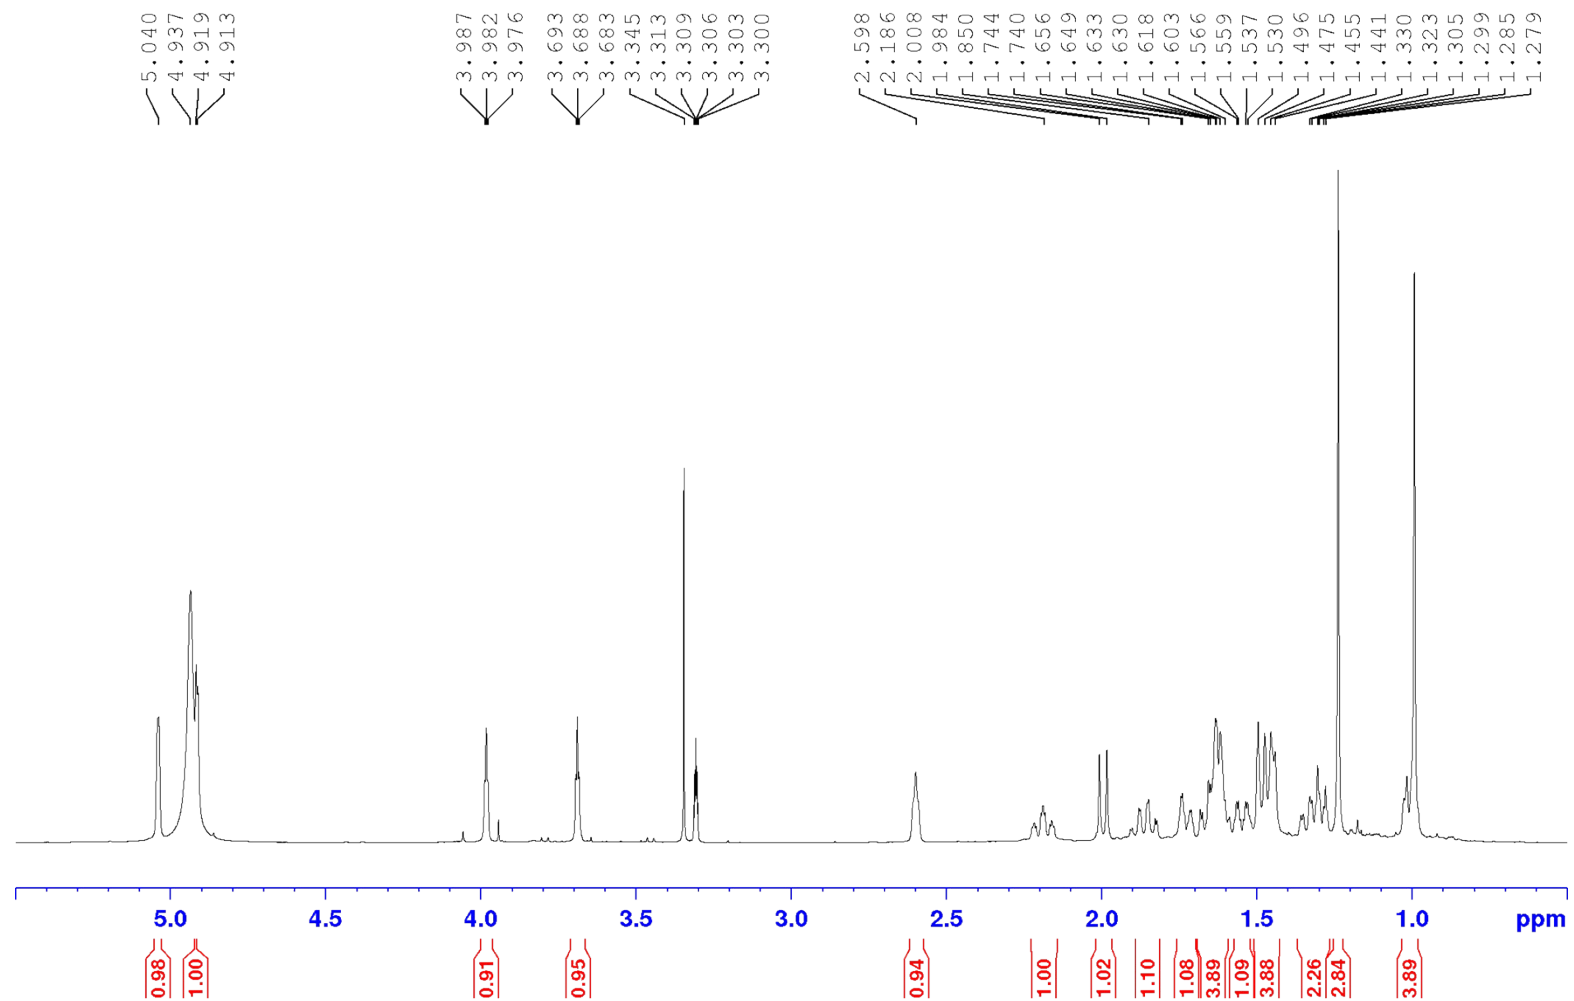

Figure S87. <sup>1</sup>H NMR spectrum of Nouveinsiancin H (8) in CD<sub>3</sub>OD.

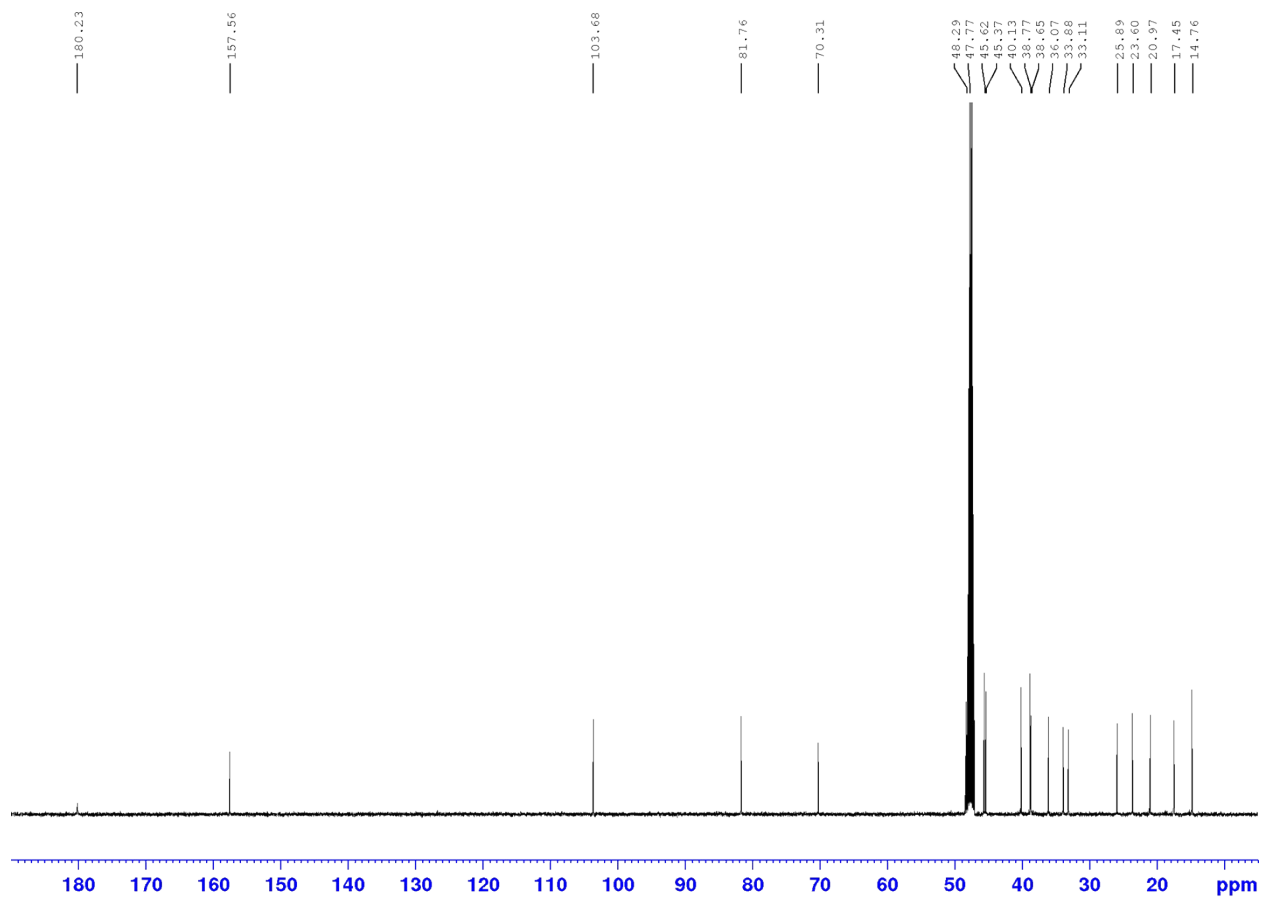

Figure S88.  $^{13}\text{C}$  NMR spectrum of Noueinsiancin H (8) in  $\text{CD}_3\text{OD}$

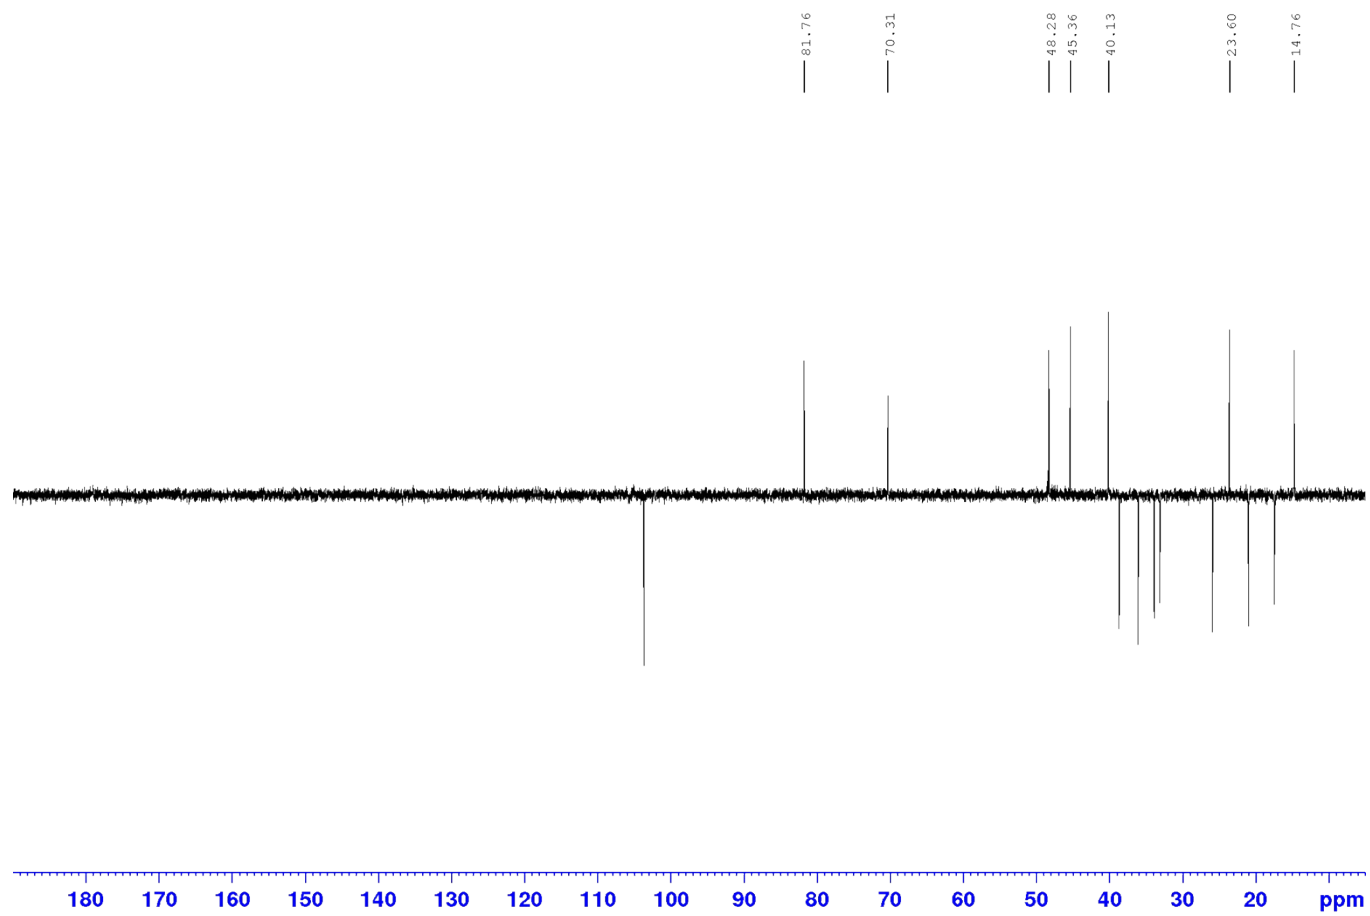

Figure S89. DEPT-135 NMR spectrum of Noueinsiancin H (8) in CD<sub>3</sub>OD

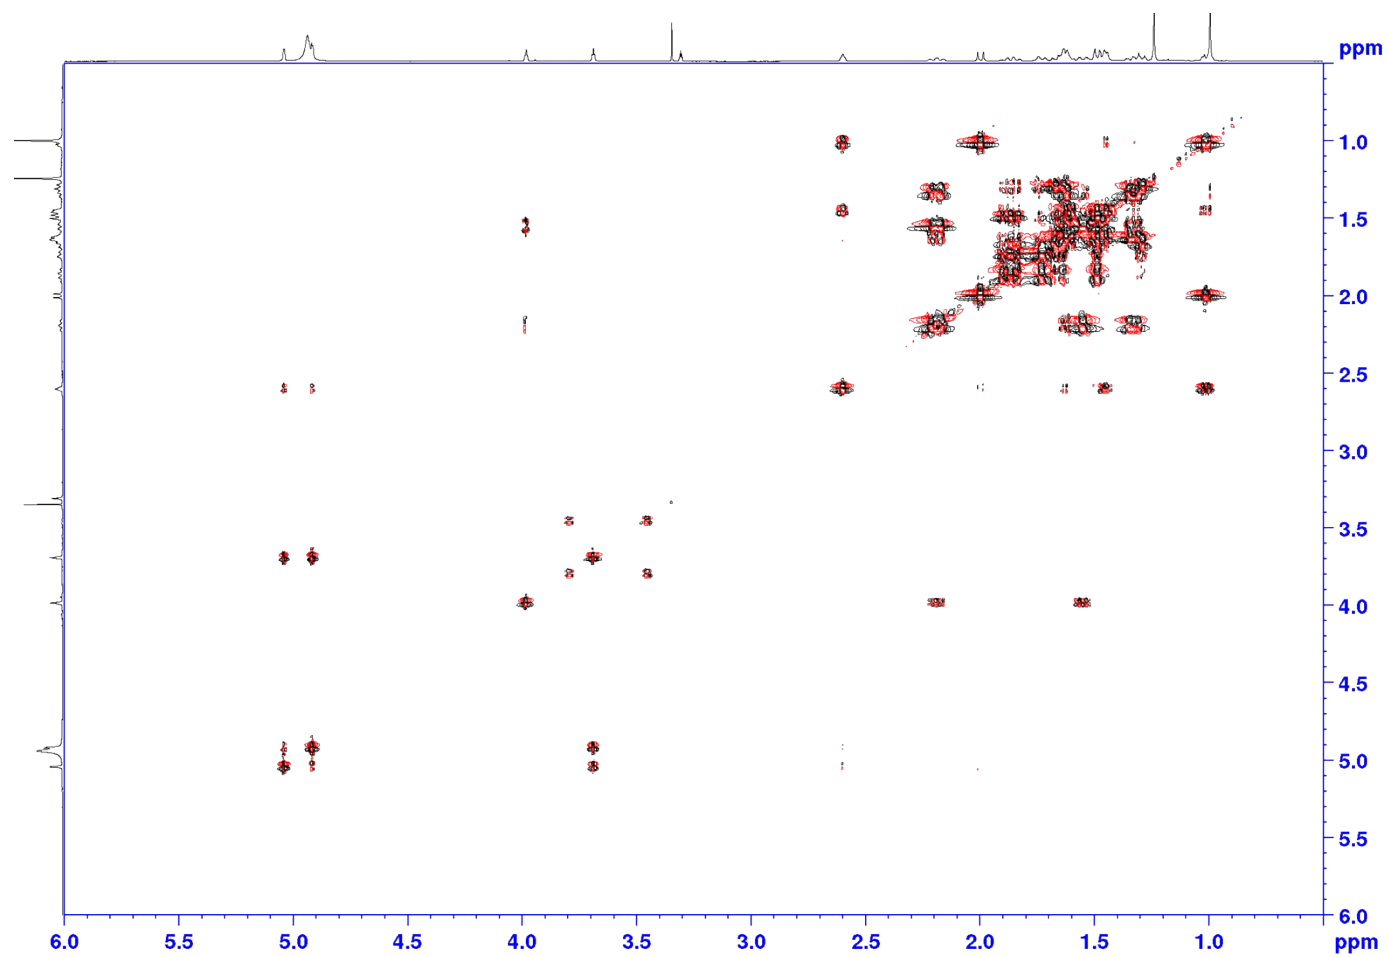

Figure S90.  $^1\text{H}$ - $^1\text{H}$  COSY spectrum of Noueinsiancin H (8) in  $\text{CD}_3\text{OD}$

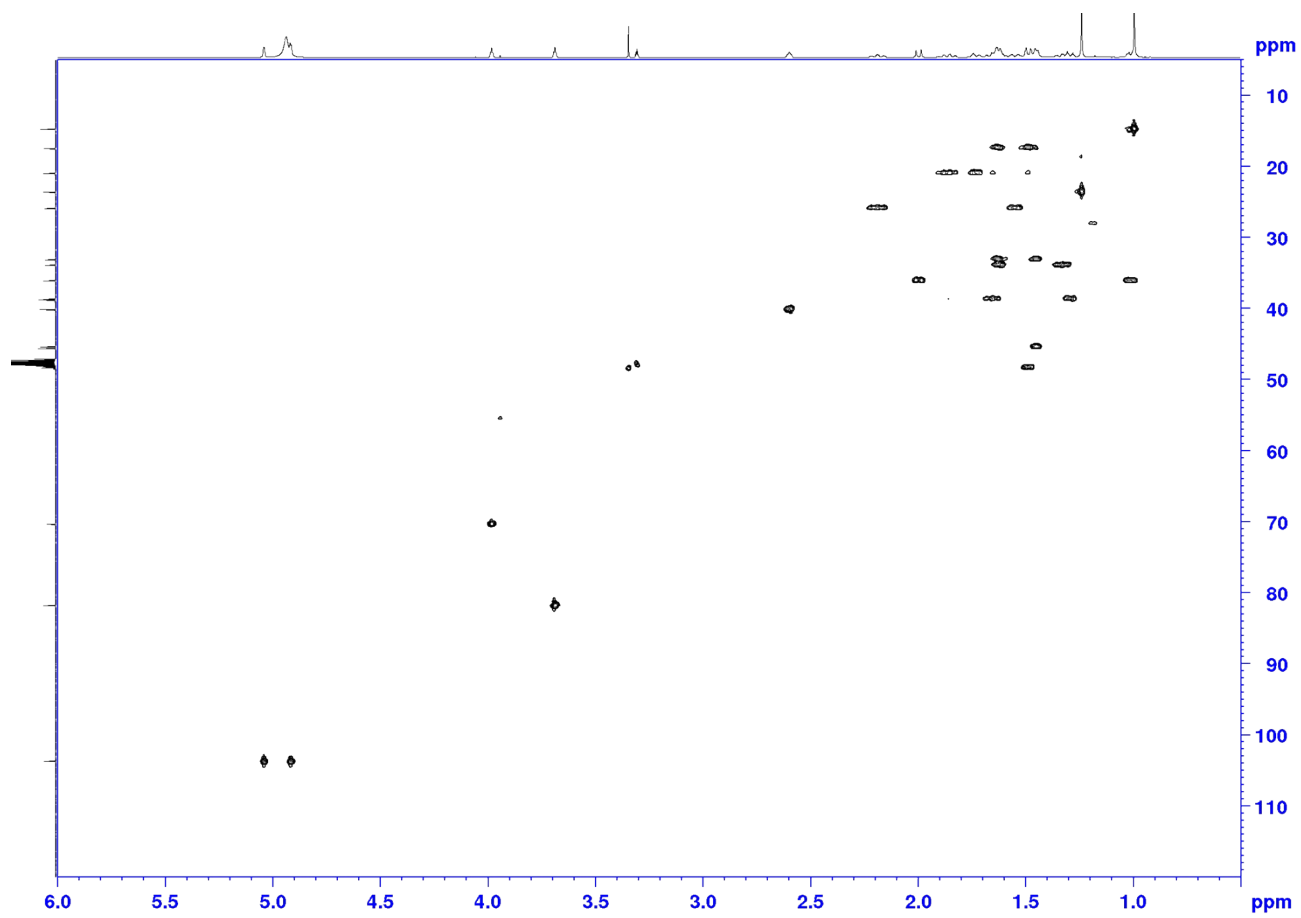

Figure S91. HSQC spectrum of Noueinsiancin H (8) in CD<sub>3</sub>OD

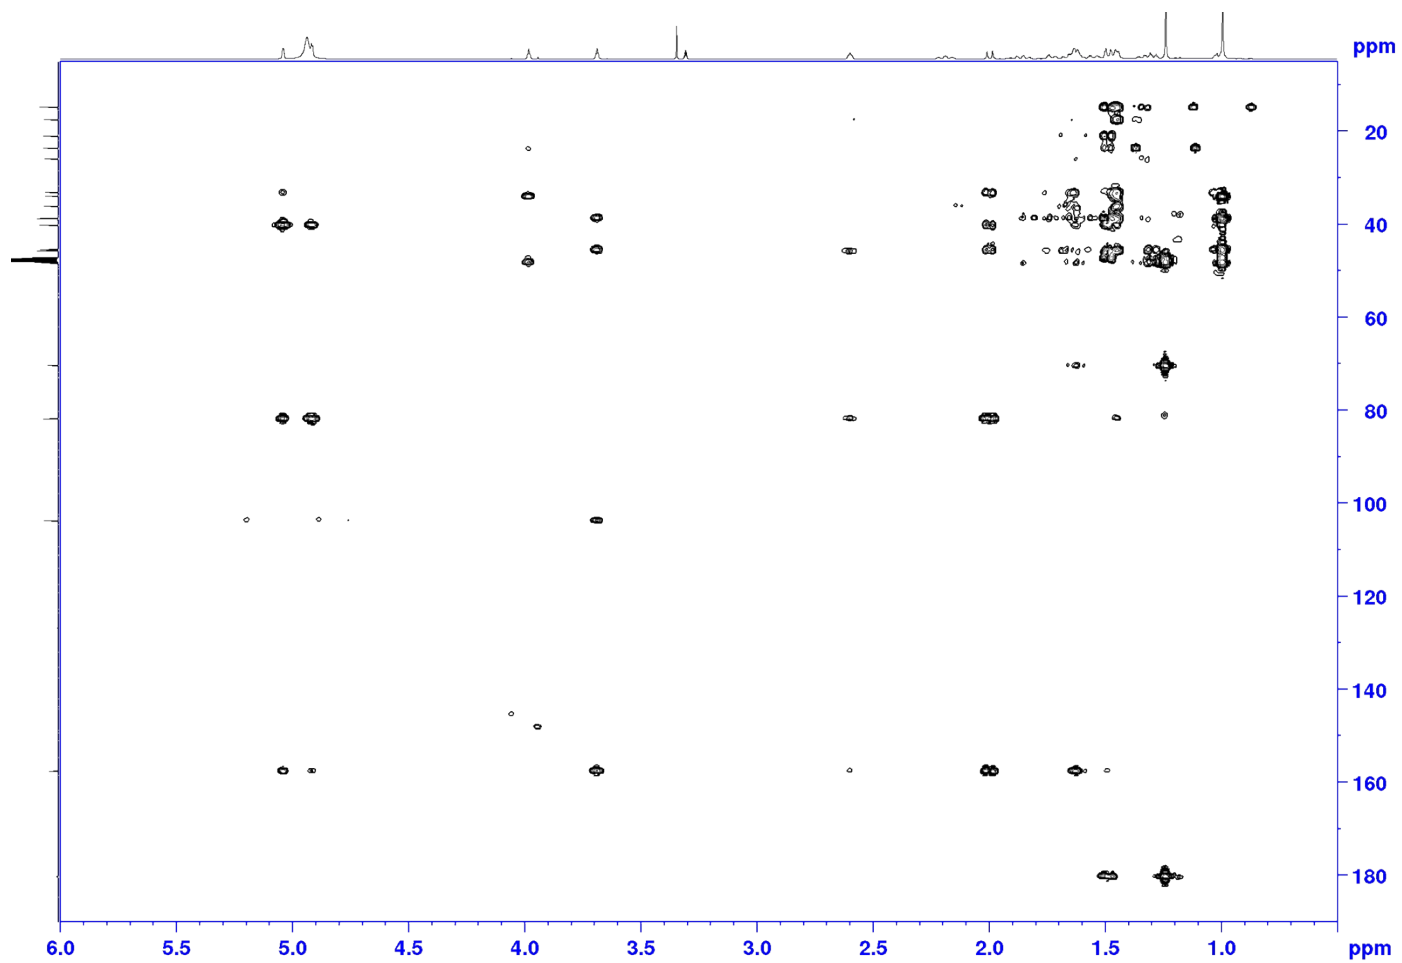

Figure S92. HMBC spectrum of Noueinsiancin H (8) in CD<sub>3</sub>OD



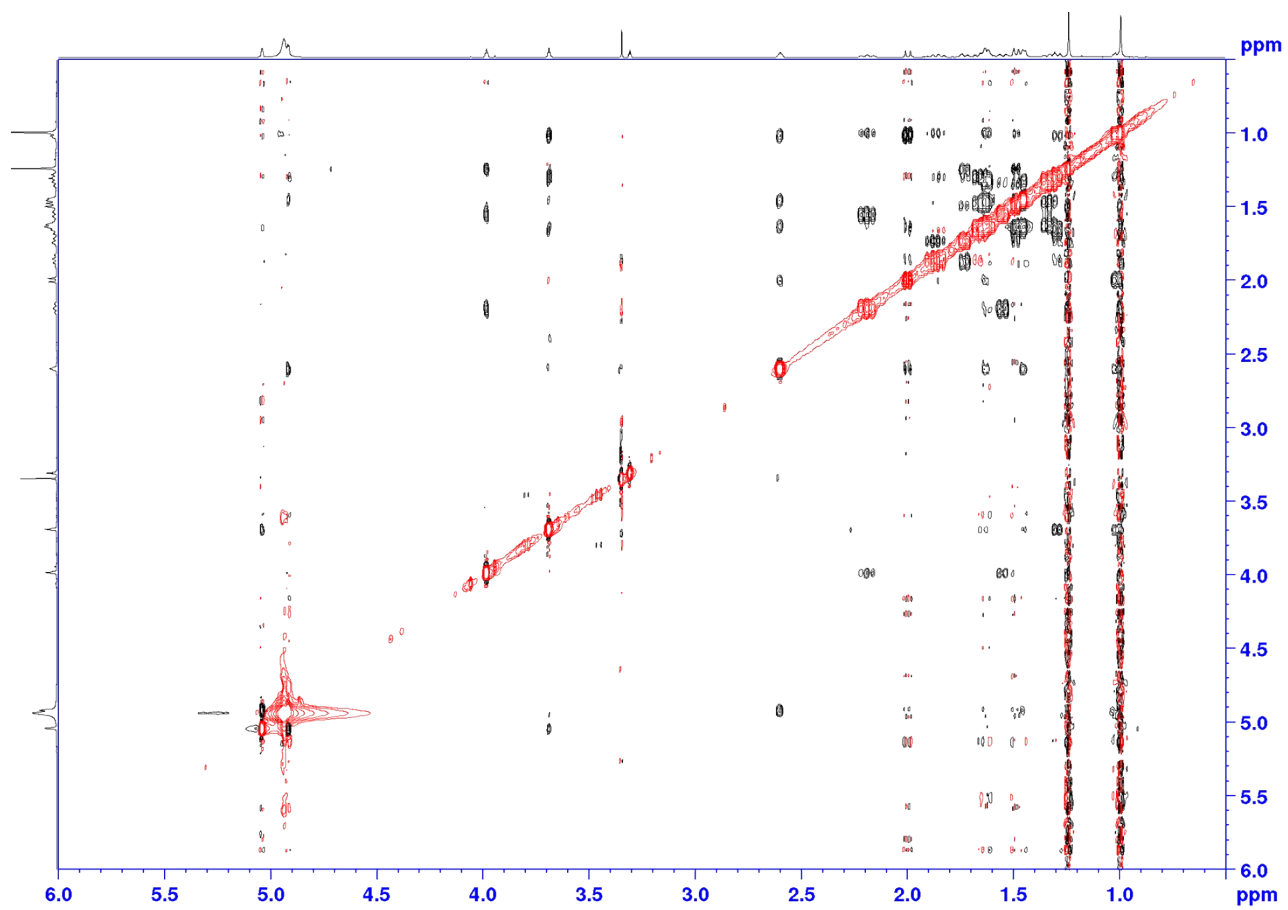

Figure S93. NOESY spectrum of Noueinsiancin H (8) in CD<sub>3</sub>OD

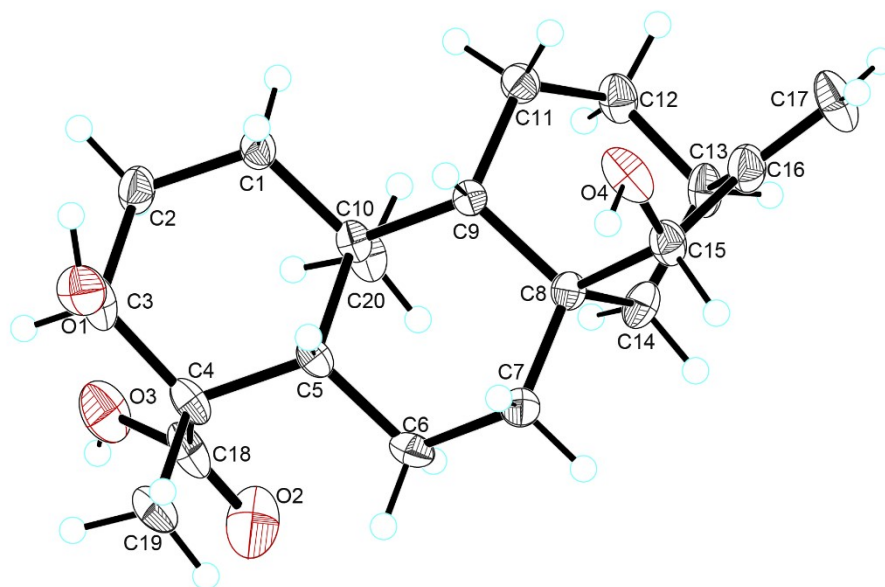

**Figure S94. X-ray structure of Nouveinsiancin H (8)**

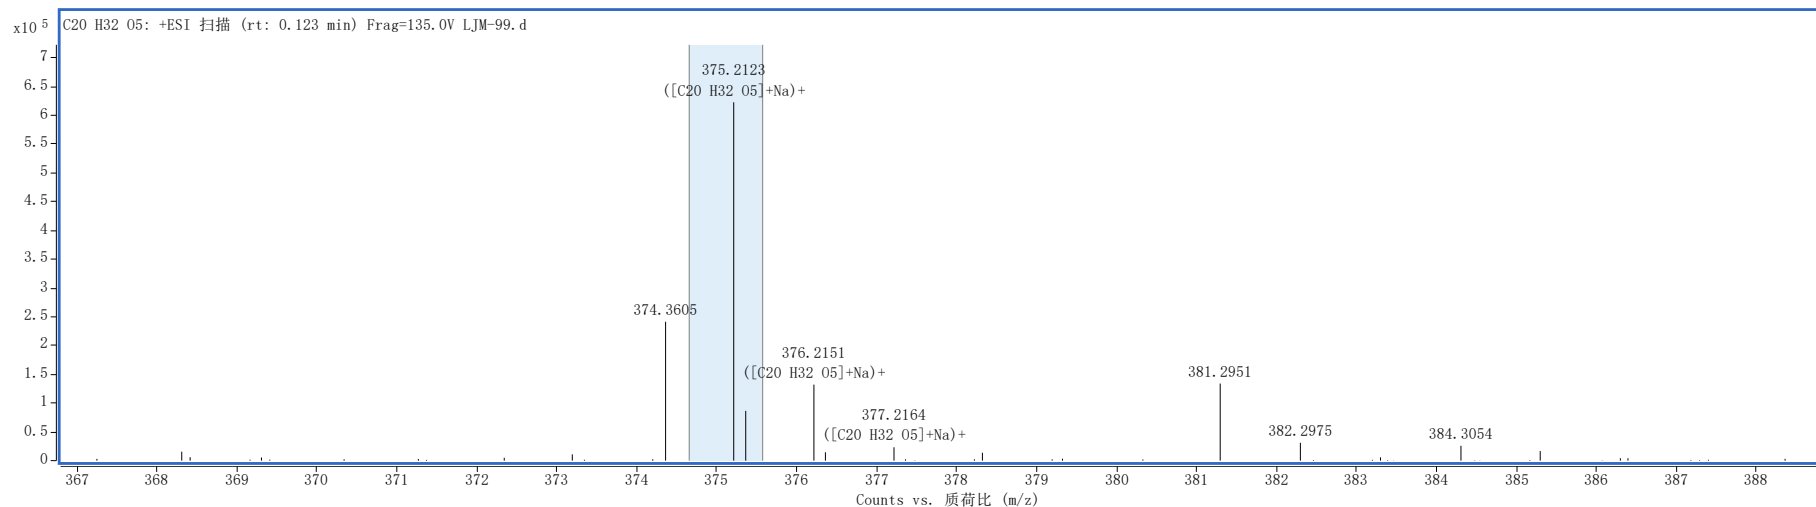

| 最佳   | ID 来源 | 分子式        | 种类      | m/z      | 分数    | Diff (ppm) | 分数 (MFG) |
|------|-------|------------|---------|----------|-------|------------|----------|
| TRUE | MFG   | C20 H32 O5 | (M+Na)+ | 375.2123 | 88.51 | 5.77       | 88.51    |

| 峰高总百分比 (Calc) | 峰高 (计算值) | 峰高百分数 (计算值) | m/z (Calc) | Diff (mDa) | 峰高       | 峰高百分数 | 峰高总百分比 | m/z      | Diff (ppm) |
|---------------|----------|-------------|------------|------------|----------|-------|--------|----------|------------|
| 79.6          | 619689.8 | 100         | 375.2142   | 1.9        | 622758.6 | 100   | 80     | 375.2123 | 4.95       |

Figure S95. HRESIMS spectrum of Noueinsiancin I (9)

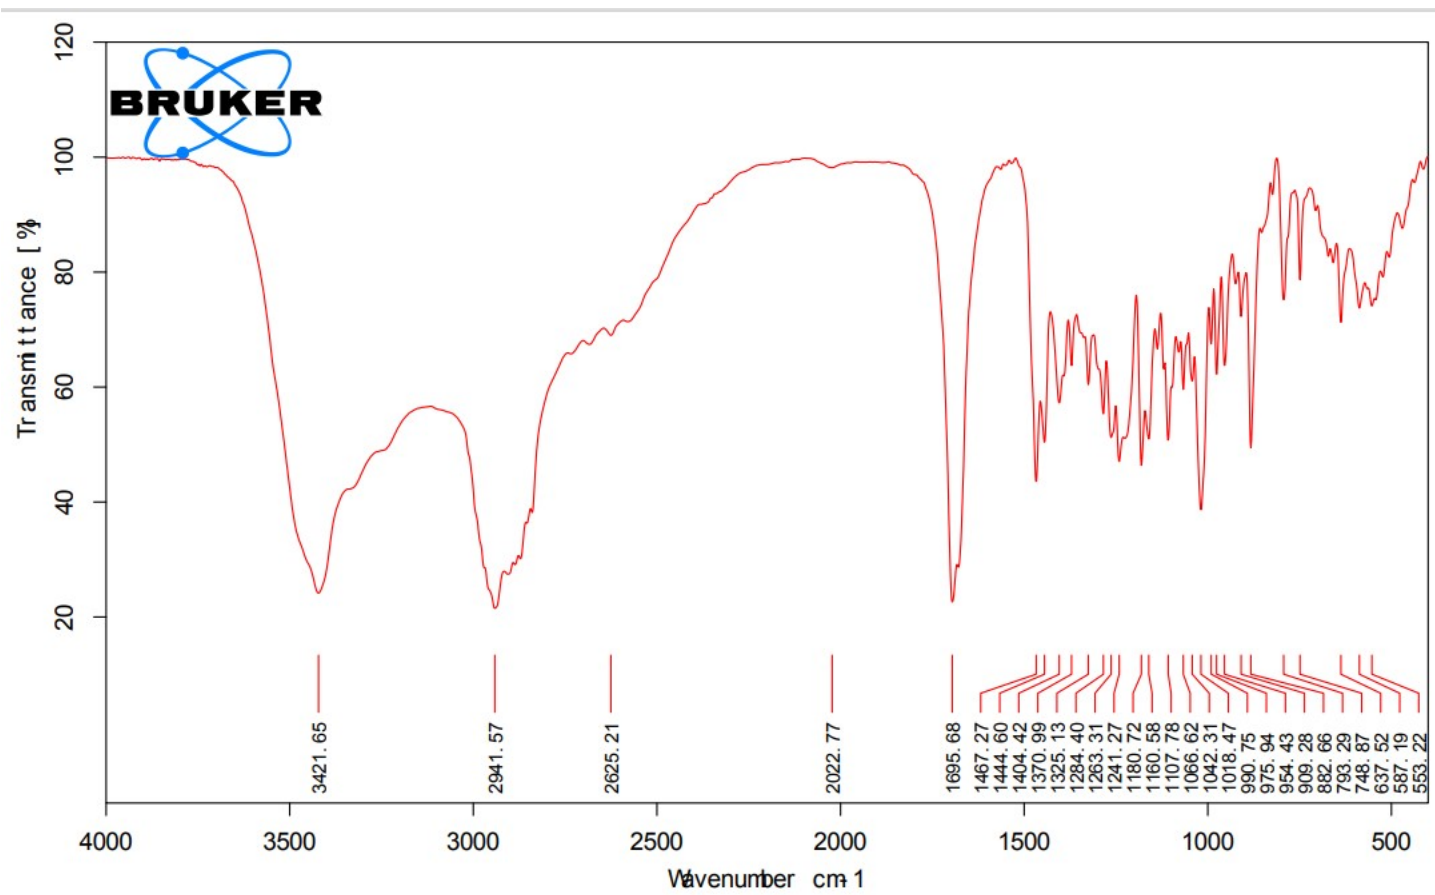

Figure S96. IR spectrum of Nouveinsiancin I (9)

**Rudolph Research Analytical**

Thursday, 02/10/2022

This sample was measured on an Autopol VI, serial number 90079, manufactured by Rudolph Research Analytical, Hackettstown, NJ.

LotID : LJM-99  
Set Temperature : 20.0  
Temp Corr : OFF

|          |                |                 |                |                |
|----------|----------------|-----------------|----------------|----------------|
| <b>n</b> | <b>Average</b> | <b>Std.Dev.</b> | <b>Maximum</b> | <b>Minimum</b> |
| 6        | -91.333        | 0.9428          | -90.000        | -92.000        |

| S.No | Sample ID | Time        | Result  | Scale | OR ° Arc | WLG | Lg.mm  | Conc. | Temp. | Comment |
|------|-----------|-------------|---------|-------|----------|-----|--------|-------|-------|---------|
| 1    | LJM-99    | 07:04:13 PM | -90.000 | SR    | -0.045   | 589 | 100.00 | 0.050 | 20.3  |         |
| 2    | LJM-99    | 07:04:19 PM | -92.000 | SR    | -0.046   | 589 | 100.00 | 0.050 | 20.2  |         |
| 3    | LJM-99    | 07:04:25 PM | -90.000 | SR    | -0.045   | 589 | 100.00 | 0.050 | 20.2  |         |
| 4    | LJM-99    | 07:04:31 PM | -92.000 | SR    | -0.046   | 589 | 100.00 | 0.050 | 20.2  |         |
| 5    | LJM-99    | 07:04:36 PM | -92.000 | SR    | -0.046   | 589 | 100.00 | 0.050 | 20.2  |         |
| 6    | LJM-99    | 07:04:42 PM | -92.000 | SR    | -0.046   | 589 | 100.00 | 0.050 | 20.1  |         |

\_\_\_\_\_  
Signature

**Figure S97. OR Value of Noueinsiancin I (9) in CH<sub>3</sub>OH**

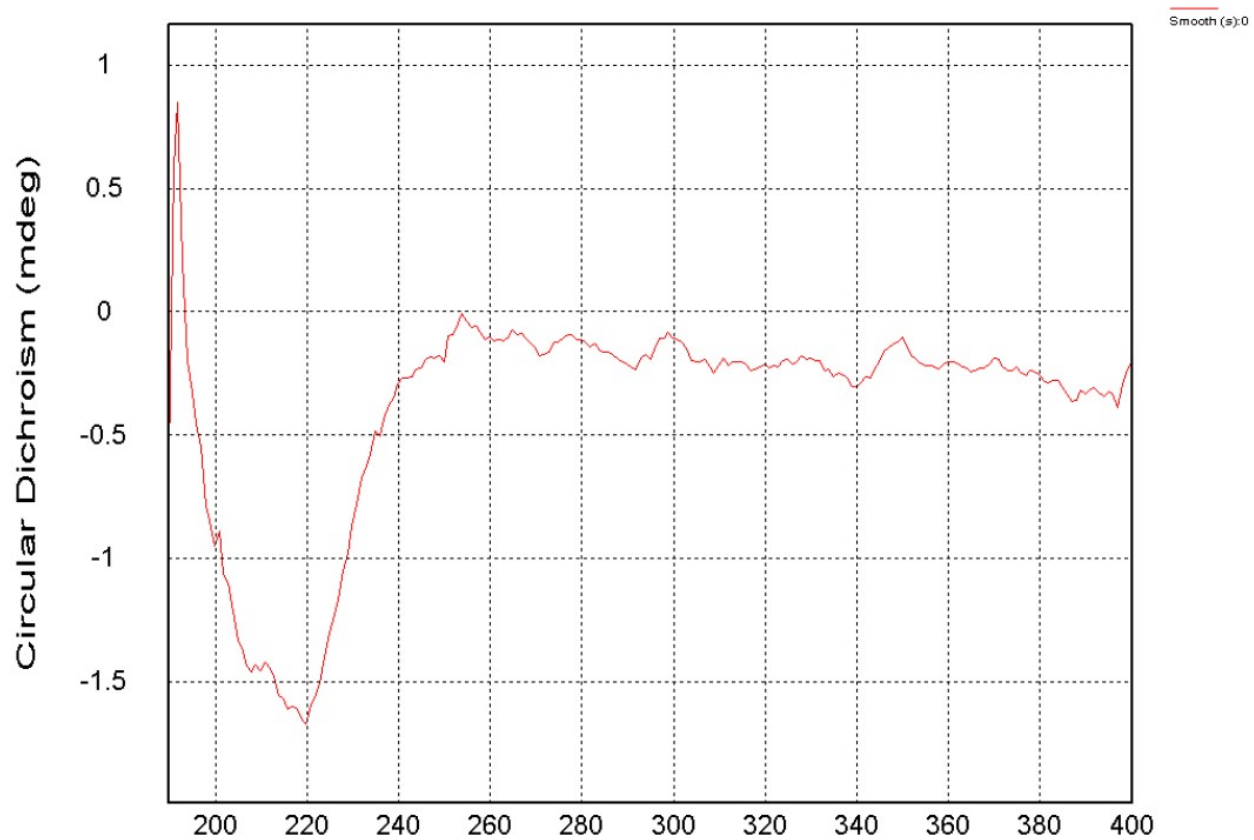

Figure S98. CD Value of Noueinsiancin I (9) in CH<sub>3</sub>OH

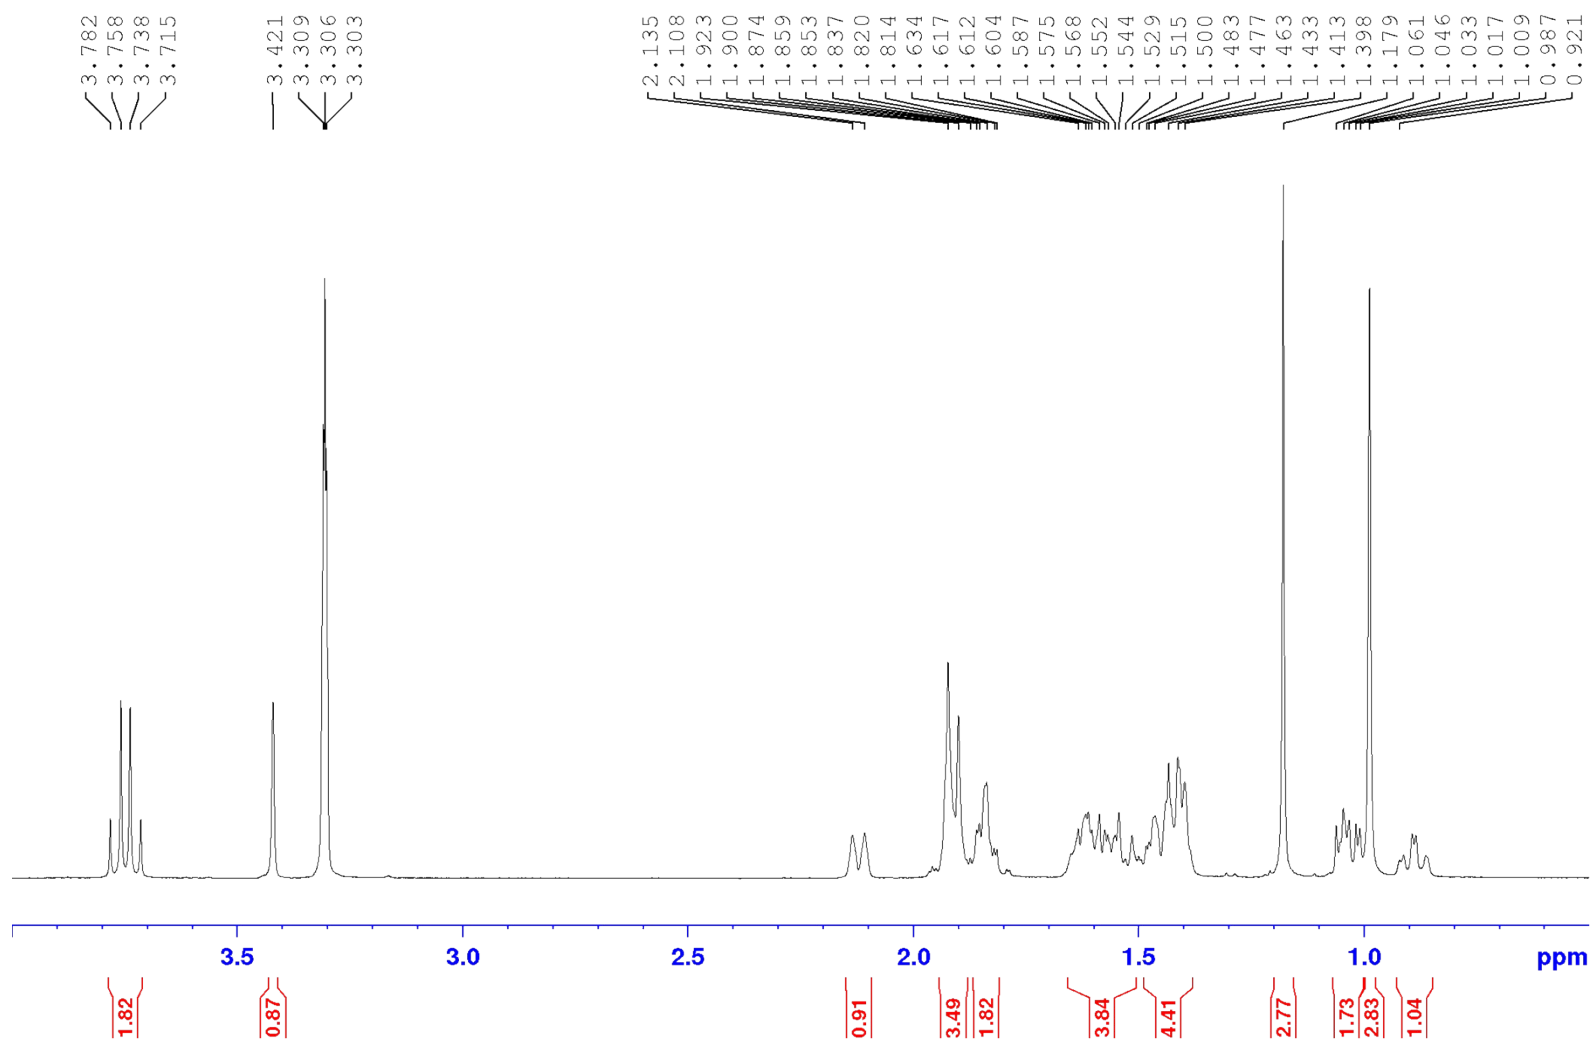

Figure S99.  $^1\text{H}$  NMR spectrum of Noueinsiancin I (9) in  $\text{CD}_3\text{OD}$

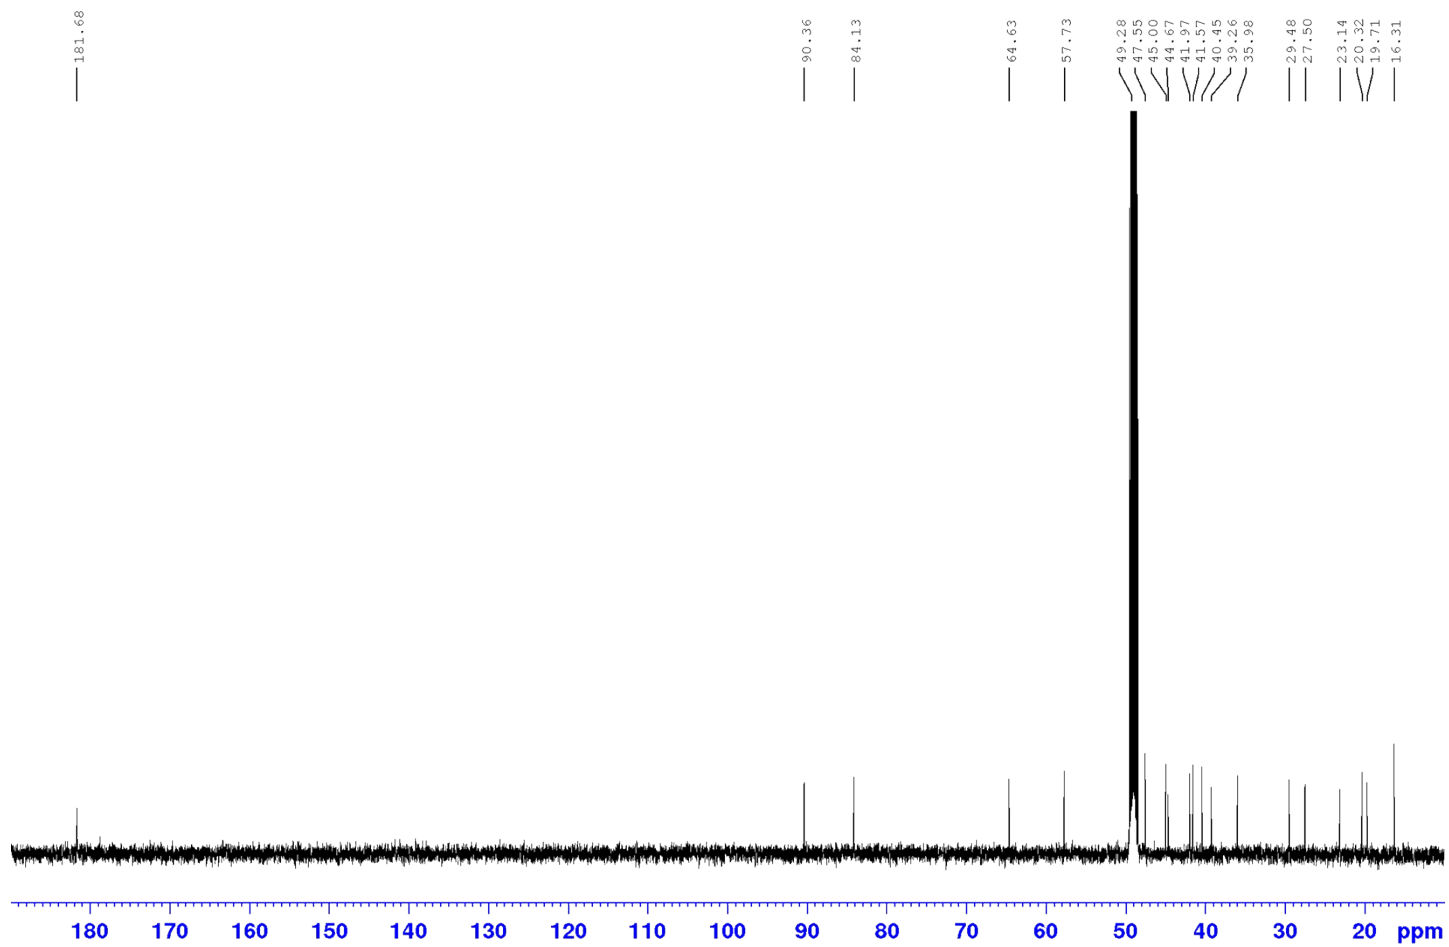

Figure S100.  $^{13}\text{C}$  NMR spectrum of Noueinsiancin I (9) in  $\text{CD}_3\text{OD}$



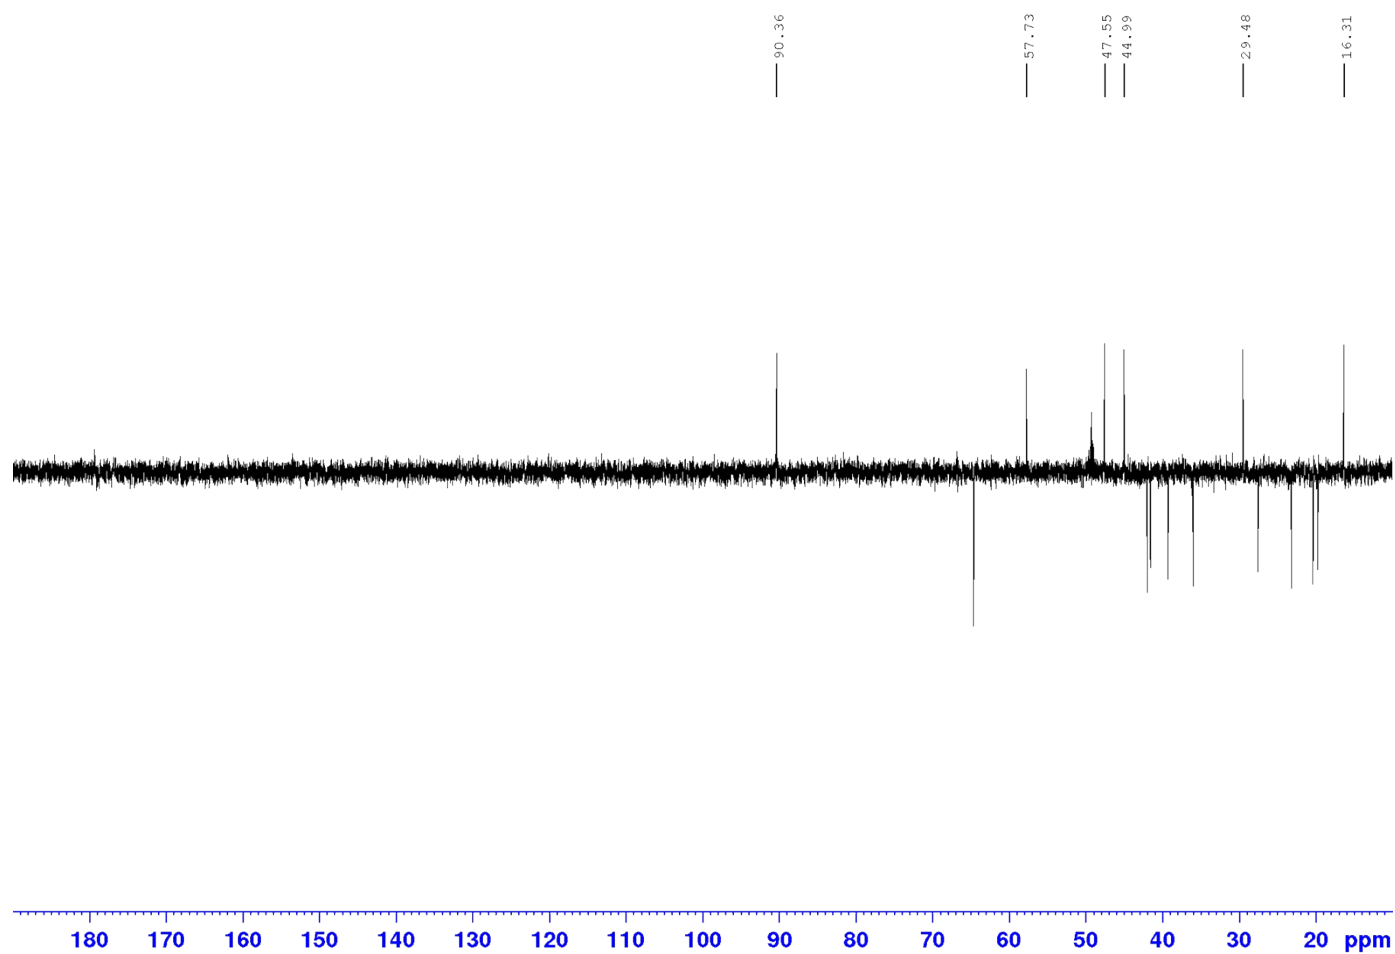

Figure S101. DEPT-135 NMR spectrum of Noueinsiancin I (9) in CD<sub>3</sub>OD

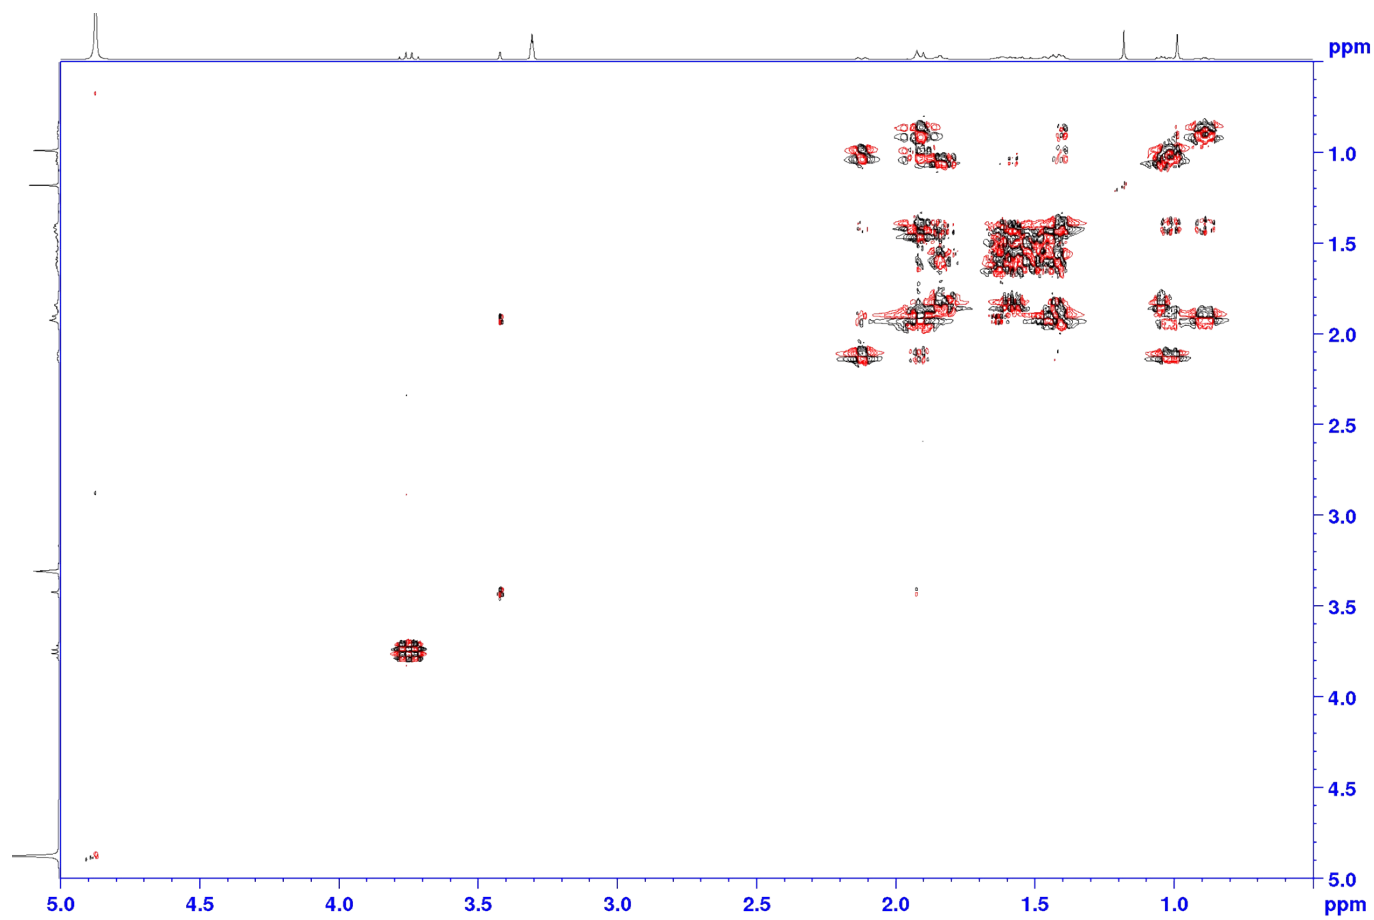

Figure S102.  $^1\text{H}$ - $^1\text{H}$  COSY spectrum of Nouveinsiancin I (9) in  $\text{CD}_3\text{OD}$

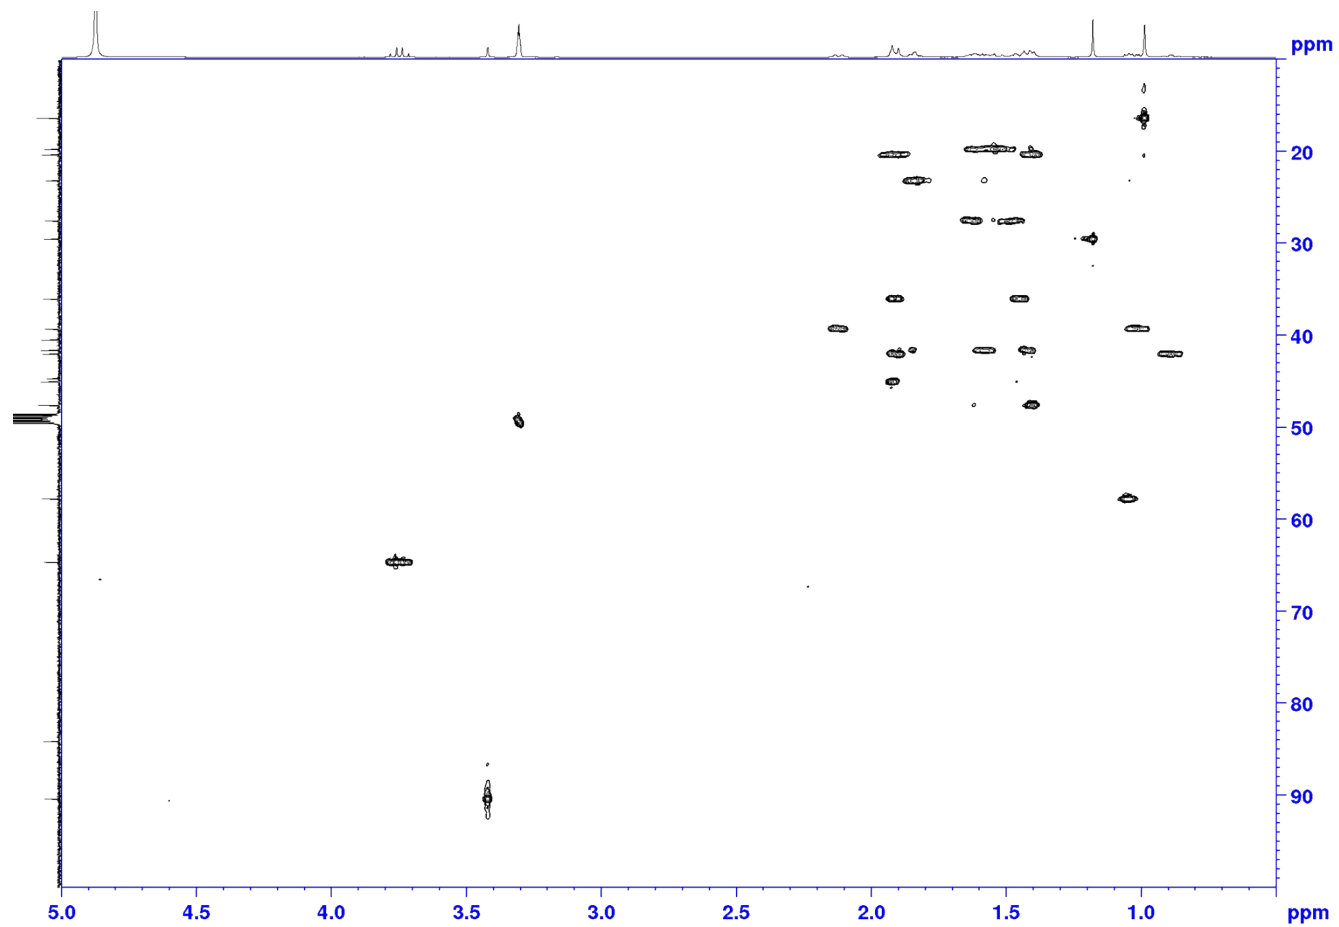

Figure S103. HSQC spectrum of Noueinsiancin I (9) in CD<sub>3</sub>OD

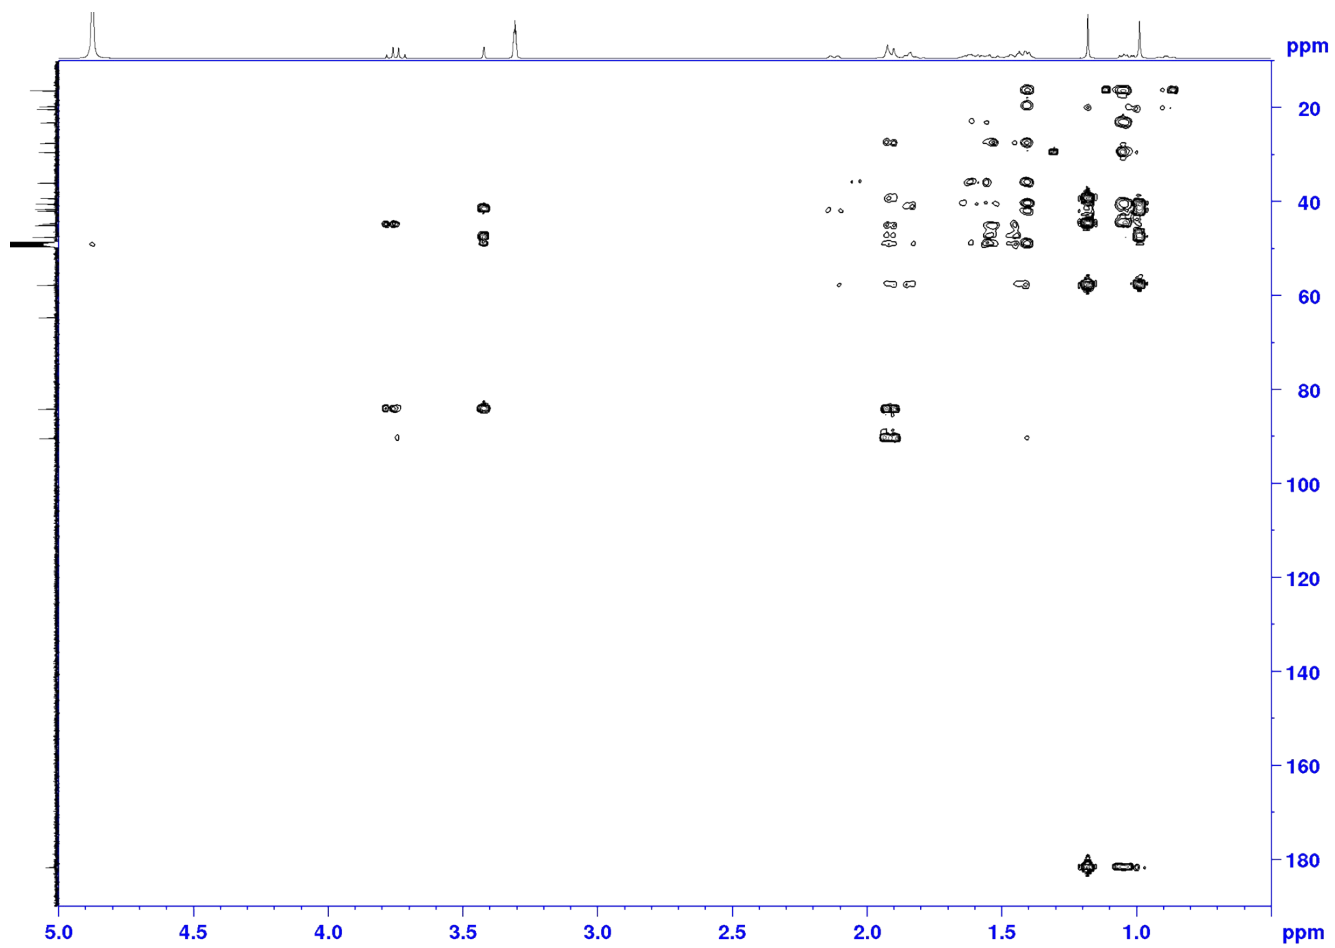

Figure S104. HMBC spectrum of Noueinsiaincin I (9) in CD<sub>3</sub>OD

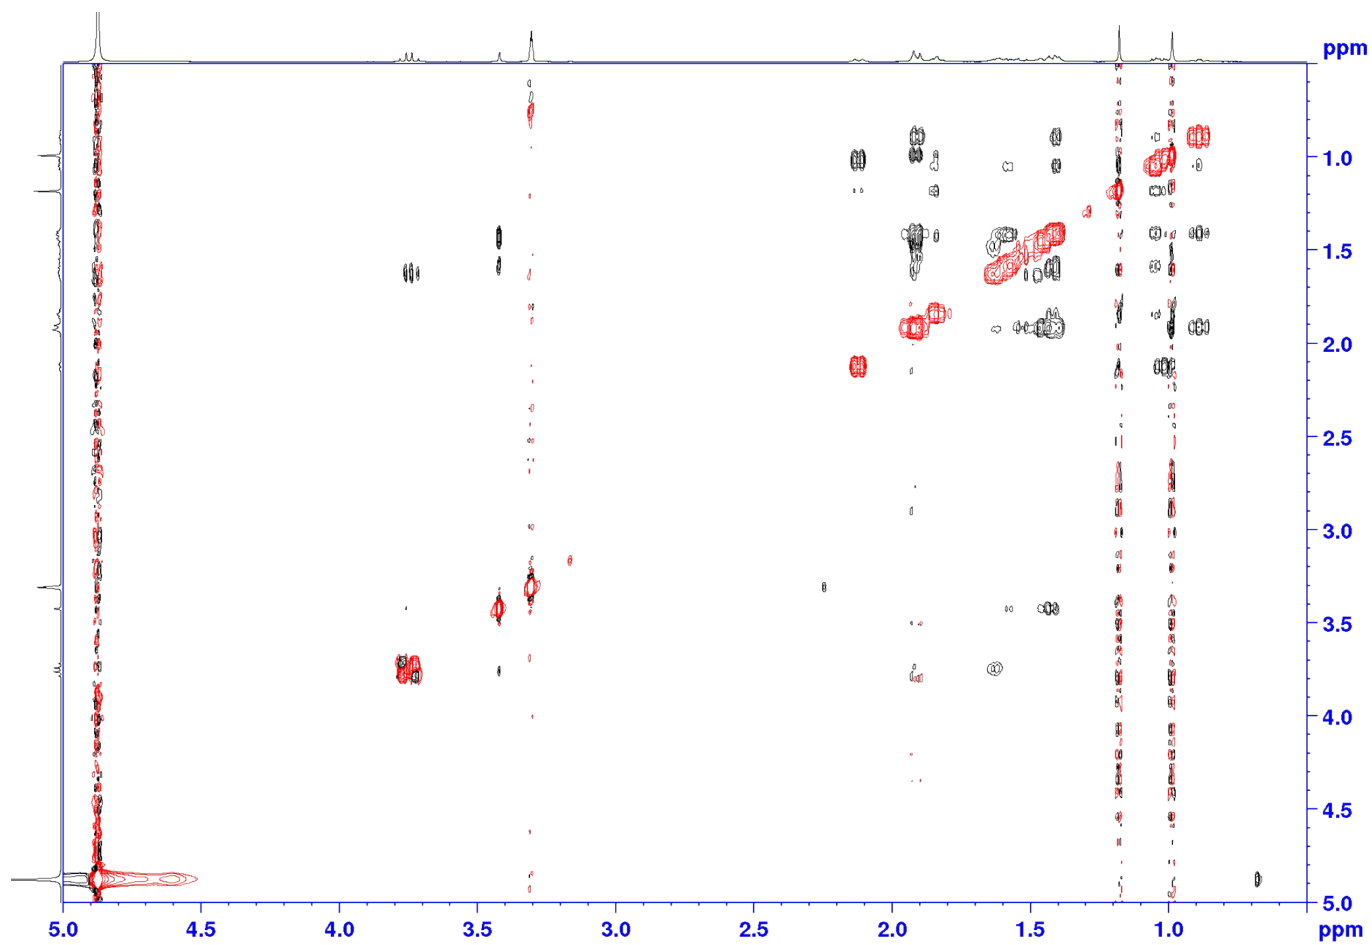

Figure S105. NOESY spectrum of Noueinsiancin I (9) in CD<sub>3</sub>OD

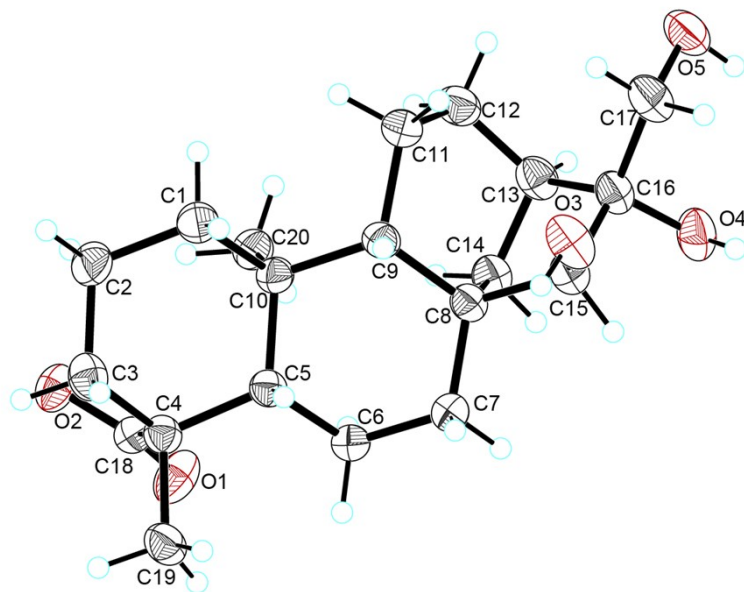

**Figure S106. X-ray structure of Noueinsiancin I (9)**

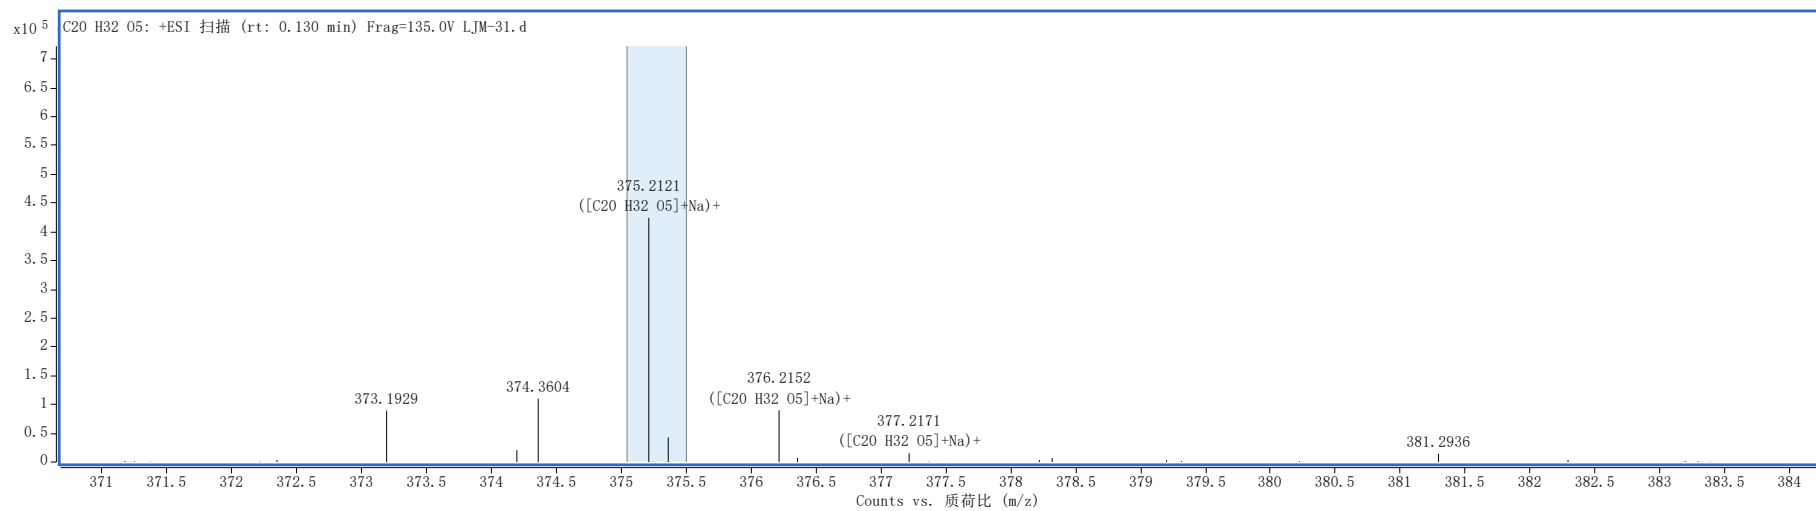

| 最佳   | ID 来源 | 分子式        | 种类      | m/z      | 分数    | Diff (ppm) | 分数 (MFG) |
|------|-------|------------|---------|----------|-------|------------|----------|
| TRUE | MFG   | C20 H32 O5 | (M+Na)+ | 375.2121 | 87.64 | 6.25       | 87.64    |

| 峰高总百分比 (Calc) | 峰高 (计算值) | 峰高百分数(计算值) | m/z (Calc) | Diff (mDa) | 峰高       | 峰高百分数 | 峰高总百分比 | m/z      | Diff (ppm) |
|---------------|----------|------------|------------|------------|----------|-------|--------|----------|------------|
| 79.6          | 421699.4 | 100        | 375.2142   | 2.1        | 424357.5 | 100   | 80.1   | 375.2121 | 5.67       |

Figure S107. HRESIMS spectrum of Nouveinsiancin J (10)

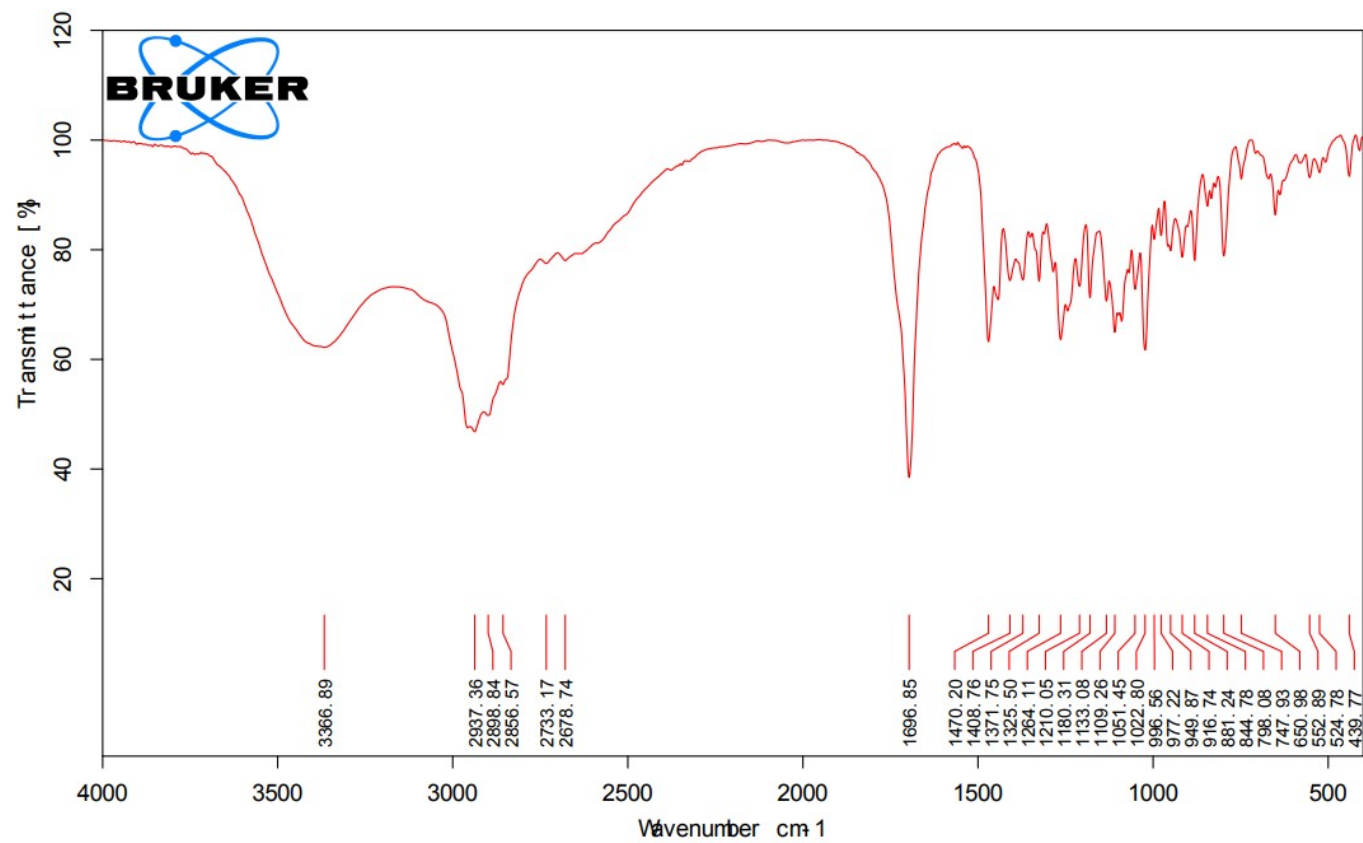

Figure S108. IR spectrum of Noueinsiancin J (10)



**Rudolph Research Analytical**

Wednesday, 02/09/2022

This sample was measured on an Autopol VI, serial number 90079,  
manufactured by Rudolph Research Analytical, Hackettstown, NJ.

LotID : LJM-31  
Set Temperature : 20.0  
Temp Corr : OFF

| <b>n</b>    | <b>Average</b>   | <b>Std.Dev.</b> | <b>Maximum</b> | <b>Minimum</b> |                 |            |              |              |              |                |
|-------------|------------------|-----------------|----------------|----------------|-----------------|------------|--------------|--------------|--------------|----------------|
| 6           | -87.000          | 0.0000          | -87.000        | -87.000        |                 |            |              |              |              |                |
| <b>S.No</b> | <b>Sample ID</b> | <b>Time</b>     | <b>Result</b>  | <b>Scale</b>   | <b>OR ° Arc</b> | <b>WLG</b> | <b>Lg.mm</b> | <b>Conc.</b> | <b>Temp.</b> | <b>Comment</b> |
| 1           | LJM-31           | 03:42:49 PM     | -87.000        | SR             | -0.087          | 589        | 100.00       | 0.100        | 19.7         |                |
| 2           | LJM-31           | 03:42:54 PM     | -87.000        | SR             | -0.087          | 589        | 100.00       | 0.100        | 19.7         |                |
| 3           | LJM-31           | 03:43:00 PM     | -87.000        | SR             | -0.087          | 589        | 100.00       | 0.100        | 19.7         |                |
| 4           | LJM-31           | 03:43:06 PM     | -87.000        | SR             | -0.087          | 589        | 100.00       | 0.100        | 19.7         |                |
| 5           | LJM-31           | 03:43:12 PM     | -87.000        | SR             | -0.087          | 589        | 100.00       | 0.100        | 19.8         |                |
| 6           | LJM-31           | 03:43:18 PM     | -87.000        | SR             | -0.087          | 589        | 100.00       | 0.100        | 19.8         |                |

\_\_\_\_\_  
Signature

**Figure S109. OR Value of Noueinsiancin J (10) in CH<sub>3</sub>OH**

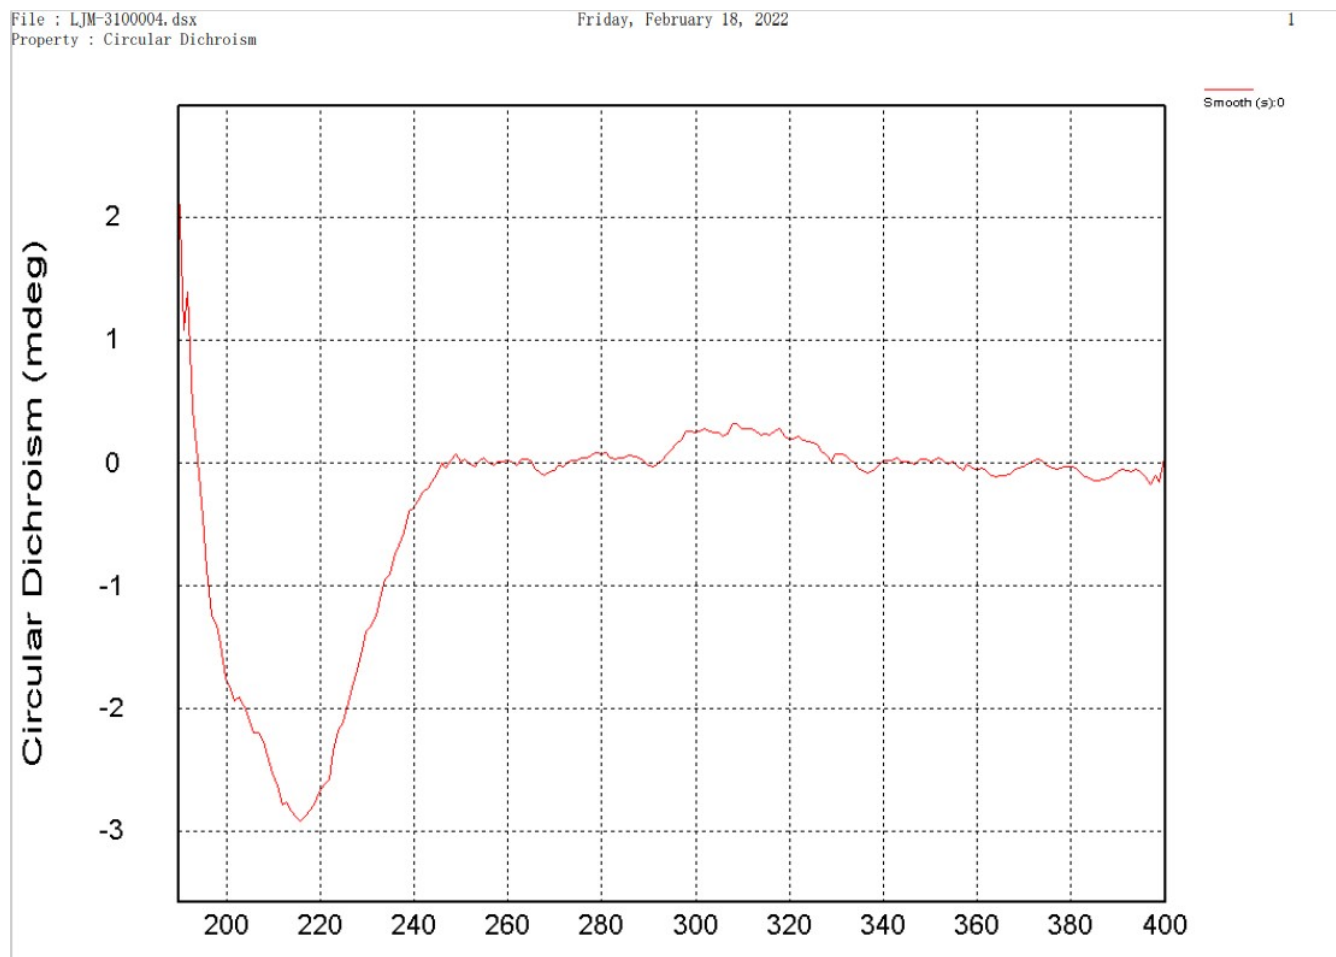

Figure S110. CD Value of Noueinsiancin J (10) in CH<sub>3</sub>OH

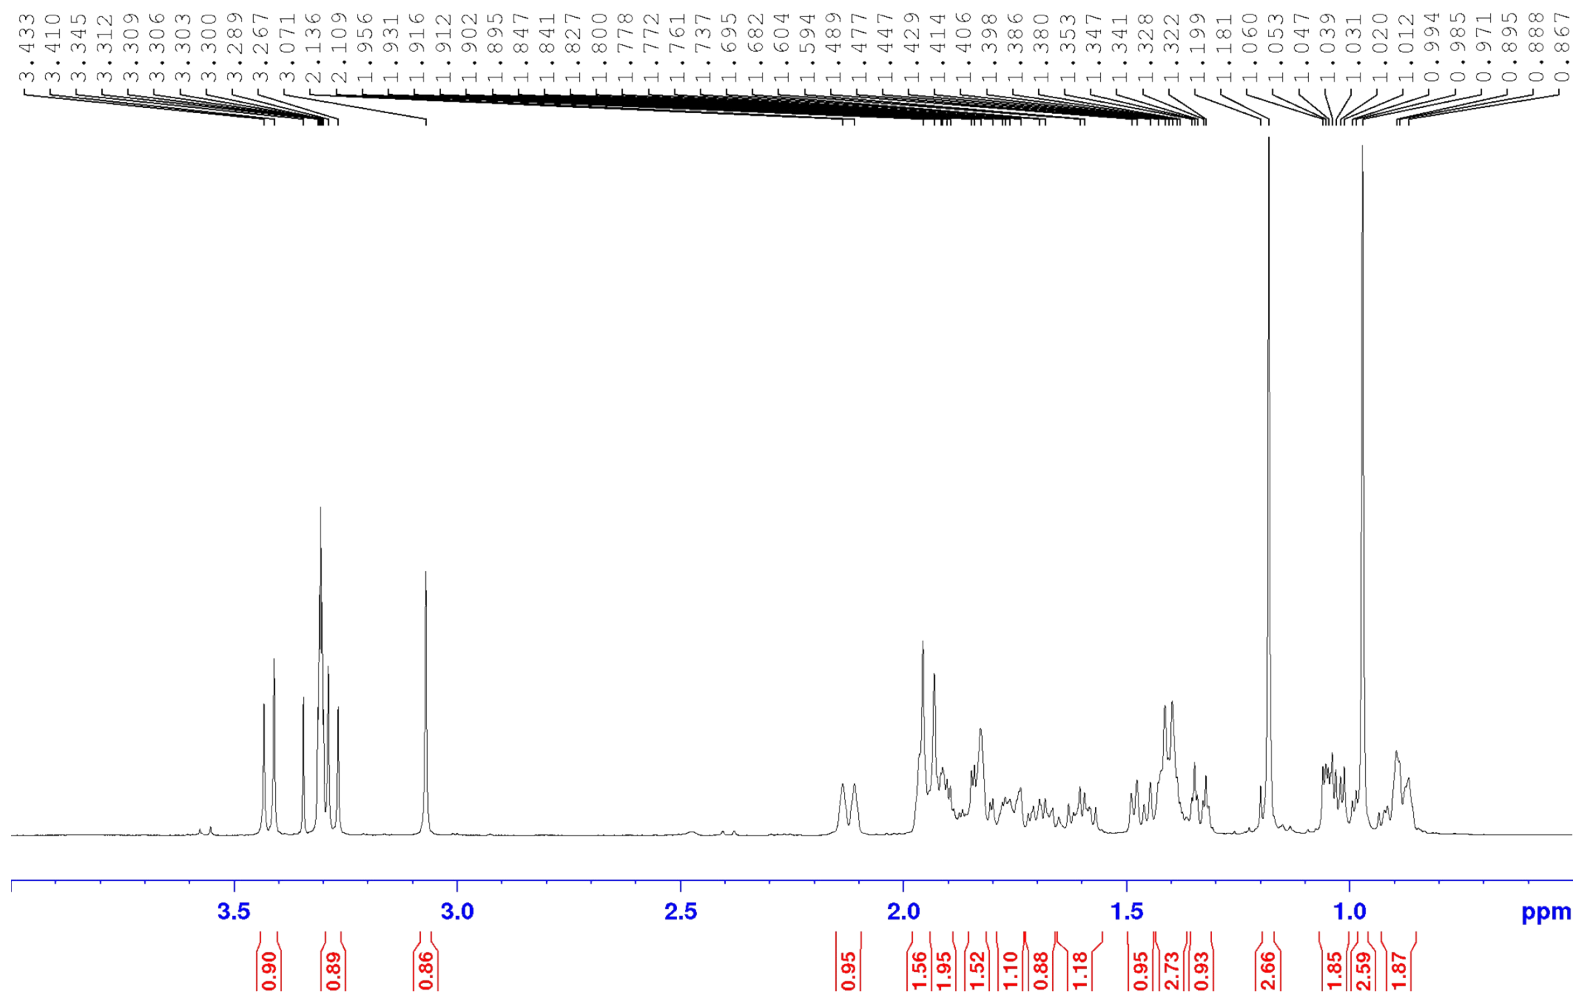

Figure S111. <sup>1</sup>H NMR spectrum of Noueinsiancin J (10) in CD<sub>3</sub>OD

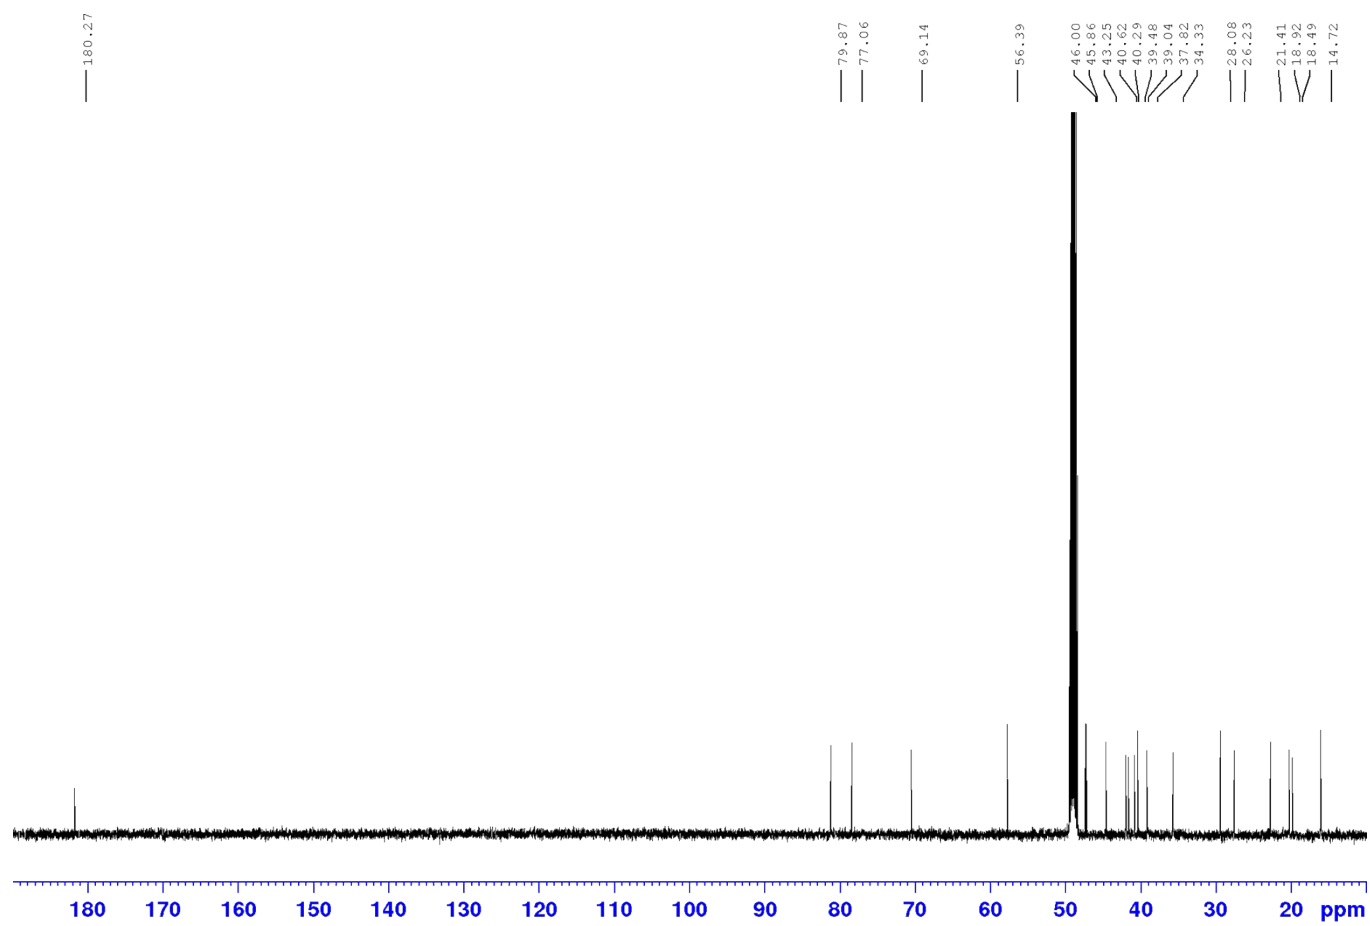

Figure S112. <sup>13</sup>C NMR spectrum of Noueinsiancin J (10) in CD<sub>3</sub>OD

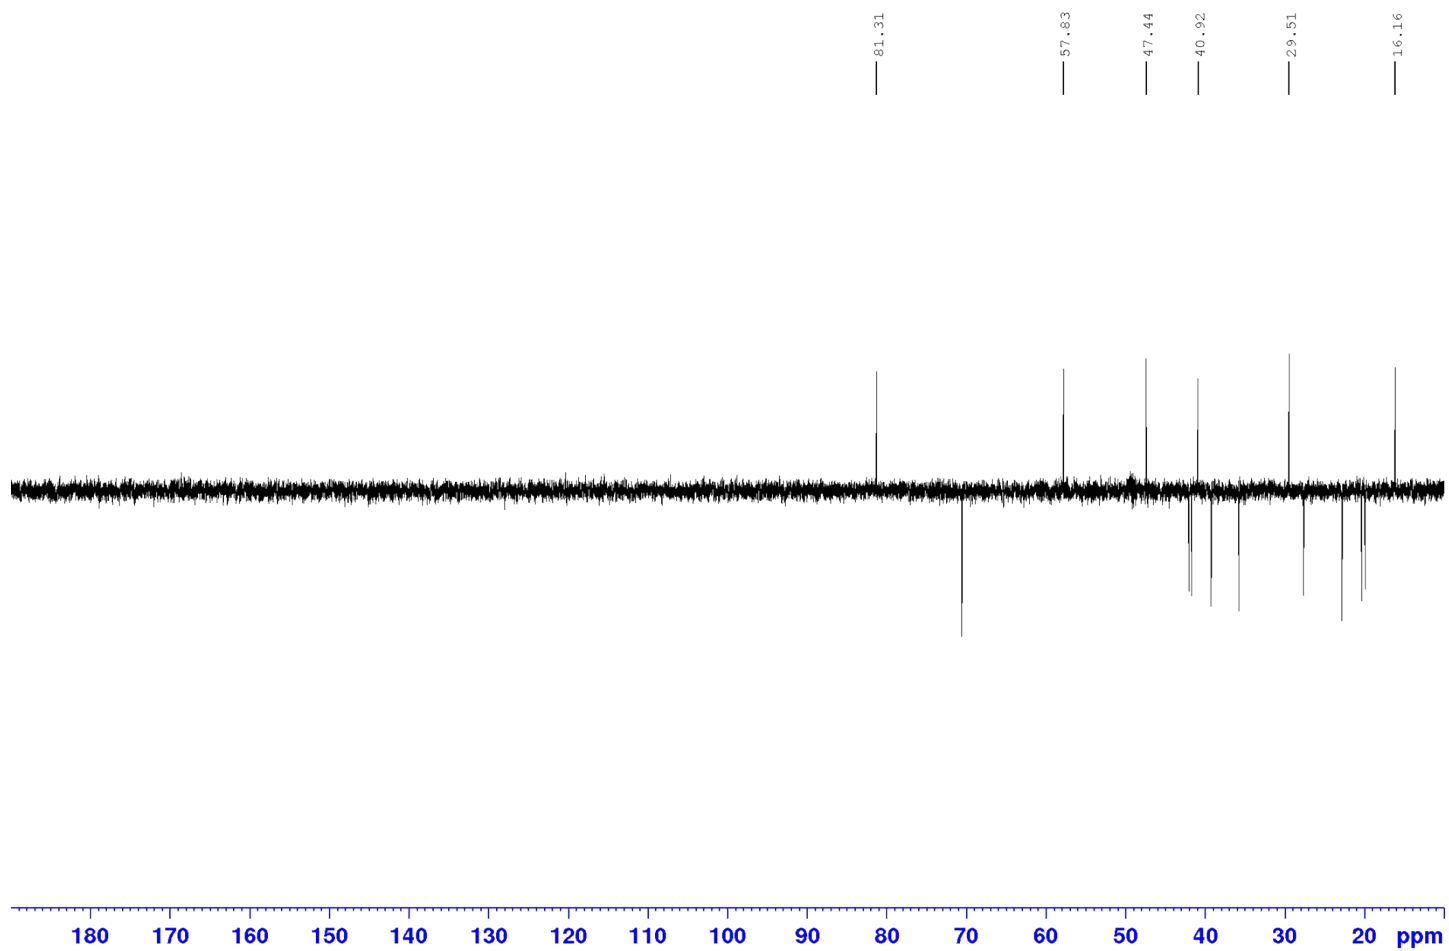

Figure S113. DEPT-135 NMR spectrum of Noueinsiancin J (10) in CD<sub>3</sub>OD

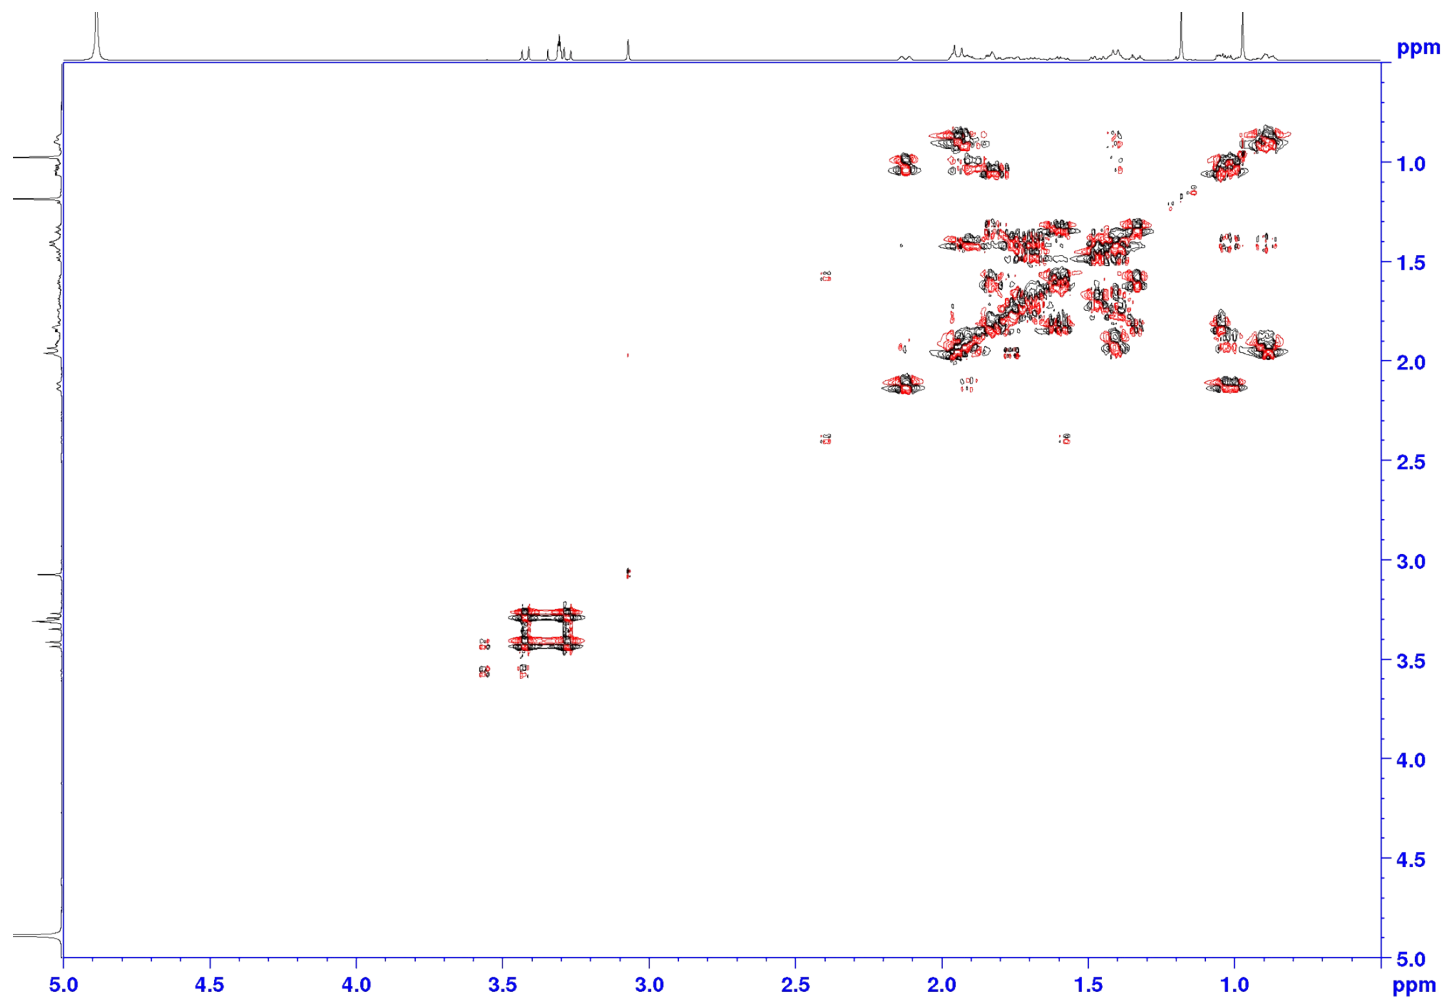

Figure S114.  $^1\text{H}$ - $^1\text{H}$  COSY spectrum of Noueinsiancin J (10) in  $\text{CD}_3\text{OD}$

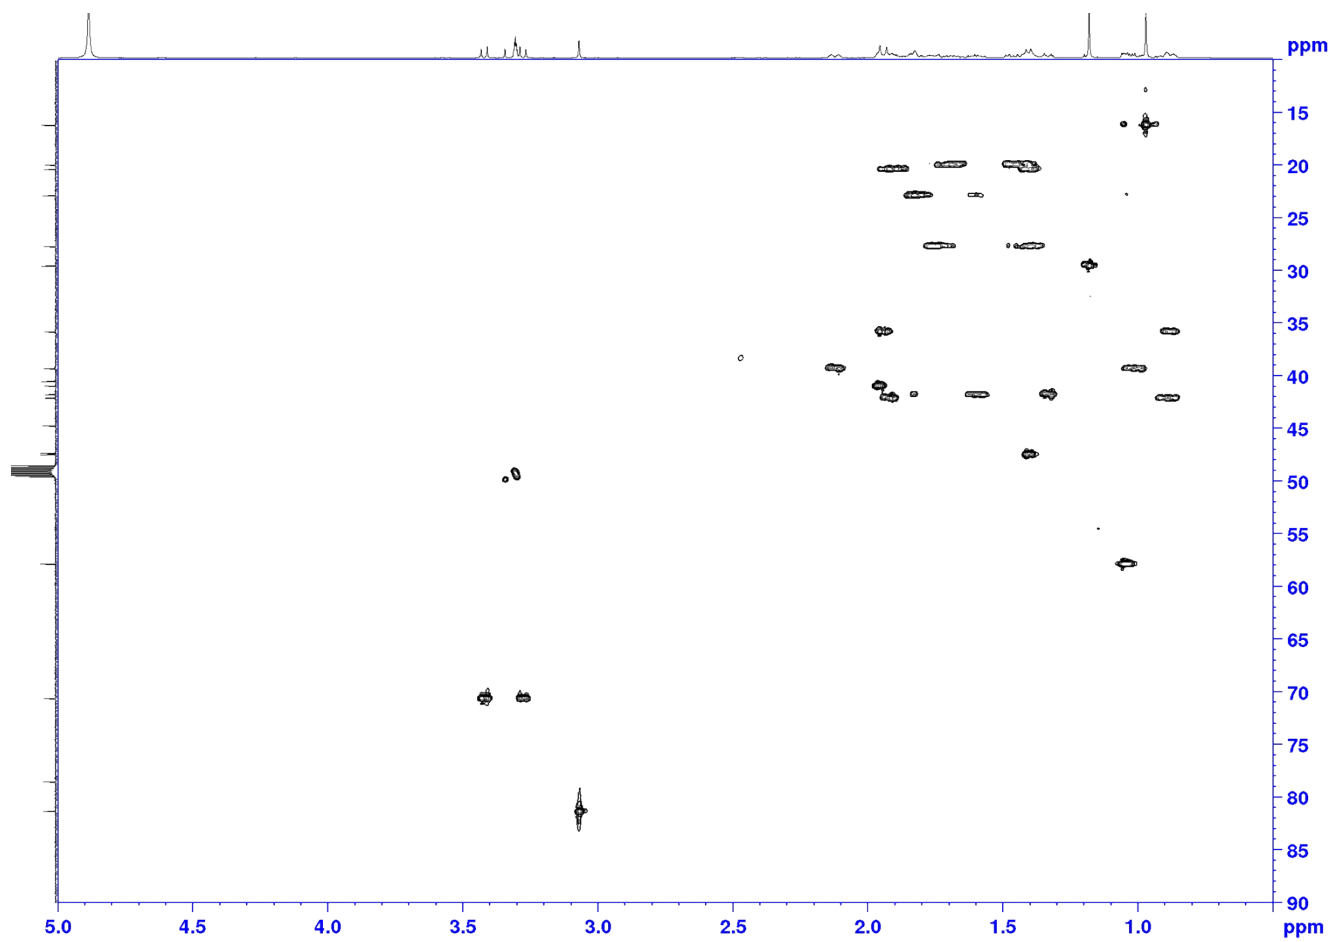

Figure S115. HSQC spectrum of Noueinsiancin J (10) in CD<sub>3</sub>OD

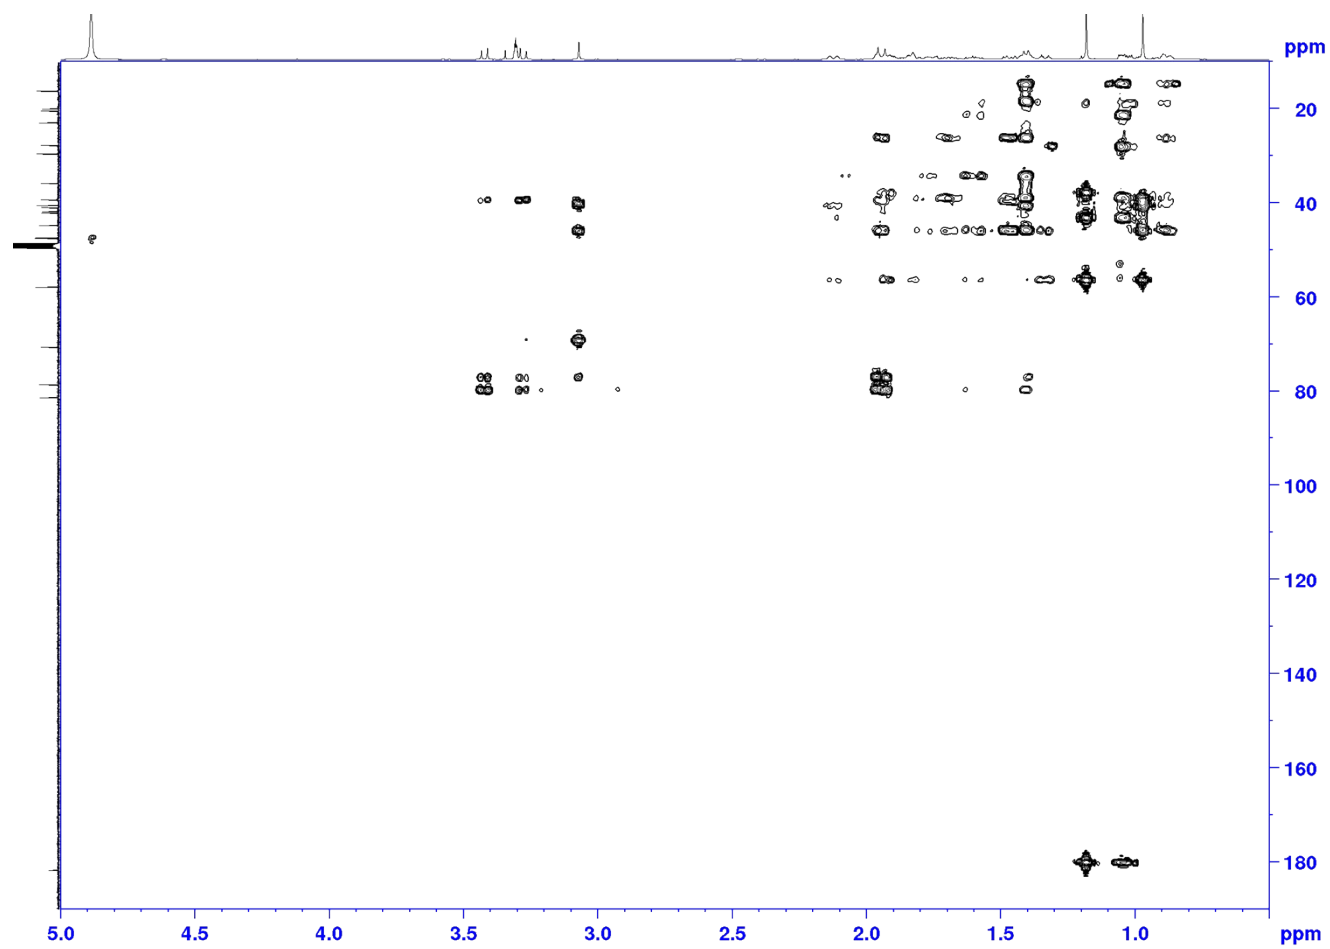

Figure S116. HMBC spectrum of Noueinsiaincin J (10) in CD<sub>3</sub>OD



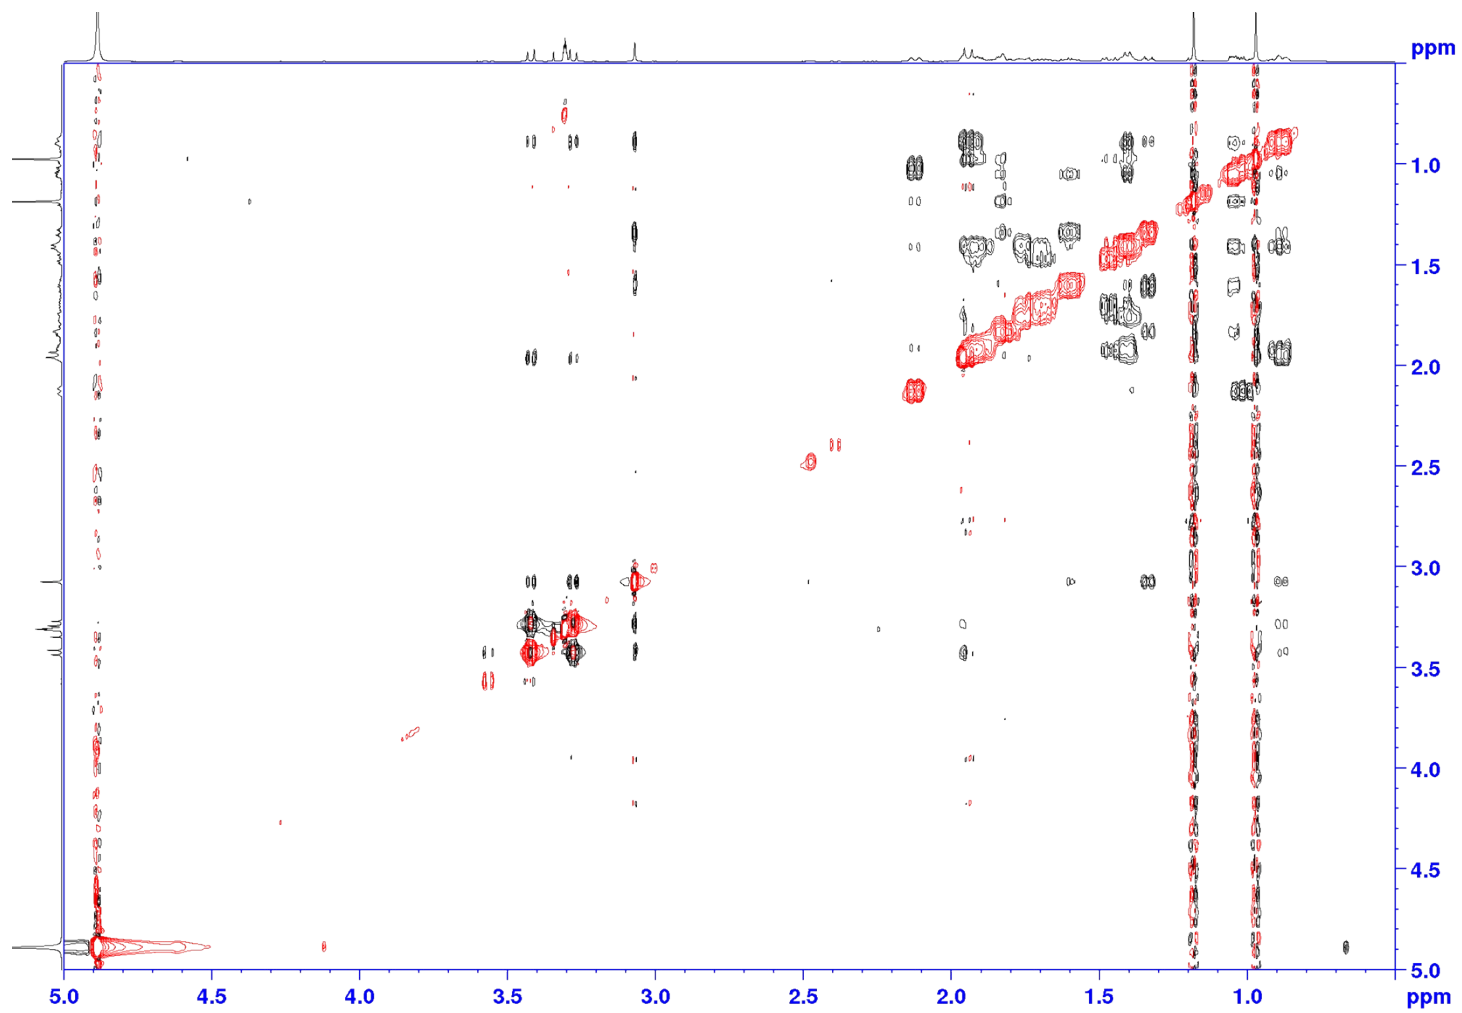

Figure S117. NOESY spectrum of Noueinsiancin J (10) in CD<sub>3</sub>OD

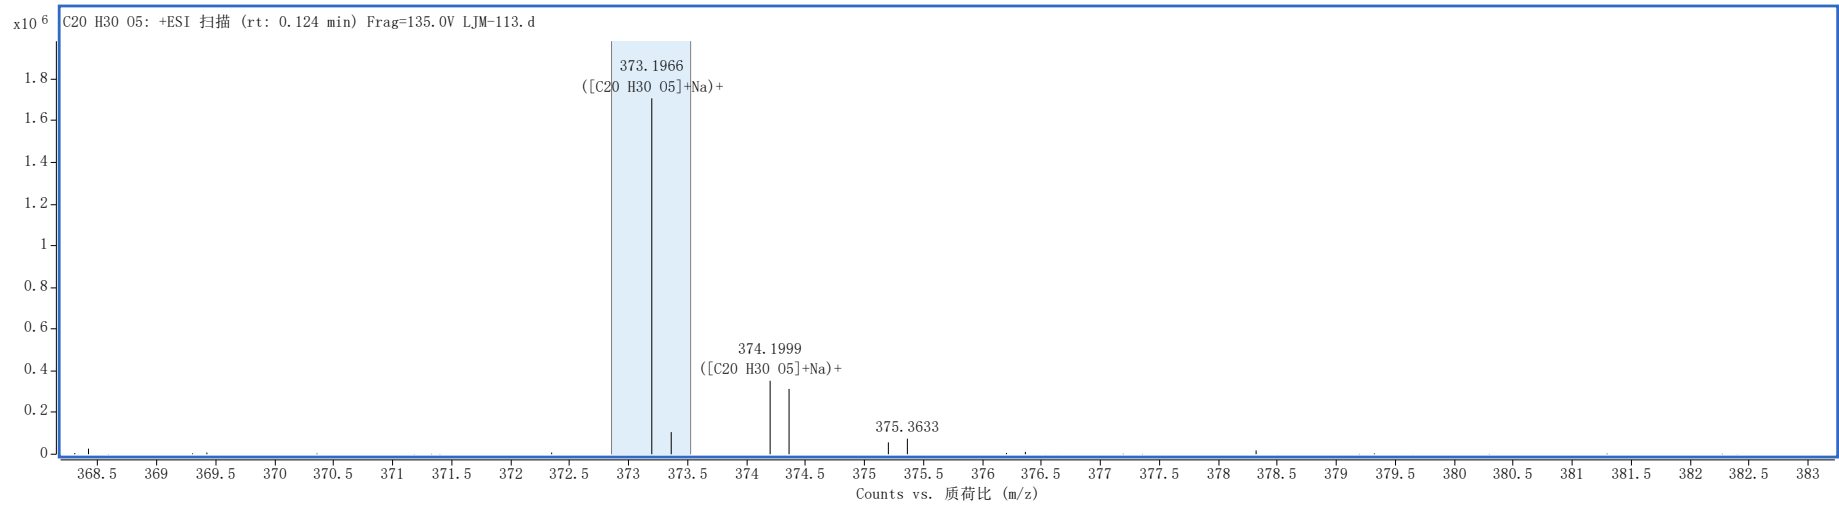

| 最佳   | ID 来源 | 分子式        | 种类      | m/z      | 分数    | Diff (ppm) | 分数 (MFG) |
|------|-------|------------|---------|----------|-------|------------|----------|
| TRUE | MFG   | C20 H30 O5 | (M+Na)+ | 373.1966 | 89.33 | 5.71       | 89.33    |

| 峰高总百分比 (Calc) | 峰高 (计算值)  | 峰高百分数 (计算值) | m/z (Calc) | Diff (mDa) | 峰高        | 峰高百分数 | 峰高总百分比 | m/z      | Diff (ppm) |
|---------------|-----------|-------------|------------|------------|-----------|-------|--------|----------|------------|
| 79.7          | 1686932.3 | 100         | 373.1985   | 2          | 1708077.2 | 100   | 80.7   | 373.1966 | 5.28       |

**Figure S118. HRESIMS spectrum of Nouveinsiancin K (11)**

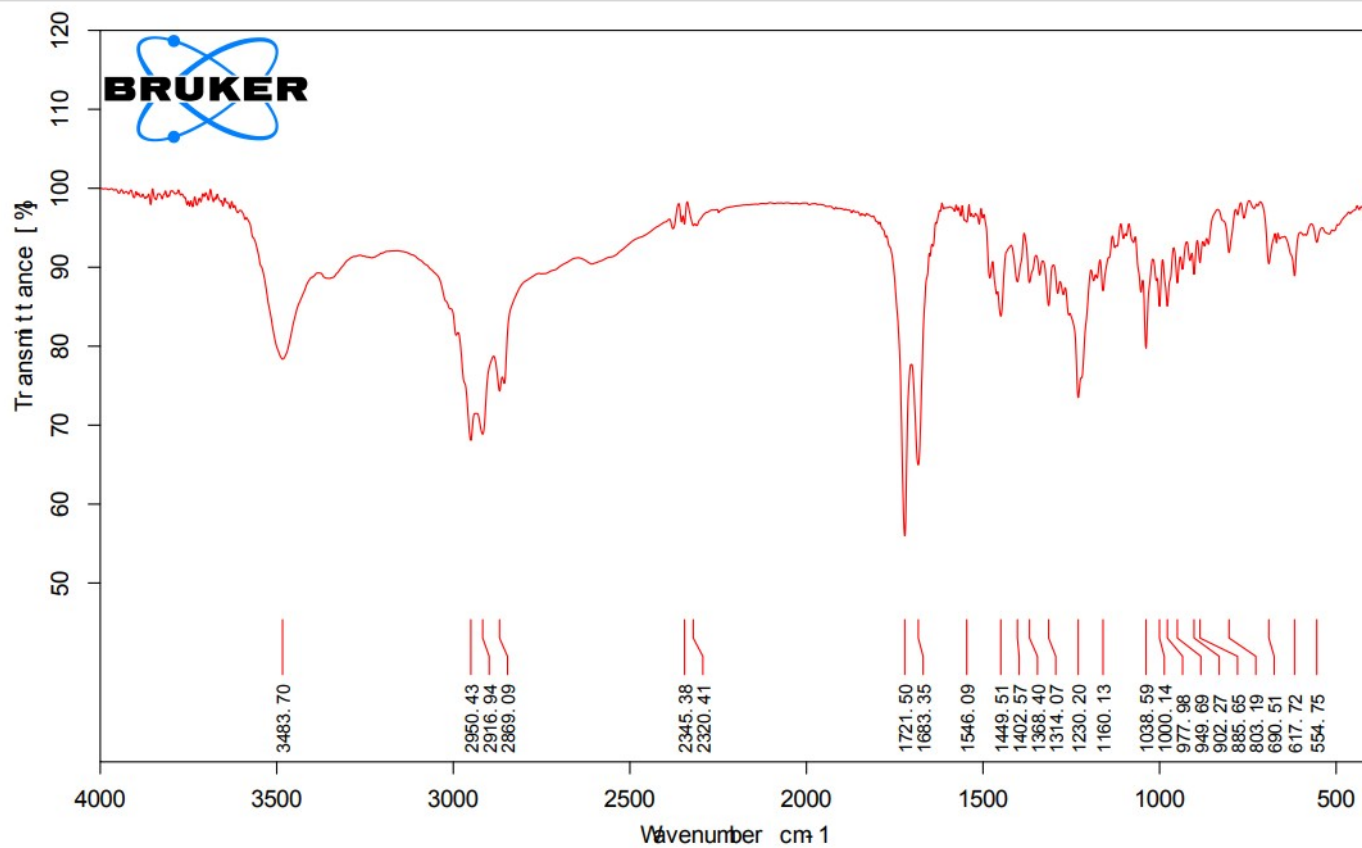

Figure S119. IR spectrum of Noueinsiancin K (11)

**Rudolph Research Analytical**

Thursday, 02/10/2022

This sample was measured on an Autopol VI, serial number 90079,  
manufactured by Rudolph Research Analytical, Hackettstown, NJ.

LotID : LJM-113  
Set Temperature : 20.0  
Temp Corr : OFF

|          |                |                 |                |                |
|----------|----------------|-----------------|----------------|----------------|
| <b>n</b> | <b>Average</b> | <b>Std.Dev.</b> | <b>Maximum</b> | <b>Minimum</b> |
| 6        | -96.000        | 0.0000          | -96.000        | -96.000        |

| S.No | Sample ID | Time        | Result  | Scale | OR ° Arc | WLG | Lg.mm  | Conc. | Temp. | Comment |
|------|-----------|-------------|---------|-------|----------|-----|--------|-------|-------|---------|
| 1    | LJM-113   | 08:12:00 PM | -96.000 | SR    | -0.048   | 589 | 100.00 | 0.050 | 20.3  |         |
| 2    | LJM-113   | 08:12:05 PM | -96.000 | SR    | -0.048   | 589 | 100.00 | 0.050 | 20.2  |         |
| 3    | LJM-113   | 08:12:11 PM | -96.000 | SR    | -0.048   | 589 | 100.00 | 0.050 | 20.2  |         |
| 4    | LJM-113   | 08:12:16 PM | -96.000 | SR    | -0.048   | 589 | 100.00 | 0.050 | 20.2  |         |
| 5    | LJM-113   | 08:12:21 PM | -96.000 | SR    | -0.048   | 589 | 100.00 | 0.050 | 20.2  |         |
| 6    | LJM-113   | 08:12:27 PM | -96.000 | SR    | -0.048   | 589 | 100.00 | 0.050 | 20.1  |         |

\_\_\_\_\_  
Signature

**Figure S120. OR Value of Noueinsiancin K (11) in CH<sub>3</sub>OH**

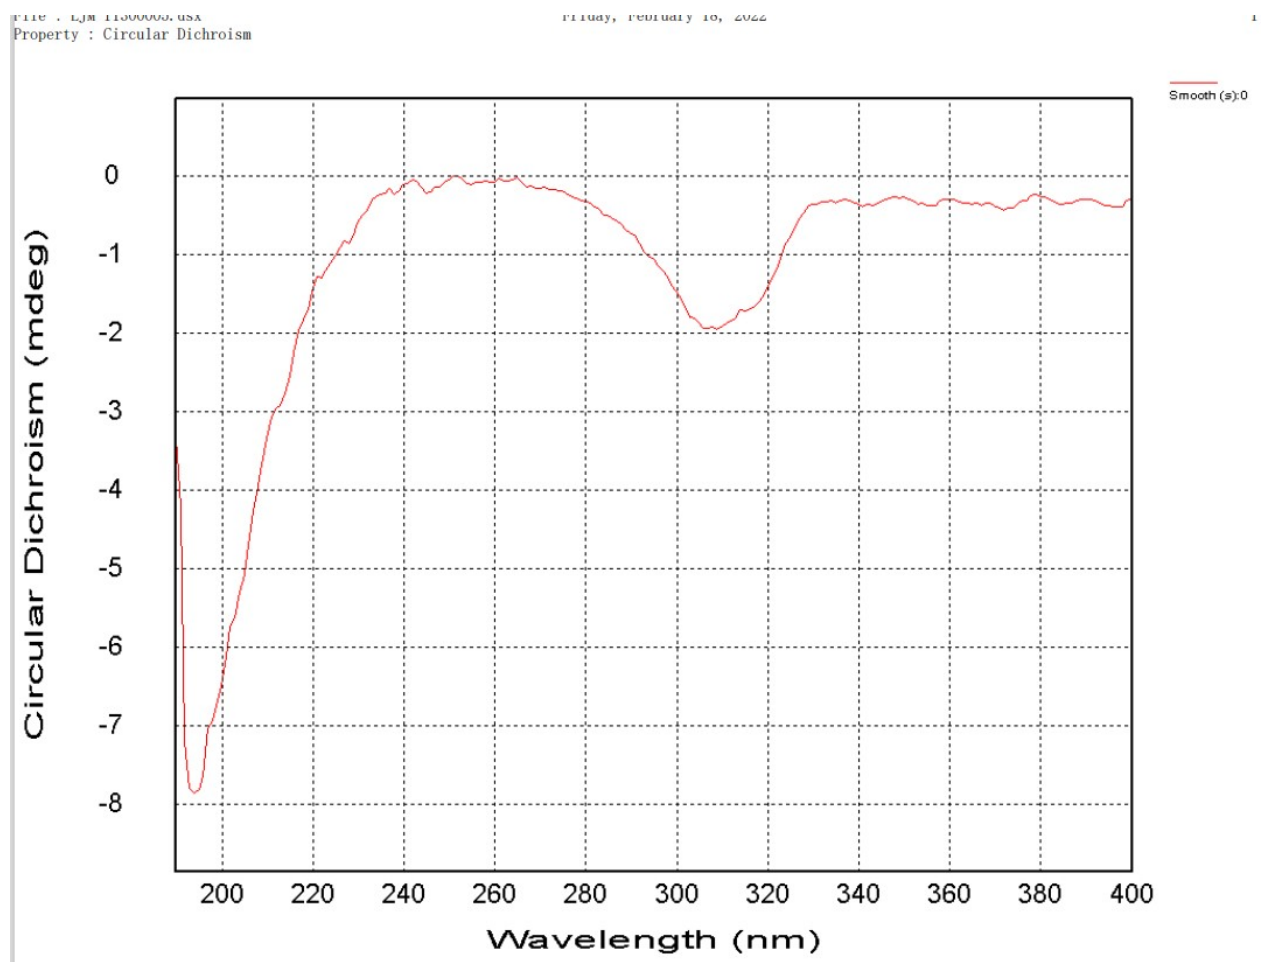

Figure S121. CD Value of Noueinsiancin K (11) in CH<sub>3</sub>OH

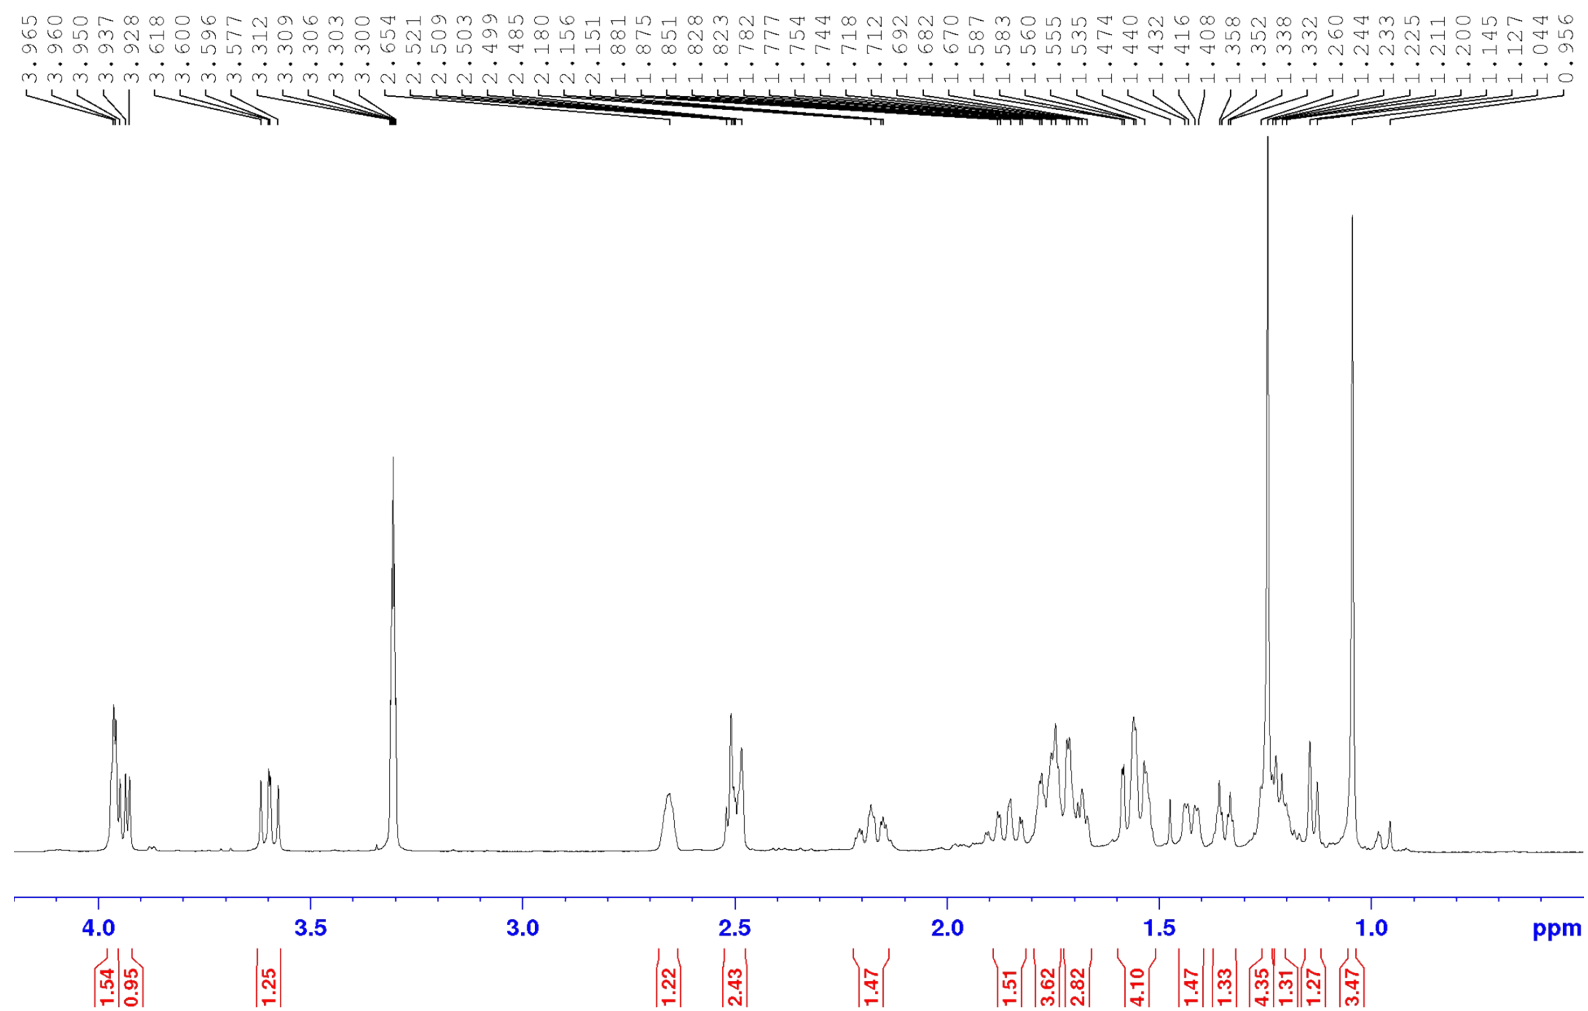

Figure S122. <sup>1</sup>H NMR spectrum of Noueinsiancin K (11) in CD<sub>3</sub>OD

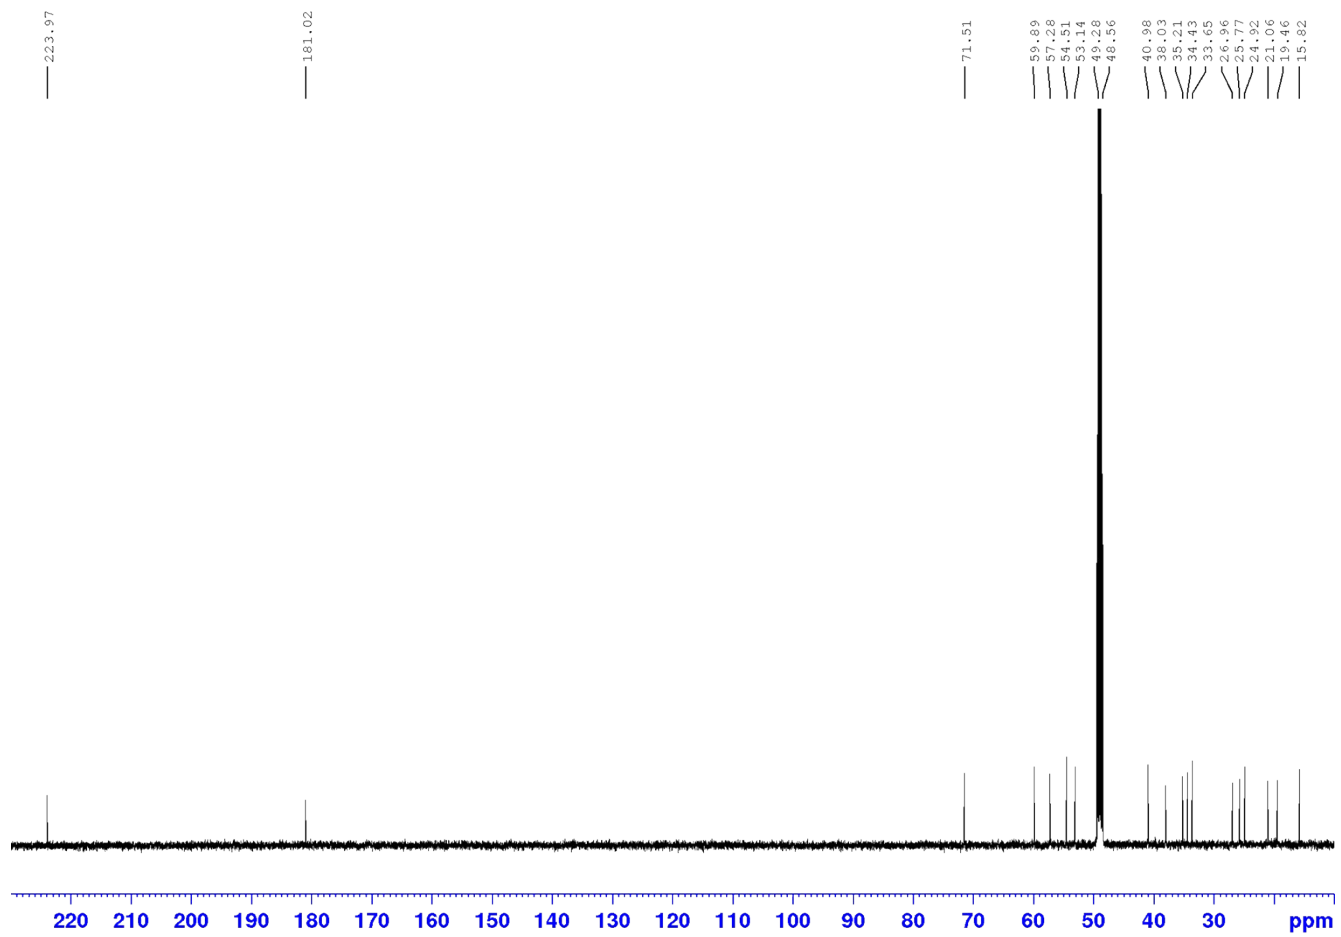

Figure S123. <sup>13</sup>C NMR spectrum of Noueinsiancin K (11) in CD<sub>3</sub>OD

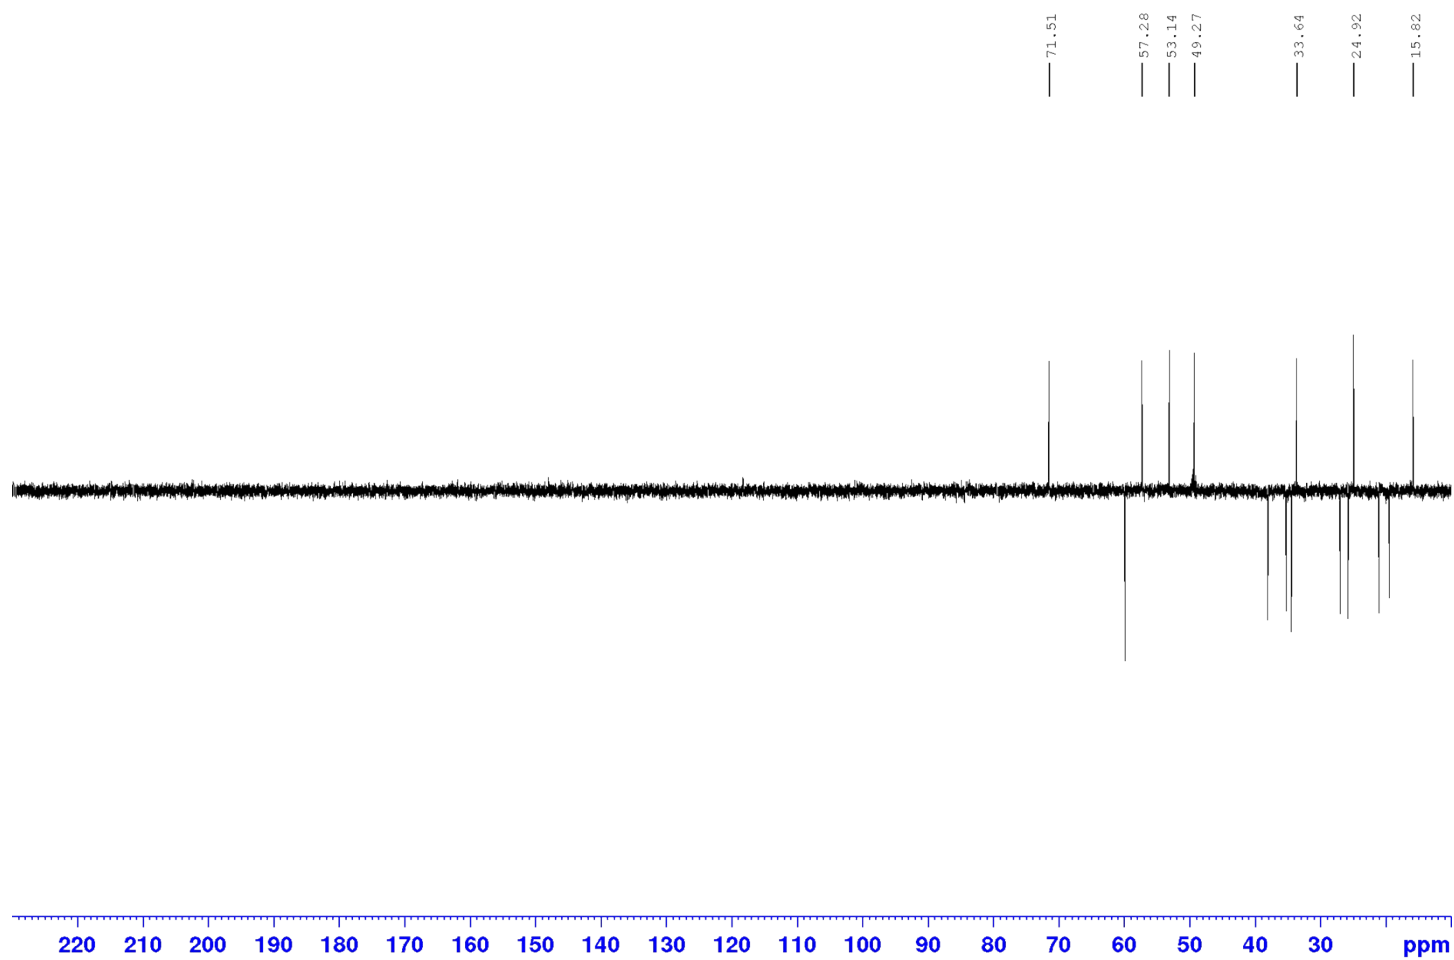

Figure S124. DEPT-135 NMR spectrum of Noueinsiancin K (11) in CD<sub>3</sub>OD



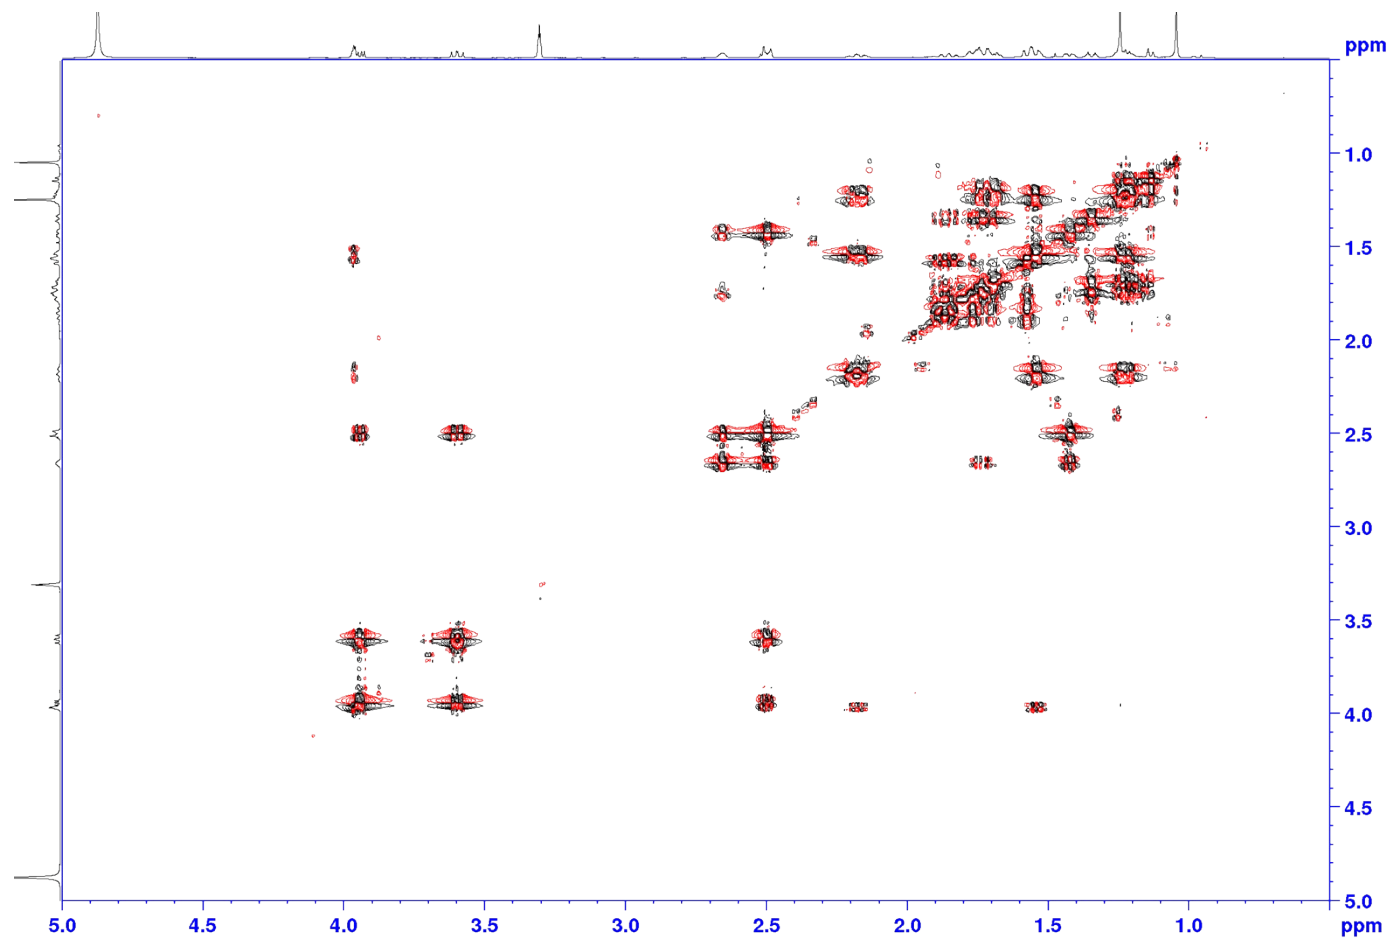

Figure S125.  $^1\text{H}$ - $^1\text{H}$  COSY spectrum of Noueinsiancin K (11) in  $\text{CD}_3\text{OD}$

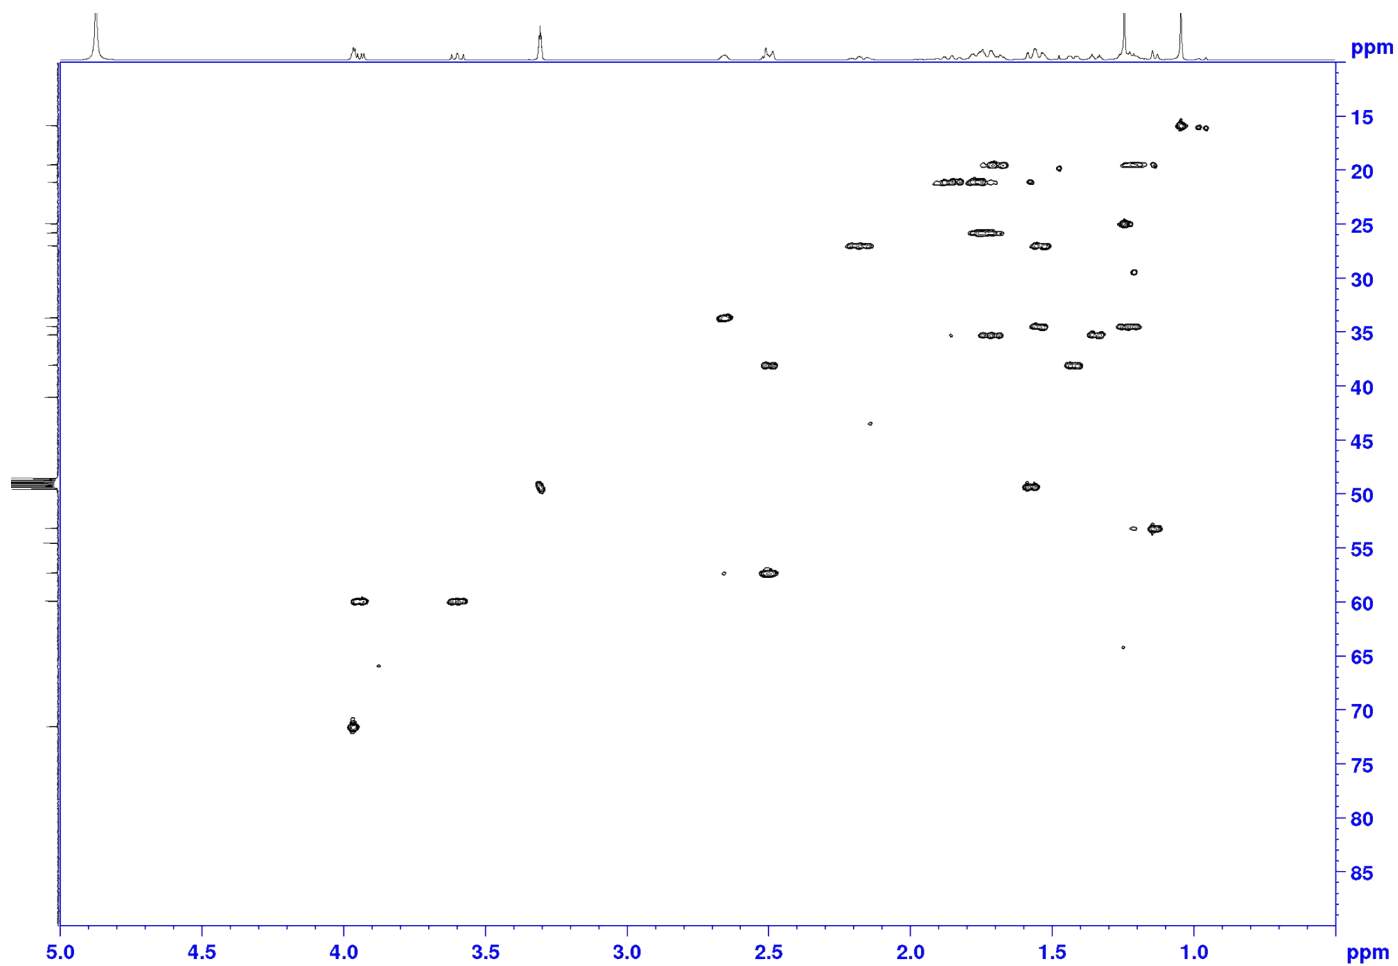

Figure S126. HSQC spectrum of Noueinsiancin K (11) in CD<sub>3</sub>OD

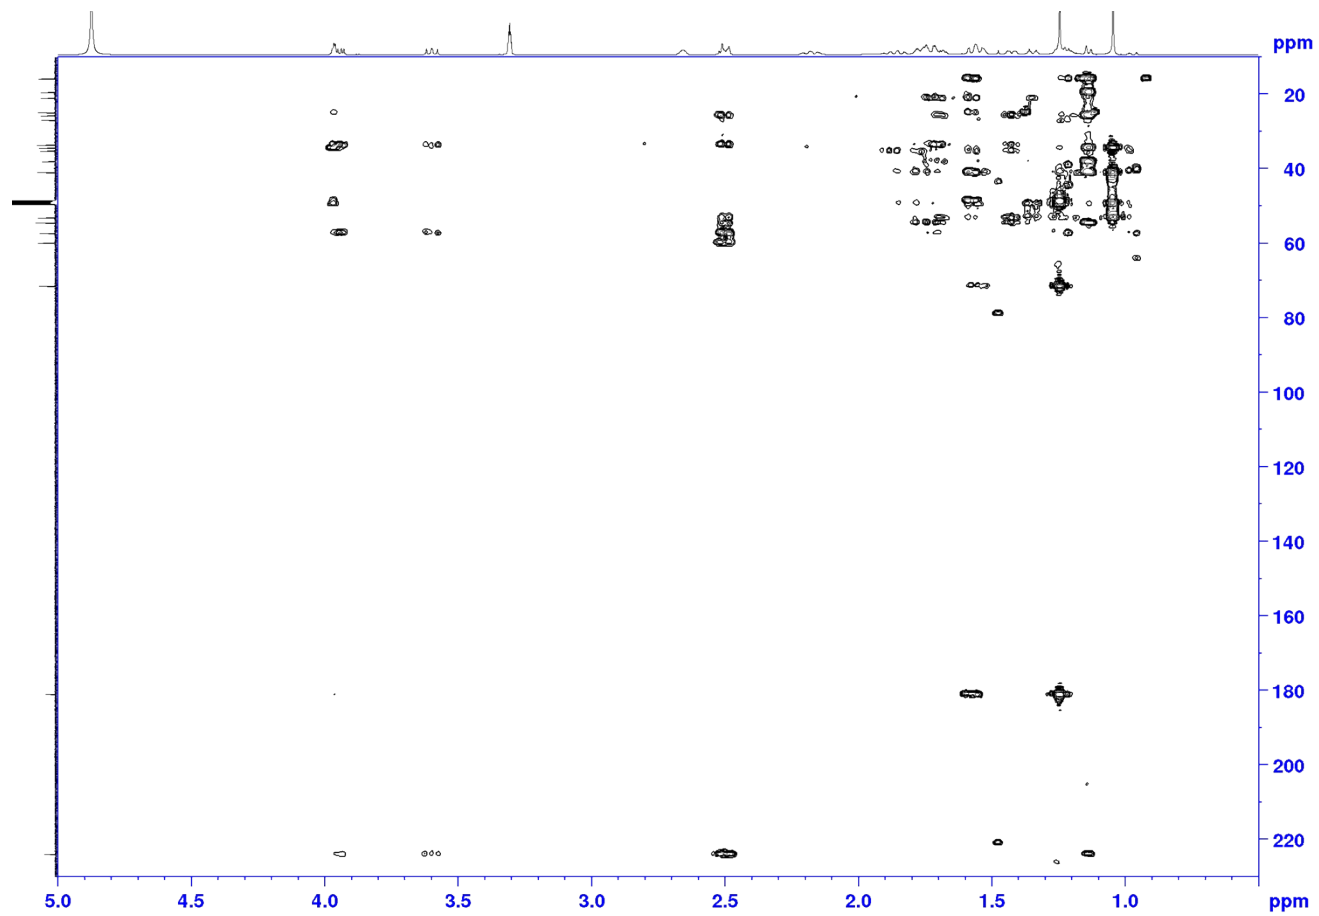

Figure S127. HMBC spectrum of Noueinsiancin K (11) in CD<sub>3</sub>OD

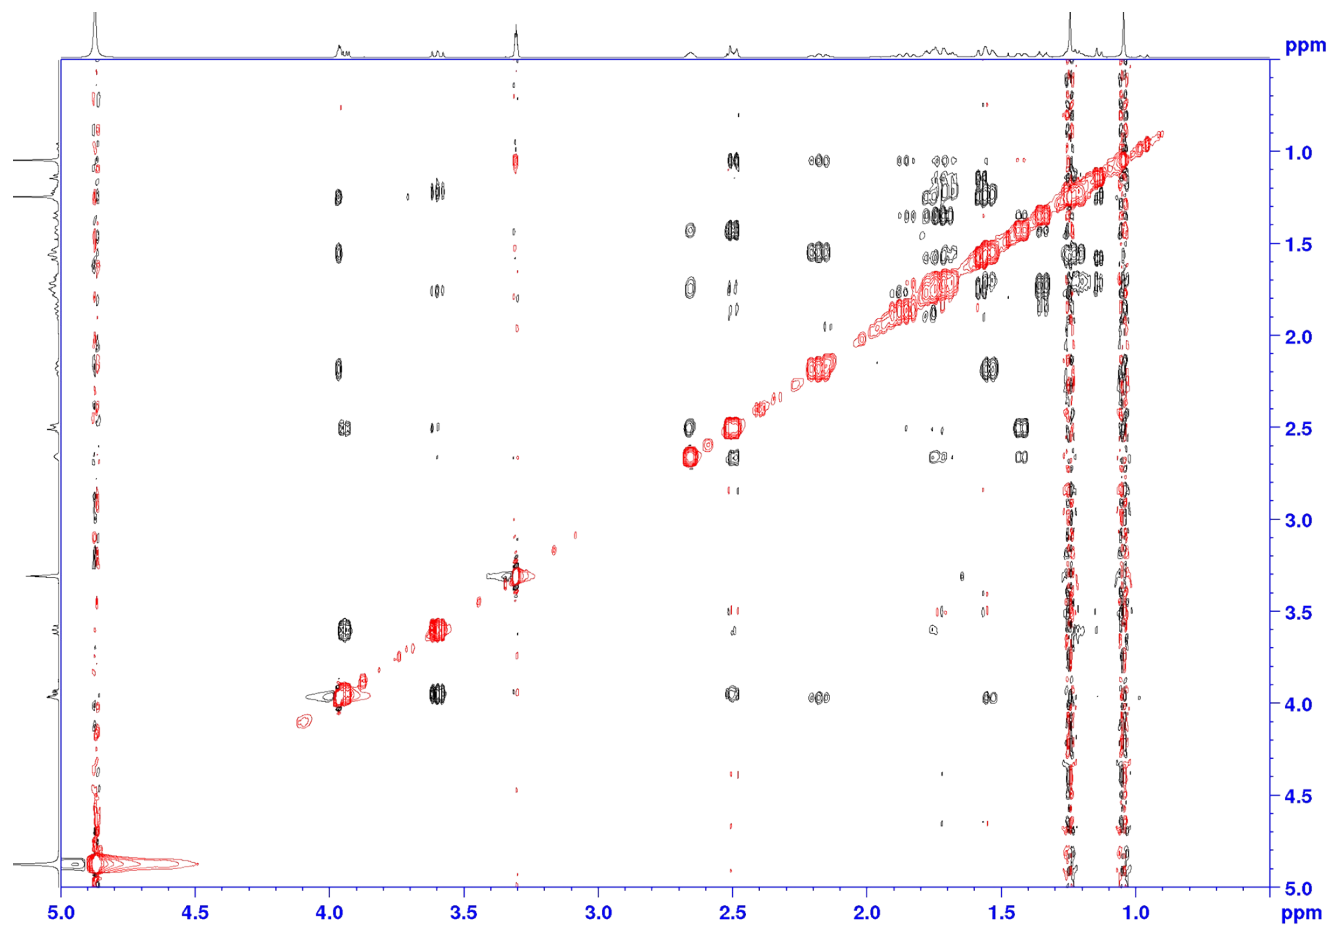

Figure S128. NOESY spectrum of Noueinsiancin K (11) in CD<sub>3</sub>OH
